1 Analysis of *Epichloë festucae* small secreted proteins in the  
2 interaction with *Lolium perenne*

3

4 **Berit Hassing<sup>1,2</sup>, David Winter<sup>1,2</sup>, Yvonne Becker<sup>3</sup>, Carl H. Mesarich<sup>1,4</sup>,**  
5 **Carla J. Eaton<sup>1,2</sup>, Barry Scott<sup>1,2</sup>**

6

7 <sup>1</sup>Institute of Fundamental Sciences, Massey University, Palmerston North, New  
8 Zealand

9 <sup>2</sup>Bio-Protection Research Centre, New Zealand

10 <sup>3</sup> Institute for Epidemiology and Pathogen Diagnostics, Julius Kühn-Institute, Federal  
11 Research Centre for Cultivated Plants, Braunschweig, Germany

12 <sup>4</sup>School of Agriculture and Environment, Massey University, Palmerston North, New  
13 Zealand

14

15 \* Corresponding author

16 E-mail: [d.b.scott@massey.ac.nz](mailto:d.b.scott@massey.ac.nz) (BS)

17

## 18 Abstract

19 *Epichloë festucae* is an endophyte of the agriculturally important perennial  
20 ryegrass. This species systemically colonises the aerial tissues of this host  
21 where its growth is tightly regulated thereby maintaining a mutualistic symbiotic  
22 interaction. Recent studies have suggested that small secreted proteins,  
23 termed effectors, play a vital role in the suppression of host defence responses.  
24 To date only a few effectors with important roles in mutualistic interactions have  
25 been described. Here we make use of the fully assembled *E. festucae* genome  
26 and EffectorP to generate a suite of 141 effector candidates. These were  
27 analysed with respect to their genome location and expression profiles *in planta*  
28 and in several symbiosis-defective mutants. We found an association between  
29 effector candidates and a class of transposable elements known as MITEs, but  
30 no correlation with other dynamic features of the *E. festucae* genome, such as  
31 transposable element-rich regions. Three effector candidates and a small GPI-  
32 anchored protein were chosen for functional analysis based on their high  
33 expression *in planta* compared to in culture and their differential regulation in  
34 symbiosis defective *E. festucae* mutants. All three candidate effector proteins  
35 were shown to possess a functional signal peptide and two could be detected  
36 in the extracellular medium by western blotting. Localization of the effector  
37 candidates *in planta* suggests that they are not translocated into the plant cell,  
38 but rather, are localized in the apoplastic space or are attached to the cell wall.  
39 Deletion and overexpression of the effector candidates, as well as the putative  
40 GPI-anchored protein, did not affect the plant growth phenotype or restrict  
41 growth of *E. festucae* mutants *in planta*. These results indicate that these

42 proteins are either not required for the interaction at the observed life stages or  
43 that there is redundancy between effectors expressed by *E. festucae*.

44

## 45 **Introduction**

46 Plant-pathogenic fungi deploy a number of virulence factors, termed effector  
47 proteins, to promote colonization of their hosts. These effector proteins, which  
48 can be targeted to the host apoplast (extracellular effectors) or to various  
49 compartments of the plant cell (intracellular effectors), typically promote  
50 colonization by altering host physiology or by modulating host immune  
51 responses [1]. Well-characterized examples of extracellular fungal effector  
52 proteins include Avr2, Avr4 and Ecp6 from the tomato leaf mould pathogen  
53 *Cladosporium fulvum* [2-4], as well as Pit2 and Rsp3 from the corn smut  
54 pathogen *Ustilago maydis* [5, 6]. More specifically, Avr4 binds to chitin  
55 molecules present in the cell wall of invading hyphae to prevent hydrolysis by  
56 host chitinases [2, 7], while Ecp6 sequesters chitin oligosaccharides released  
57 from the cell wall of invading hyphae to prevent detection by host chitin immune  
58 receptors [4, 8]. Rsp3 binds to the cell wall of invading hyphae to protect them  
59 against two antimicrobial mannose-binding host proteins [6], while both Pit2  
60 and Avr2 inhibit host cysteine proteases to prevent degradation of fungal  
61 proteins [3, 9-11]. A well-characterized example of an intracellular fungal  
62 effector protein is Cmu1 from *U. maydis*, which functions as a chorismate  
63 mutase to redirect the metabolism of chorismate away from the production of  
64 the defense signaling hormone salicylic acid [12].

65           Like plant-pathogenic fungi, plant-beneficial fungi must also deploy  
66 effector proteins to promote host colonization [13, 14]. However, to date only a  
67 small number of effectors from this group of fungi have been identified and  
68 functionally characterized. Furthermore, of those that have been functionally  
69 characterized all are from mycorrhizal fungi. One such example is MiSSP7 from  
70 *Laccaria bicolor*, an ectomycorrhizal fungus of poplar roots. In plants (including  
71 poplar), JAZ proteins repress the expression of jasmonic acid (JA)-related  
72 defense genes, with the degradation of these proteins leading to the activation  
73 of JA-related defense genes [15]. During infection of poplar, MiSSP7 is  
74 transported into the plant nucleus where it interacts with and stabilizes the JAZ  
75 protein PtJAZ6 to prevent its degradation, and thus prevent the expression of  
76 JA defence-related genes [16, 17]. A second example is SP7, which is  
77 produced by the arbuscular mycorrhizal fungus, *Glomus intraradices*. SP7,  
78 which like PtJAZ6 is also transported into the plant nucleus, influences defense  
79 gene signaling by interacting with the pathogenicity-related transcription factor  
80 ERF12 [18]. A third example is Fgb1 has been characterized from the  
81 endophytic root-colonizing fungus, *Piriformospora indica*. Fgb1 is a  $\beta$ -glucan-  
82 binding lectin that modulates the fungal cell composition and prevents  $\beta$ -glucan-  
83 triggered immunity in plants, presumably through a similar mechanism to that  
84 shown for as Ecp6 and other LysM domain-containing effectors from plant-  
85 pathogenic fungi [19].

86           There is little amino acid sequence conservation between effector  
87 proteins of plant-associated fungi, and most lack obvious functional domains.  
88 Together, these features render their identification and functional  
89 characterization difficult. Some features, however, are common to many

90 effector proteins. For example, most have an amino (N)-terminal signal peptide  
91 for secretion, are small (<300 amino acid residues in length) and rich in an even  
92 number of cysteines, and are highly expressed during host colonization [1, 20].  
93 Furthermore, many of these effector proteins are encoded by genes located in  
94 dynamic regions of the fungal genome (e.g. those regions rich in transposable  
95 elements; TEs), where increased mutation rates can result in the increased  
96 diversification of effector genes; a beneficial trait in the ‘arms race’ with the host  
97 [1, 21, 22]. One group of TEs are miniature inverted-repeat transposable  
98 elements (MITES)[23], which are small non-autonomous DNA transposable  
99 elements that have been proposed to have a role in regulating the expression  
100 of plant induced genes in phytopathogenic and mutualistic fungi [24-27].

101 Here we present an analysis of effector candidates from *Epichloë*  
102 *festucae*, an endophytic fungus of the cool-season grass, *Lolium perenne*. The  
103 interaction between *Epichloë spp.* and cool-season grasses is of agricultural  
104 importance due to the array of secondary metabolites produced by the  
105 endophyte that protect the host from various biotic stresses, such as insect and  
106 mammalian herbivory [28]. Unlike mycorrhizal fungi, which only infect the roots  
107 of their host plants, *E. festucae* and other *Epichloe spp.* exclusively colonize  
108 plant aerial tissues and are only found in association with their host. These  
109 endophytes can be vertically transmitted through host seeds [29, 30] or  
110 horizontally transmitted by ascospore transfer. The latter occurs following  
111 sexual development on host inflorescences, and results in the formation  
112 stromata that prevent the maturation of these inflorescences to cause ‘choke’  
113 disease [31, 32]. While some *Epichloë spp.* have a high degree of host  
114 specificity, others, such as *E. typhina*, can infect a variety of grass species [33].

115 Within the host tissue, the fungal growth is highly restricted and confined to the  
116 intercellular spaces. Deletion of key signaling genes results in the loss of this  
117 restricted growth and, in doing so, the ‘breakdown’ of the symbiosis [34-40].  
118 Here, we make use of the fully assembled *E. festucae* genome [26] and  
119 EffectorP [41] to identify a suite of candidate effectors in this mutualistic  
120 endophyte, and analyse their genomic location to identify potential patterns of  
121 distribution. In addition, we use multiple transcriptome datasets to generate an  
122 expression profile for these candidate effectors, with the aim of identifying  
123 effectors with a potential role in the *E. festucae*-*L. perenne* interaction. Based  
124 on these analyses, three candidate effectors were selected for functional  
125 characterization. As GPI-anchored proteins play an important role in plant-  
126 fungus interactions [42, 43] we also selected a GPI anchored protein with a  
127 similar expression file to the abovementioned candidate effectors for functional  
128 characterization.

## 129 **Materials and Methods**

### 130 **Bioinformatics**

131 A detailed record of the bioinformatic and statistical analyses performed in this  
132 study is provided in S1 File. Here we briefly describe each step of these  
133 analyses.

#### 134 *Classification of proteins and amino acid composition*

135 The program SignalP v4.1 [44] was used to identify those *E. festucae* proteins  
136 of  $\leq 200$  amino acid residues in length that contain an N-terminal secretion  
137 signal, while EffectorP v 1.0 [41] was used to predict which of these proteins is

138 an effector. The latter uses a machine learning approach based on sequence  
139 properties common to known effectors. Taking these results together, each  
140 protein was then classified into one of three non-overlapping classes: (i)  
141 candidate effectors (proteins with  $\leq 200$  amino acid residues, a signal peptide  
142 and an EffectorP probability of  $>0.5$ ), (ii) secreted proteins (proteins with a  
143 signal peptide that do not meet the other abovementioned criteria for effectors),  
144 and (iii) non-secreted proteins (all other proteins). The hypothesis that secreted  
145 proteins are more cysteine-rich than average was tested using a logistic  
146 regression. Specifically, a model with the proportion of cysteine residues as the  
147 response variable and membership of the three protein-classes described  
148 above as a predictor was fitted using R 3.0.1 [45].

#### 149 **Genomic landscape of candidate effectors**

150 Bedtools v 2.26.0 [46] and the recently published *E. festucae* F11 genome [26],  
151 were used to calculate the distance between each protein-coding gene and its  
152 nearest AT-rich isochore, miniature inverted TE (MITE) and telomere. Logistic  
153 regression was used to test whether secreted proteins and candidate effectors  
154 are more likely to appear near to a MITE (within 2 kb), an AT-rich isochore  
155 (within 5 kb) or a sub-telomeric region (within 50 kb) than other proteins. A  
156 Monte Carlo approach was used to test whether genes encoding candidate  
157 effectors fall into clusters within the F11 genome. Specifically, Bedtools was  
158 used to calculate the minimum distance between each effector-encoding gene  
159 and another gene of the same type (i.e. the minimum distance to another  
160 candidate effector gene). The mean distance between candidate effector genes  
161 was compared to a null distribution of this statistic. We simulated this null

162 distribution by calculating the same statistic for 1000 random gene-sets, each  
163 the same size as the set of candidate effectors.

## 164 **Gene expression analyses**

165 The hypothesis that genes encoding candidate effectors are differentially  
166 expressed *in planta* compared to axenic culture was tested by logistic  
167 regression, using previously published RNAseq data as input [36, 47]. A model  
168 in which the probability that genes demonstrate significant (corrected p-value <  
169 0.01) and substantial (> 2 log<sub>2</sub> fold) differences in expression between culture  
170 and *planta* conditions compared between candidate effectors, secreted  
171 proteins and all other proteins was fitted using R. Similarly, the hypothesis that  
172 repression of candidate effector genes is disrupted in  $\Delta hepA$ , a mutant of the  
173 heterochromatin protein 1 (HP1) gene [48, 49], was tested using logistic  
174 regression. Finally, the *in planta* expression of candidate effector genes was  
175 compared across four separate symbiosis-deficient mutants, including  $\Delta noxA$ ,  
176  $\Delta proA$  and  $\Delta sakA$  [36, 47] and  $\Delta hepA$  (Chujo & Scott, personal communication.  
177 The  $\Delta hepA$  transcriptome data used here is available from the Sequence Read  
178 Archive (SRA) under Bioproject PRJNA447872. A list of the individual  
179 biosample numbers is provided in S1 Table.

180

## 181 **Strains and growth conditions**

182 *Escherichia coli* strains were grown overnight in Lysogeny Broth (LB) or on LB  
183 agar supplemented with 100 µg/ml ampicillin or 50 µg/ml kanamycin at 37°C,  
184 as described by [50]. *Agrobacterium tumefaciens* strains were grown for one  
185 day in LB broth or for two days on LB agar supplemented with 50 µg/ml



186 kanamycin at 30°C, as previously described [51]. *Saccharomyces cerevisiae*  
187 strains were grown at 30°C on YPDA (2% peptone, 1% yeast extract 0.01%  
188 adenine hemisulfate, 2% glucose, 2% agar; adjusted to pH 5.7). For *S.*  
189 *cerevisiae* complementation assays cells were plated on CMD tryptophan  
190 dropout medium (0.67% yeast nitrogen base, 0.064% W/L dropout supplement,  
191 0.00033% leucine, 2% sucrose, 0.1% glucose, 2% agar, pH 5.7). To test for  
192 secretion of the SUC2 secretion signal fusion protein, fresh colonies of *S.*  
193 *cerevisiae* were streaked on CMDRAA medium (0.67% yeast nitrogen base,  
194 0.064% W/L dropout mixture, 0.00033% leucine, 0.00033% tryptophan, 2%  
195 raffinose, 2 µg/ml antimycin A, 2% agar, pH 5.8) and compared with growth on  
196 YPDA control plates [52, 53]. *E. festucae* strains were grown on 2.4% Potato-  
197 Dextrose Agar (PDA) supplemented with 150 µg/ml hygromycin B or 250 µg/ml  
198 geneticin or in 2.4% Potato-Dextrose Broth (PDB) for up to seven days [54, 55].  
199 For microscopy analyses, strains were grown on 3% water agar overlaid with  
200 1.5% water agar [40]. All strains used in this study can be found in S2 Table.

201

## 202 **Plant growth and endophyte inoculation**

203 *E. festucae* strains were inoculated into endophyte-free seedlings of perennial  
204 ryegrass (*L. perenne* cv Samson) using the method previously described [56].  
205 Inoculated plants were grown in root trainers at 22°C in a controlled growth  
206 room with a photoperiod of 16 h light (approximately 100 µE/m<sup>2</sup>/s) and 8 h dark.  
207 *N. benthamiana* and *N. tabacum* were grown at approx. 28°C in a controlled  
208 growth room with a photoperiod of 16 h light (approximately 100 µE/m<sup>2</sup>/s) and  
209 8 h dark for 6–7 weeks. For agroinfiltration experiments (see below), plants  
210 were transferred to a greenhouse and grown at 25°C with natural lighting.

211

## 212 **DNA isolation, PCR and sequencing**

213 High quality genomic DNA was extracted from freeze-dried mycelium of  
214 *E. festucae* as previously described [57]. Plasmid DNA was extracted from *E.*  
215 *coli* using the High Pure plasmid isolation kit (Roche). DNA resolved by agarose  
216 gel electrophoresis was purified using the Wizard SV Gel and PCR Clean-Up  
217 System (Promega) or the Zymoclean Gel DNA Recovery kit (Zymo Research).  
218 PCR amplification of short DNA products was conducted with the OneTaq®  
219 (NEB) polymerase according to the manufacturer's instructions. Each reaction  
220 was set up as follows: 1× Standard OneTaq Reaction Buffer, 200 μM dNTPs,  
221 0.2 μM for each forward and reverse primer, 0.025 units/μl OneTaq Polymerase  
222 and 20-300 ng of template DNA. If crude DNA was used as a template, 3%  
223 DMSO was added. PCRs were performed with the following Thermocycler  
224 (Eppendorf) settings: 1 min at 94°C for initial denaturation, then 30-35 cycles of  
225 30 s at 94°C (denaturation), 30 s at 45-65°C (annealing), 1 min/kb at 68°C  
226 (extension) followed by 3-5 min at 68°C (final extension). Amplification of DNA  
227 fragments for Gibson Assembly [58] was performed with Phusion High Fidelity  
228 polymerase (ThermoFisher Scientific). Each reaction was set up as follows: 1×  
229 Phusion HF buffer, 200 μM dNTPs, 0.5 μM of each forward and reverse primer,  
230 0.02 U/μl Phusion polymerase and 20-300 ng of template DNA. PCRs were  
231 performed with the following Thermocycler settings: 1 min at 98°C for initial  
232 denaturation, then 30-35 cycles of 30 s at 98°C (denaturation), 30 s at 59-68°C  
233 (annealing), 30 s/kb at 72°C (extension), followed by 3-5 min at 72°C (final  
234 extension). Where long primers (>30 bp) were used, a 2-step PCR was

235 performed with the same reaction set up, but with different cycler settings: 1  
236 min at 98°C for initial denaturation, then 5 cycles of 30 s at 98°C (denaturation),  
237 30 s at 55°C (annealing), 30 s/kb at 72°C (extension), followed by 25 cycles of  
238 30 s at 98°C (denaturing) and 30 s/kb at 72°C (extension). Subsequently the  
239 reaction was incubated for 3-5 min at 72°C (final extension). PCR products  
240 were purified using the Wizard SV Gel and PCR Clean-Up System (Promega).  
241 Primers were sourced from Integrated DNA Technologies. Primer sequences  
242 can be found in the Supplemental Table S2. Sequencing reactions were  
243 performed using the Big-Dye™ Terminator Version 3.1 Ready Reaction Cycle  
244 Sequencing Kit (Applied BioSystems, Carlsbad, California, USA), and  
245 separated using an ABI3730 genetic analyser (Applied Bio Systems).  
246 Sequence data was assembled and analysed using MacVector sequence  
247 assembly software,  
248 v14.5.2.

## 249 **Preparation of constructs**

250 The *gpiB* replacement construct, pBH1, was prepared as follows. Firstly, the  
251 1,639 bp 5' and 1,389 bp 3' flanks of *gpiB* were amplified from wild type (WT)  
252 *E. festucae* strain FI1 genomic DNA by PCR using BH1/BH2 and BH3/BH4  
253 primer pairs, respectively. The 1,394 bp hygromycin resistance cassette  
254 (*P<sub>trpC</sub>-hph*) sequence was then amplified from pSF15.15 DNA using the  
255 hph\_F/hph\_R primer pair. The 5,483 bp backbone vector, pRS426, was  
256 amplified by PCR using the pRS426\_F/pRS246\_R primer pair. All PCRs were  
257 performed with Phusion High-Fidelity DNA polymerase (NEB). The fragments  
258 were then assembled via Gibson Assembly [58] and the correct assembly was

259 verified using a diagnostic restriction enzyme digest and sequencing. The  
260 replacement constructs for *sspM* (pBH2), *sspN* (pBH3) and *sspO* (pBH4) were  
261 generated in the same way. The 1,377 bp 5' and 1,333 bp 3' flanks of *sspM*  
262 were amplified with the BH11/BH12 and BH9/BH10 primer pairs, respectively;  
263 the 1,431 bp 5' and 1,433 bp 3' flanks of *sspN* were amplified with the  
264 BH15/BH16 and BH13/BH14 primer pairs, respectively; and the 1,443 bp 5' and  
265 1,318 bp 3' flanks of *sspO* were amplified with the BH5/BH6 and BH7/BH8  
266 primer pairs, respectively.

267         The *S. cerevisiae* complementation vector pSUC2T7M13ORI [52] was  
268 fully sequenced using primers BH25 to BH42 and BH61 to BH63. The  
269 nucleotide sequences encoding the secretion signals from SspN (54 bp), SspO  
270 (54 bp), SspM (54 bp) and GpiB (57 bp) were then amplified from *E. festucae*  
271 strain FI1 genomic DNA with the BH21/BH22, BH70/BH71, BH68/BH69 and  
272 BH64/BH65 primer pairs, respectively, using OneTaq polymerase. In doing so,  
273 these primers added a 5' *EcoRI* and 3' *XhoI* restriction site to each amplified  
274 sequence. Due to difficulties in working with small fragments different cloning  
275 strategies were effective for the different fragments. The *sspN* fragment was  
276 cloned into the TOPO-TA vector according to the manufacturer's instructions.  
277 Following this cloning step, pSUC2TM13ORI and the TOPO-TA vector  
278 containing the *sspN* secretion signal-encoding nucleotide sequence were  
279 digested with *EcoRI* and *XhoI* restriction enzymes and purified. The  
280 pSUC2TM13ORI vector backbone and secretion signal-encoding nucleotide  
281 sequence were then ligated using T4 ligase to generate pBH7. The *gpiB*, *sspM*  
282 and *sspO* secretion signal-encoding nucleotide sequences were directly  
283 digested with *EcoRI* and *XhoI* and purified, omitting the sub-cloning step into

284 the TOPO-TA vector. Subsequently the nucleotide sequences were then  
285 directly ligated into *EcoRI* and *XhoI* digested pSUCTM13ORI generating pBH5  
286 (*gpiB*), pBH11 (*sspM*) and pBH9 (*sspO*) respectively.

287 The four overexpression constructs were generated by Gibson  
288 Assembly [58] of two fragments, respectively. The 2,844 bp backbone  
289 fragment, containing a hygromycin resistance cassette, was amplified from  
290 pBH12 with the primer pair BH75/76. The nucleotide fragments encoding *gpiB*,  
291 *sspM*, *sspN* or *sspO* downstream of the *Ptef* promoter as well as an ampicillin  
292 resistance gene (*bla*) and an *oriT* were amplified from pBH14, pBH18, pBH21  
293 or pBH24 respectively. For amplification, the primer pairs BH72/BH120 (3,476  
294 bp), BH72/BH121 (3,725 bp), BH72/122 (3,525 bp) or BH72/BH123 (3,493 bp)  
295 were used, respectively. Assembly of the respective fragments generated the  
296 plasmids pBH29 (*gpiB*), pBH30 (*sspM*), pBH31 (*sspN*) and pBH32 (*sspO*).

297 Constructs encoding the genes of interest, C-terminally fused to an  
298 8xHis tag, were generated via Gibson Assembly [58]. Again, each plasmid was  
299 assembled from two fragments. The 2,488 bp backbone was amplified from  
300 pBH30 using the BH176/BH75 primer pair. The forward primer, BH176, was  
301 designed in a way that it added the 8xHis tag followed by a stop codon to the  
302 fragment. The *sspM*-, *sspN*- and *sspO*- encoding fragments were amplified  
303 from pBH30, pBH31 and pBH32 with the primer pairs BH72/BH177 (3,728 bp),  
304 BH72/BH178 (3,528 bp) and BH72/179 (3,496 bp) respectively. The reverse  
305 primers BH177/BH178/BH179 were designed in such a way that the stop codon  
306 was removed and an overhang to the 8xHis tag was generated. The *gpiB*-  
307 containing fragment was generated based on a previously generated construct,  
308 pBH34. To prevent the loss of the 8xHis tag due to the addition of the GPI

309 anchor at the omega site [59], the 8xHis tag was added 30 bp upstream of the  
310 omega site. To this end, the vector was assembled in two pieces amplified from  
311 pBH34: the 2,823 bp fragment amplified by PCR with BH181/BH75 primer pair  
312 containing the C-terminus of *gpiB* as well as the hygromycin resistance  
313 cassette, and the 3,377 bp fragment amplified by PCR with the BH72/BH180  
314 primer pair encoding an ampicillin resistance gene, an OriT and the *gpiB* N-  
315 terminus. The primers BH180 and BH181 generated the 8xHis tag and thereby  
316 overhangs with each other. This generated the plasmids pBH56 (*gpiB*), pBH57  
317 (*sspM*), pBH58 (*sspN*) and pBH59 (*sspO*).

318 For the localization constructs, the plasmid pBV579 (PN4241) encoding  
319 mCherry fused to a T-virus nuclear localization signal, was used [60]. The  
320 constructs were generated via Gibson Assembly [58] from three different  
321 fragments, generating C-terminal translational fusions between the *ssp* of  
322 interest and mCherry-NLS separated by a (GGGS)<sub>2</sub> linker to facilitate  
323 independent folding of the protein of interest and mCherry. All constructs  
324 incorporated the native *ssp* promoter. The 5,060 bp backbone of the vector was  
325 amplified by PCR from pBH12 with the BH76/BH78 primer pair. The 834 bp  
326 mCherry-NLS fragment was amplified by PCR from pBV579 with the  
327 BH79/BH80 primer pair, where the primer BH79 added the linker. The *sspM*,  
328 *sspN* and *sspO* and the corresponding promoter encoding fragments were  
329 amplified by PCR from WT genomic DNA using the primer pairs BH88/BH86  
330 (827 bp), BH91/BH89 (977 bp) and BH93/BH94 (798 bp) respectively.  
331 Assembly of the fragments generated the plasmids pBH19, pBH22 and pBH25.  
332 All plasmids can be found in S2 Table and all primers in S3 Table.

## 333 **Transformation of organisms**

334 Chemically competent *E. coli* DH5 $\alpha$  were transformed by heat-shock for 1 min  
335 at 42°C, followed by a 2 min incubation step on ice. Cells were allowed to  
336 recover for 1 h at 37°C in SOC medium and subsequently plated on LB agar  
337 containing ampicillin or kanamycin. *S. cerevisiae* YTK12 cells were made  
338 competent using the lithium acetate method [61], transformed by heat-shock  
339 for 30 min at 40°C [62] and plated on defined CMD tryptophan dropout medium  
340 (see above). *A. tumefaciens* GV3101 [63] cells were made competent and  
341 transformed by electroporation (25 mF, 2.5 kV, 200  $\Omega$ ) [64]. Cells were allowed  
342 to recover in SOC medium and then plated on LB agar containing kanamycin.  
343 *E. festucae* FI1 protoplasts were generated as previously described [65].  
344 Protoplasts were transformed with up to 5  $\mu$ g of the construct using the method  
345 previously described [66]. Protoplasts were allowed to regenerate overnight on  
346 regeneration agar (RG) and overlaid with RG agar containing either hygromycin  
347 B or geneticin the next day.

348

## 349 **Protein extraction, protein purification and western** 350 **blotting**

351 For protein extraction, *E. festucae* strains were grown for at least 3 days in  
352 liquid PD at 22°C. Cultures were filtered through a nappy liner, washed, and  
353 snap frozen in liquid nitrogen and ground to a fine powder. Depending on the  
354 amount of mycelium, 400–800  $\mu$ l of lysis buffer (50 mM NaH<sub>2</sub>PO<sub>4</sub>, 300 mM  
355 NaCl, 10 mM imidazole, 0.1% (v/v) IGEPAL CA360, 0.2 mM PMSF, 10  $\mu$ l/ml  
356 protease inhibitory cocktail (Sigma Aldrich), 5 mM  $\beta$ -mercaptoethanol) was



357 added and samples were vortexed for 10 min. Subsequently, samples were  
358 centrifuged at 14,000 g for 15 min at 4°C and the supernatant was stored at -  
359 20°C. The growth medium of each strain (50–80 ml) was collected and filtered  
360 through a 0.45 µm filter. Samples were concentrated to approx. 2 ml with  
361 Vivaspin 20 MWCO 30,000 spin columns (GE Healthcare Life Sciences)  
362 according to the manufacturer's instructions and washed twice with 10 ml lysis  
363 buffer. Samples were stored at -20°C.

364 The protein purification was performed with Ni-NTA spin columns  
365 (Qiagen) according to the manufacturer's instructions with the exception of the  
366 elution buffer (50 mM NaH<sub>2</sub>PO<sub>4</sub>, 300 mM NaCl, 10–500 mM imidazole, 0.1%  
367 (v/v) IGEPAL CA360), 0.2 mM PMSF, 10 µl/ml protease inhibitory cocktail  
368 (Sigma Aldrich)). Samples were loaded onto 15% (w/v) SDS polyacrylamide  
369 gels, electrophoresed at 100 V for 1.5 h then electrophoretically transferred at  
370 30 V for 1 h to PMSF membranes (Roche). The primary antibody, rabbit α-His  
371 (Abcam, ab9108), was used in a 1:2,000 dilution and the secondary goat α-  
372 rabbit-HRP (Abcam, ab6721) in a 1:10,000 dilution. Detection was performed  
373 with the Amersham ECL western blotting detection reagent (GE Healthcare Life  
374 Sciences).

375 For the verification of Ssp and GpiB production in *N. benthamiana*, total  
376 protein was extracted from the infiltrated area. First the tissue was snap frozen,  
377 then ground to a fine powder in liquid nitrogen and subsequently resuspended  
378 in an equal volume of GTEN buffer (10% glycerol, 100 mM Tris pH 7.5, 1 mM  
379 EDTA, 150 mM NaCl, 10 mM DTT, 0.2% IGEPAL CA360, 10 µl/ml protease  
380 inhibitory cocktail (Sigma Aldrich), 1% PVP). Afterwards, samples were  
381 centrifuged at 14,000 rpm for 15 min at 4°C and the supernatant was stored at



382 -20°C. Samples were loaded onto a 15% SDS polyacrylamide gel and  
383 transferred onto PMSF membranes (Roche) as described above. The primary  
384 antibody, a mouse  $\alpha$ -FLAG antibody (Sigma, F6165), was used in a 1:2,000  
385 dilution followed by the secondary goat  $\alpha$ -mouse-HRP (Santa Cruz  
386 Biotechnology, Dallas, TX, USA) antibody in a 1:1,000 dilution.  
387

### 388 **RNA extraction and qPCR**

389 For the determination of the gene copy number, high quality gDNA was  
390 extracted as described above and qPCR was performed with SYBR Green  
391 (Invitrogen) on a LightCycler 480 System (Roche) as per the manufacturer's  
392 instructions. Each sample was analysed with two technical replicates. The  
393 single copy genes *hepA* (EfM3.043690) and *pacC* (EfM3.009480) were used  
394 as reference genes and the copy number was calculated relative to WT as  
395 described previously [67].

396 For the determination of relative expression levels, RNA was extracted  
397 from freeze-dried mycelium using TRIzol reagent (Invitrogen). Subsequently,  
398 cDNA synthesis was performed with the QuantiTect Reverse Transcriptase kit  
399 (Quiagen). The qRT-PCR was performed as described above. Each sample  
400 was analysed with two technical replicates. The genes coding for translation  
401 elongation factor 2 (EF-2, EfM3.021210) and 40S ribosomal protein S22 (S22,  
402 EfM3.016650) were chosen as reference genes as previously described [68].  
403 The expression level was calculated relative to WT as described previously  
404 [67]. All primers used for qPCR and qRT-PCR can be found in the S3 Table.  
405

## 406 **Analysis of transmission of *E. festucae* mutants into *L.*** 407 ***perenne* seeds**

408 Twenty endophyte free seedlings of *L. perenne* cv. Samson were inoculated  
409 with three independent deletion strains of *gpiB* (T111, T133, T148), *sspM* (T52,  
410 T99, T163), *sspN* (T10, T30, T52) and *sspO* (T78, T195, T210) [56, 69]. Twenty  
411 seeds were inoculated with PD agar as mock control. Plants were grown in root  
412 trainers in the greenhouse for 7 weeks at 20°C with a photoperiod of 16 h of  
413 light and tested for presence of the endophyte by immunoblotting [70]. Five  
414 immunoblot positive plants of each strain were transferred to new pots 10  
415 weeks post-infection and grown in the greenhouse for additional two weeks.  
416 For vernalisation, plants were transferred to a growth cabinet and cultivated for  
417 7 weeks at 6°C with a short-day photoperiod of 8 h light and 16 h dark. Starting  
418 from four weeks until ten weeks after vernalisation, plants produced  
419 inflorescences. Ovaries were collected, stored in 95% EtOH and stained [69]  
420 when pollen was visible and ovaries mature. Stained ovaries were stored in  
421 70% glycerol until microscopic observation. Seeds were collected, dried and  
422 stored in the fridge until further use. For microscopy and immunoblotting of  
423 seeds, the seeds were surface sterilised [56, 69], germinated on wet filter paper  
424 overnight and cross sections used for immunoblotting.

425

## 426 **Microscopy**

427 For microscopy of *E. festucae* culture growth, a small piece of a fresh colony  
428 was inoculated on the edge of a glass slide covered with a thin layer of 1.5%  
429 H<sub>2</sub>O agar placed on an agar plate with 3% H<sub>2</sub>O agar. Strains were incubated

430 for 6 days before examination with an Olympus IX71 inverted fluorescence  
431 microscope using the filter sets for DIC and CFW/DAPI. For staining of the cell  
432 wall, a drop of a 3 mg/ml of Calcoflour White was added to the sample just  
433 before microscopy.

434 For the examination of growth and morphology of hyphae *in planta*,  
435 pseudostem tissue was stained with aniline blue diammonium salt (Sigma) and  
436 Wheat Germ Agglutinin conjugated to AlexaFluor®488 (WGA-AF488,  
437 Molecular Probes/Invitrogen). First, infected tissue was incubated in 100%  
438 EtOH overnight at 4°C followed by an incubation in 10% KOH overnight at 4°C.  
439 Samples were washed at least 3 times with PBS (pH 7.4) before incubation in  
440 the staining solution (0.02% aniline blue, 10 ng/ml WGA-AF488, 0.02%  
441 Tween®-20 (Invitrogen) in PBS (pH 7.4)) for 10 min. Samples were vacuum-  
442 infiltrated with the staining solution for 30 min and then stored at 4°C until  
443 analysis. Examination of these samples was performed with a Leica SP5  
444 DM6000B confocal microscope (488 nm argon and 561 nm DPSS laser, 40×  
445 oil immersion objective, NA= 1.3) (Leica Microsystems). For TEM pseudostem  
446 samples were fixed with 3% glutaraldehyde and 2% formaldehyde in 0.1 M  
447 phosphate buffer, pH 7.2 for 1 h, as described previously [71]. The fixed  
448 samples were examined with a Philips CM10 TEM and the images were  
449 acquired using a SIS Morada digital camera. Sections of the resin-embedded  
450 samples were also stained with 0.05% toluidine blue in phosphate buffer and  
451 heat-fixed at approx. 100°C for 10 s. These samples were examined with a  
452 Zeiss Axiophot Microscope with Differential Interference Contrast (DIC) Optics  
453 and Colour CCD camera.

454 For the *in planta* localization of the Ssp-mCherry-NLS fusion proteins, un-fixed  
455 pseudostem samples were examined with a Leica SP5 DM6000B confocal  
456 microscope (488 nm argon and 561 nm DPSS laser, 40× oil immersion  
457 objective, NA= 1.3).

## 458 **Preparation of binary vectors, agroinfiltration and** 459 **suppression assay**

460 All binary backbone vectors for transformation into *Agrobacterium* are listed in  
461 S2 Table. The plasmids pBH44-47 were generated via Golden Gate cloning  
462 using pICH86988 as the backbone. The nucleotide sequences of *gpiB*, *sspM*,  
463 *sspN* and *sspO* were amplified by PCR without their native secretion signal  
464 from WT *E. festucae* cDNA with primer pairs adding additional base pairs for  
465 the necessary overhang and a *BsaI* restriction site (*gpiB*: BH165/BH166, *sspM*:  
466 BH167/BH168, *sspN*: BH170/BH171, *sspO*: BH172/BH173) as described. The  
467 *N. tabacum* secretion signal PR1 $\alpha$  was obtained from pUC19B (S. Marillonet,  
468 pers.comm.). The digestion and ligation were conducted either in one step or  
469 in two separate steps. The one-step reaction was performed in a total volume  
470 of 20  $\mu$ l with 1  $\mu$ l T4 ligase (NEB) and 1  $\mu$ l BSA (NEB) and equimolar amounts  
471 of all three inserts (approx. 50 ng total). The reaction was performed in a  
472 Thermocycler (Eppendorf) with the following settings: 25 cycles of 37°C for 3 s  
473 and 16°C for 4 s, followed by 5 s inactivation at 50°C and 80°C each. For the  
474 two-step reaction, the digest was performed in a volume of 10  $\mu$ l with 1  $\mu$ l BSA  
475 (NEB) and equimolar amounts of each insert. The reaction was performed at  
476 37°C for 3 h. Subsequently the reaction was inactivated by heating to 50°C. For  
477 the ligation, the volume was topped up to 20  $\mu$ l per reaction including 1  $\mu$ l T4

478 ligase (NEB). The reaction was incubated at 16°C in a Thermocycler  
479 (Eppendorf) overnight followed by an 80°C inactivation step. A diagnostic  
480 restriction digest and DNA sequencing confirmed the sequence of all vectors.  
481 Electro-competent *A. tumefaciens* GV3101 cells were generated and  
482 transformed as described. Cells were allowed to recover in SOC medium and  
483 subsequently plated on LB agar containing kanamycin. To perform the  
484 infiltrations, fresh strains were inoculated in 3 ml LB medium with kanamycin  
485 and incubated at 30°C overnight. The next day, cultures were spun down and  
486 resuspended in 1 ml infiltration buffer (10 mM MgCl<sub>2</sub>, 10 mM MES-KOH, 100  
487 µM acetosyringone). These cultures were adjusted to an OD<sub>600</sub> of 0.4 in the  
488 necessary amount of infiltration buffer (usually 5–10 ml) and incubated at room  
489 temperature for at least 3 h before infiltration. To confirm the expression of each  
490 of the constructs, total protein was extracted from infiltrated *N. benthamiana*  
491 tissue and a western blot was performed.

492 For HR suppression assays *A. tumefaciens* strains carrying plasmids  
493 encoding the potential suppression gene pBH44 (*gpiB*), pBH45 (*sspM*), pBH46  
494 (*sspN*), pBH47 (*sspO*), pBIN-Plus-Avr3a (suppression control), pICH86966-N-  
495 3xFlag-GFP (control), pBC302-3-R3a (HR control) were infiltrated 24h before  
496 infiltration with pBC302-3-INF1 and pBIN-Plus-Avr3a (HR control).

497

## 498 **Results**

499 Candidate effectors of *E. festucae*

500 The recent availability of the complete telomere-to-telomere genome sequence  
501 of *E. festucae* strain F11, which is 35 Mb in size and encodes 8,465 predicted  
502 genes on seven chromosomes [26], provided us with the opportunity to study  
503 the organization, structure and genome context of genes encoding candidate  
504 effector proteins. First, we established which of the 8,465 predicted genes likely  
505 encode secreted proteins. For this purpose, we defined a secreted protein as  
506 any protein with a predicted amino N-terminal secretion signal, as determined  
507 using the SignalP server, that targets the protein outside of the fungal plasma  
508 membrane [44]. This definition does not exclude those proteins with a predicted  
509 transmembrane domain or GPI anchor modification site. In total, 682 genes  
510 (8.1%) were predicted to encode a secreted protein. We then analysed which  
511 of the 682 predicted secreted proteins encode candidate effectors using the  
512 EffectorP server, which predicts effectors using a machine learning approach  
513 [41]. In addition, we applied a size cutoff of  $\leq 200$  amino acids, as most fungal  
514 effectors fall within this range [72]. Out of 175 predicted secreted proteins  
515 meeting this length requirement, 141 were predicted to be candidate effectors  
516 by EffectorP. For subsequent analyses the 8,465 predicted proteins were  
517 subdivided into 'effector candidates' (n=141), 'secreted', comprising all  
518 putatively secreted proteins that are not classified as effector candidates (n=  
519 541), and 'non-secreted' made up of all putatively non-secreted proteins (n=  
520 7,783) (S4 Table).

521 To gain further insight into the possible functions of the 141 effector  
522 candidates, and to determine which of these predicted proteins have homologs  
523 across the *Sordariomycetes*, a BLASTp analysis was performed against fungal  
524 reference proteins at NCBI. Of the 141 effector candidates, 83 were found to

525 have sequence homology to proteins present in the NCBI database (E-value  
526 cut off of  $\leq 1e-10$ ), but 56 of these were to uncharacterized or hypothetical  
527 proteins. Among the 'hits' to characterized proteins were ten cell wall-  
528 associated proteins, including hydrophobins and carbohydrate-binding  
529 proteins, two toxins and other small secreted proteins (S4 Table). The majority  
530 of 'hits' were to proteins from species in the Hypocreales (21 *Claviceps spp.*,  
531 21 *Metarhizium spp.*, 14 *Pochonia spp.*, 6 *Moelleriella spp.*, 6 *Ustilaginoiea*  
532 *spp.*), with the remaining hits to proteins from other species within the  
533 Sordariomycetes. For 58 of the effector candidates, no homologs could be  
534 identified (E-value  $> 1e-10$ ), but analysis against a custom made Clavicipitaceae  
535 endophyte database ([epichloe.massey.ac.nz](http://epichloe.massey.ac.nz))[47] found potential homologs for  
536 20 of these proteins. The remaining 38 Ssps are apparently unique to *Epichloë*  
537 *spp.* (S4 Table).

538         Given many fungal effectors are cysteine-rich, a property that enables  
539 the formation of disulfide bonds and protein folding to maintain structural  
540 integrity in the protease-rich apoplast [73, 74], the frequency of cysteine  
541 residues in the effector candidates was compared with that of the secreted and  
542 non-secreted categories. As expected the candidate effectors were significantly  
543 more cysteine-rich (3.6% of residues) than either secreted (frequency= 1.7%,  
544  $P = < 1e-18$ ) or non-secreted (frequency= 1.4%,  $P < 1e-18$ ) (S1 File).

545         In smut fungi, secreted genes are predominantly arranged in clusters  
546 within the genome and are highly upregulated during tumor formation [75, 76].  
547 We therefore tested whether the genes encoding the *E. festucae* effector  
548 candidates were clustered by mapping them to each of the seven  
549 chromosomes (Fig 1A). From this low-resolution analysis, it appears that the

550 genes encoding effector candidates of *E. festucae* are evenly distributed  
551 throughout the genome. This conclusion was supported by an analysis  
552 comparing the within category gene distances, which concluded that genes  
553 encoding effector candidates are not clustered in the *E. festucae* genome (Fig  
554 1A). Of all the genes encoding candidate effectors, only eight (four gene pairs)  
555 were found within 1 kb of each other. In fact, the mean distance between  
556 candidate effector genes was not significantly different from that expected from  
557 a random subset of the 141 genes ( $P= 0.236$ ).

558 *E. festucae* is one of several filamentous fungi that has a genome  
559 comprised of distinct gene-poor AT isochores and gene-rich GC isochores [21,  
560 26]. Because the AT-rich regions are subject to an unusually high mutation rate  
561 [77-80] they are frequently referred to as 'birthplaces' for new genes such as  
562 those encoding effectors and secondary metabolites [81]. In *Leptosphaeria*  
563 *maculans* 20% of all genes in AT isochores encode small secreted proteins  
564 (SSPs, effector candidates), whereas they make up just 4.2% of all genes in  
565 GC isochores [21]. In contrast to *L. maculans*, there was no enrichment of  
566 genes encoding effectors in or near to AT isochores of the *E. festucae* genome  
567 ( $P= 0.369$ ) (Fig 1B). Similarly, there was no enrichment of genes in the secreted  
568 category in AT isochores ( $P= 0.812$ ) (Fig 1B). Indeed, of the 548 genes located  
569 in or within 1,000 bp of an AT isochore, only 1.5% and 4.7% encoded a protein  
570 from the candidate effector and secreted categories, respectively.

571 Given some fungal effector genes, such as the *AVR-Pita* gene from  
572 *Magnaporthe oryzae* [82], are found in close proximity to telomeres, we took  
573 advantage of the telomere-to-telomere *E. festucae* genome sequence to  
574 determine if genes encoding candidate effectors are located close to telomeres.



575 These regions of the genome are also subject to higher mutation rates than the  
576 remainder of the genome and potential sites for the evolution of environment  
577 adaptation genes such as those encoding effectors [83, 84]. However, genes  
578 encoding effector candidates were not significantly closer to telomeres than  
579 other genes present in the *E. festucae* genome ( $P < 0.787$ ) (Fig 1C).

580 Transposable elements are increasingly seen as important regulators of  
581 gene expression [85, 86], and miniature inverted-repeat transposable elements  
582 (MITES) have been postulated to play a role in the expression of *E. festucae*  
583 genes *in planta* [24, 26]. For this reason, the distance between genes encoding  
584 effector candidates and MITES was analyzed in the *E. festucae* genome. This  
585 analysis revealed that genes encoding effector candidates are more likely to  
586 contain a MITE within 2 kb of their transcription start site than non-secreted  
587 proteins ( $P = 3.56e-18$ , Fig 1D). Genes encoding other secreted proteins were  
588 also more likely to contain a MITE immediately upstream of their transcription  
589 start site than non-secreted proteins ( $P = 1.66e-7$ ). No particular MITE family is  
590 over-represented within 2 kb of these genes.

591 Apart from the physical organization of effector genes within fungal  
592 genomes, the expression of these genes often follows distinct host colonization  
593 patterns and are generally more highly expressed *in planta* than in axenic  
594 culture [72, 87, 88]. We therefore analysed the transcript expression profiles of  
595 the three different gene categories between *E. festucae* grown *in planta* and in  
596 axenic culture. Genes encoding effector candidates were significantly more  
597 highly expressed *in planta* (mean  $\log_2$  fold difference = 1.20,  $P < 2e-16$ ) (Fig 2A).  
598 Other secreted proteins were also moderately more highly expressed *in planta*  
599 (mean  $\log_2$  fold difference = 0.20,  $P = 0.004$ ) (Fig 2A).

600           Given genes encoding effector candidates are preferentially silenced in  
601 axenic culture compared to *in planta* we examined whether this might be due  
602 to the chromatin state as shown for *L. maculans* where RNAi-induced silencing  
603 of DIM-5, a histone H3 lysine 9 trimethyl transferase, and heterochromatin  
604 protein 1 (HP1), led to de-repression of effector gene expression in axenic  
605 culture [89]. We therefore compared expression of *E. festucae* genes encoding  
606 effector candidates in a *hepA* (homolog of *HP1*) mutant versus wild type. We  
607 found candidate effector genes were moderately more highly expressed in the  
608 *hepA* mutant (mean  $\log_2$  fold difference= 0.310,  $P= 4.13e-9$ ) (Fig 2B). For some  
609 genes, this change in gene expression was substantial. Eleven percent of  
610 putative effectors showed  $\log_2$  fold difference in expression greater than 2, a  
611 significantly higher proportion than observed in larger secreted (1.5% of genes,  
612  $P= 5e-14$ ) or non-secreted proteins (3% of genes,  $P= 1e-4$ )).

613           Previously we showed that disruption of the usually asymptomatic  
614 interaction between *L. perenne* and *E. festucae* by infecting the host with  
615 symbiotic mutants of *E. festucae* results in major changes in the fungal  
616 transcriptome [47]. We therefore tested whether effector candidate gene  
617 expression changed in the  $\Delta sakA$ ,  $\Delta noxA$ ,  $\Delta proA$  and  $\Delta hepA$  symbiotic mutants  
618 using previously generated transcriptome data sets [47](Tetsuya & Scott,  
619 personal communication). Generally, genes encoding effector candidates were  
620 upregulated in each of the dysfunctional interactions (mean difference of 0.411  
621  $\log_2$  fold units,  $P = 5.28 \times 10^{-8}$ ) (Fig 2C). A closer investigation showed that ten  
622 genes encoding effector candidates SspB-SspK were consistently upregulated  
623 across all four different mutant interactions and three genes encoding effector

624 candidates SspM-SspO were consistently down regulated [47](Tetsuya &  
625 Scott, personal communication).

626 In summary, the genes encoding effector candidates from *E. festucae*  
627 do not show a distinct distribution pattern as has been described for some other  
628 fungi, but seem to be evenly dispersed throughout the genome. These genes  
629 do not cluster, and are not preferentially located in AT-rich isochores or  
630 telomeres. However, these genes are enriched with respect to their proximity  
631 to MITES. As found for many other fungi, a significant number of genes  
632 encoding effector candidates from *E. festucae* are preferentially upregulated *in*  
633 *planta*. Furthermore, many of these genes are upregulated in symbiotic mutants  
634 of *E. festucae* that disrupt the restrictive pattern of growth observed for WT *E.*  
635 *festucae*.

636  
637

638 **Fig 1. Physical properties of genes encoding effector candidates in *E.***  
639 ***festucae*.**

640 (A) Location of genes encoding effector candidates (black circles) on the seven  
641 chromosomes of *E. festucae* strain FI1. The blue line indicates AT richness in  
642 a 1,000 bp window. (B) Distance of each *E. festucae* gene from AT-rich regions  
643 (isochores). (C) Distance of each *E. festucae* gene from telomeres. (D)  
644 Distance of each *E. festucae* gene from MITES. Genes are divided into the  
645 categories 'non-secreted' (n= 7783), 'secreted' (n= 541) and 'effector  
646 candidates' (n= 141).

647

648 **Fig 2. Analysis of gene expression in WT *E. festucae* and symbiotic**  
649 **mutants of *E. festucae* grown.** (A) Log<sub>2</sub> fold difference in gene expression

650 between WT *E. festucae* grown *in planta* and in culture. (B) Log<sub>2</sub> fold difference  
651 in gene expression between WT and a *hepA* deletion strain grown in culture.  
652 (C) Log<sub>2</sub> fold difference in gene expression between WT and  $\Delta noxA$ ,  $\Delta proA$ ,  
653  $\Delta sakA$  and  $\Delta hepA$  strains grown *in planta*. Number of genes in each category:  
654 'non-secreted', n= 7783; 'secreted', n= 541; and 'effector candidates', n= 141.  
655

## 656 Sequence analysis of downregulated effector candidates

657

658 To gain further insight into the role of *E. festucae* effectors in the symbiotic  
659 interaction with *L. perenne*, the three genes described above (*sspM*,  
660 EfM3.016770; *sspN*, EfM3.062700; and *sspO*, EfM3.014350) that were found  
661 to be downregulated in all four symbiotic mutant interactions, were selected for  
662 genetic analysis [47](Tetsuya & Scott, personal communication). The fact that  
663 they were among the top 100 genes upregulated *in planta* compared to axenic  
664 culture was an additional criterium for selecting these three genes (Fig 2A, S4  
665 Table). A fourth gene, *gpiB* (EfM3.018200), encoding a putative GPI-anchored  
666 protein, was also selected for functional analysis because it had an identical  
667 expression profile to *sspM*, *sspN* and *sspO* [47], and because GPI-anchored  
668 proteins are known to have important roles in fungal virulence [42, 43].

669 cDNA sequencing confirmed that the proposed gene models for each of  
670 these four genes were correct. In the case of *sspN*, where two alternatively  
671 spliced forms were proposed the second of these (mRNA-2) corresponded to  
672 the cDNA sequence. The *gpiB* gene (EfM3.018200) is predicted to encode a  
673 protein of 126 aa with an unmodified MW of 12.61 kDa (8.7 kDa without

674 secretion signal and C-terminus beyond the omega cleavage site), while the  
675 *sspM* gene (EfM3.016770) is predicted to encode a protein of 177 aa with an  
676 unmodified MW of 18.87 kDa (17.1 kDa without secretion signal). The protein  
677 encoded by *sspN* (EfM3.062700) is predicted to be 127 aa in length with an  
678 unmodified MW of 14.98 kDa (13.19 kDa without secretion signal), while the  
679 protein encoded by *sspO* (EfM3.014350) is predicted to be 104 aa in length  
680 with an unmodified MW of 11.11 kDa (9.4 kDa without secretion signal) (Fig 3).

681 Analysis of the selected protein sequences with InterproScan [90],  
682 SMART [91], T-Reks [92] and HHPRED [93] did not identify any conserved  
683 domains with known function, but did predict a number of different structural  
684 features and secondary modifications (Fig 3). *GpiB* contains a predicted *N*-  
685 glycosylation motif as well as a putative C-terminal GPI anchor. The *SspM*  
686 protein contains a possible pre-pro domain ending with a classical LxKR kexin  
687 cleavage site motif and a predicted *N*-glycosylation site. *SspN* is a repeat-  
688 containing protein, consisting of 7.5 almost perfect repeats of 15 aa. Like *SspM*,  
689 it also contains a putative kexin cleavage site. Analysis of the *SspO* sequence  
690 did not reveal any obvious structural features. Both *SspM* and *SspO* are rich in  
691 cysteines; *SspO* containing eight and *SspM* containing six downstream of the  
692 cleavage site, whereas *SspN* and *GpiB* are cysteine-free (Fig 3).

693 A BLASTn analysis of the four selected genes revealed a patchy  
694 distribution within the *Epichloë* species, with only *gpiB* present in all analyzed  
695 genomes available on the Kentucky Endophyte Database [94]. The observed  
696 distribution patterns did not correlate with specific hosts or the sexual  
697 phenotype of the fungus (S5 Table). Alignment of the protein sequences of  
698 interest with the corresponding homologs in other *Epichloë* species showed

699 that GpiB and SspO are highly conserved (S1A and S1D Figs). Interestingly,  
700 SspM was highly conserved from the N-terminus to the proposed kexin  
701 cleavage site and less conserved beyond this site (S1B Fig). The repeat  
702 structure of SspN was also conserved, with homologs mainly differing in their  
703 number of repeats (S1C Fig). A BLASTp analysis identified homologs of Ssps  
704 and GpiB in species outside of *Epichloë* (S4 Table); however, none of these  
705 are functionally characterized.

706

707 **Fig 3. Schematic representation of the small secreted proteins SspM,**  
708 **SspN, SspO (effector candidates) and the GPI-anchored protein GpiB and**  
709 **their corresponding genes.** GpiB (EfM3.018200) is encoded by a 381 bp  
710 gene that lacks introns, and is predicted to encode a protein of 126 aa. The  
711 gene encoding the predicted 177 aa SspM (EfM3.016770) is 630 bp in size and  
712 contains one intron. SspN (EfM3.062700) is encoded by a gene of 430 bp, with  
713 one intron, and encodes a predicted protein of 127 aa. SspO (EfM3.014350) is  
714 encoded by a 398 bp gene, containing one intron, and is predicted to be encode  
715 a protein of 104 aa. N-terminal secretion signals (SS) are indicated by blue  
716 boxes and post-translational modifications and structural motifs by pink bars  
717 (*N*-glycosylation), grey bars (GPI anchor modification site), facing arrows  
718 (protease cleavage site), hollow ovals (repeats) and small black bars (cysteine  
719 residues).

720

721 **GpiB, SspM, SspN and SspO are secreted**

722 To experimentally verify secretion of the three selected candidate effectors and  
723 the GPI anchored protein, GpiB, a complementation assay was performed in

724 *S. cerevisiae*. The nucleotide sequence encoding the secretion signal predicted  
725 by SignalP was ligated in frame to the N-terminus of the *S. cerevisiae* invertase  
726 *SUC2* encoded on the pSUC2T7M13ORI vector [52]. These constructs were  
727 then transformed into the *SUC2*-negative yeast strain YTK12 and tested for  
728 growth on CMDRAA medium, which contains raffinose as the sole carbon  
729 source. All four test strains expressing the secretion signal-Suc2 fusion protein  
730 grew on this medium whereas the strain expressing Suc2 without a secretion  
731 signal and the untransformed YTK12 did not (Fig 4). These results indicate that  
732 the signal peptides of SspM, SspN, SspO and GpiB are sufficient to mediate  
733 secretion in *S. cerevisiae*.

734

735 **Fig 4. Analysis of the GpiB, SspM, SspN and SspO secretion signals in a**  
736 ***S. cerevisiae* complementation assay.** YTK12 strains transformed with  
737 pSUC2T7M13ORI encoding *SUC2* transcriptionally fused to *gpiB*, *sspM*, *sspN*  
738 or *sspO* secretion signal nucleotide sequence, as well as the empty vector and  
739 YTK12-only controls. Only strains expressing the secretion signal-Suc2 fusion  
740 proteins were able to grow on defined medium with raffinose as carbon source  
741 (CMDRAA). SS, secretion signal. All strains grew on the control plates  
742 containing YPDA media.

743

744 **Analysis of secretion and processing of GpiB, SspM, SspN**  
745 **and SspO in *E. festucae***

746 As discussed above, many effectors are post-translationally processed (e.g. by  
747 proteolytic cleavage) or modified (e.g. by glycosylation) to their final form. To  
748 verify the secretion of these proteins in *E. festucae*, and to check if they are

749 modified (Fig 3), His-tagged fusions of GpiB, SspM, SspN and SspO were  
750 purified from extracts of *E. festucae* mycelia (intracellular form), as well as from  
751 the liquid culture medium (extracellular form), separated by PAGE and  
752 analyzed by western blotting (Fig 5). All four proteins were present in extracts  
753 from fungal mycelia. The 13 kDa band for GpiB is larger than the predicted His-  
754 tagged size of 9.8 kDa, possibly due to the addition of the GPI anchor and/or  
755 modification by *N*-glycosylation. A band corresponding to SspN was detected  
756 at approx. 14 kDa, which agrees with the predicted His-tagged size of 14.31  
757 kDa for the unprocessed protein, indicating that under the growth conditions  
758 used, this protein is not cleaved, even though it has a predicted kexin cleavage  
759 site. The signal for SspO was very faint, and slightly larger (12 kDa) than the  
760 predicted His-tagged size of 10.5 kDa for this protein. In contrast, two bands of  
761 20 and 16 kDa were detected for SspM, with the band of higher molecular  
762 weight being very faint. SspM has a predicted His tagged size of 18.22 kDa in  
763 the unprocessed form (with its predicted pro-domain) and 12.7 in the cleaved  
764 form (without its predicted pro-domain). Taking into account a probable  
765 increase in size due to the predicted *N*-glycosylation, the sizes observed for  
766 SspM agrees with the predicted sizes of the kexin-unprocessed and processed  
767 forms, respectively. The presence of additional bands on the western is  
768 probably the result of non-specific binding to other proteins present in the crude  
769 extract separated on these gels.

770 Analysis of the culture medium identified bands for SspO and SspM, but  
771 the latter was only detected when the culture medium was buffered to pH 6.5  
772 with 50 mM HEPES. The bands detected for SspO and SspM were the same  
773 size as those seen in the mycelial fraction, with the latter again present as a



774 double band. These results suggest that SspO does not contain any secondary  
775 modifications and is secreted into the culture medium, whereas SspM is  
776 processed at the predicted kexin site. The absence of bands for GpiB and SspN  
777 in the culture medium suggest that these proteins are either unstable in the  
778 culture medium or remain attached to the fungal hyphae following secretion.  
779

780 **Fig 5. Western blot analysis of GpiB-His, SspM-His, SspN-His and SspO-**  
781 **His extracted from *E. festucae* mycelia and culture medium.** Genes of  
782 interest (*gpiB*, *sspM*, *sspN* and *sspO*) were translationally fused to an 8x His  
783 tag at the C-terminus and constructs were placed under the control of the *Ptef*  
784 overexpression promoter. Total protein was extracted from fungal mycelia and  
785 the corresponding growth medium, and His-tagged proteins purified on Ni-NTA  
786 spin columns eluted with increasing concentrations of imidazole. Samples were  
787 separated on a 15% SDS PAGE gel, transferred to membranes and probed  
788 with an anti-His antibody. SspM-His was extracted from *E. festucae* strains  
789 grown in medium buffered to pH 6.5 with 50 mM HEPES. Predicted sizes of  
790 proteins were calculated on the basis that each protein lacked the secretion  
791 signal and had the 8x His-tag.

792

### 793 Functional analysis of *gpiB*, *sspM*, *sspN* and *sspO*

794

795 To investigate whether *sspM*, *sspN*, *sspO* or *gpiB* are necessary for  
796 establishing a mutualistic symbiotic interaction, given their expression is  
797 downregulated in three different symbiotic mutants [47], each gene was  
798 individually deleted in the WT background using a gene replacement approach.

799 Replacement constructs, pBH1–4, were prepared, and PCR-amplified linear  
800 fragments of each were transformed into WT protoplasts. Putative gene  
801 replacements were identified by PCR screening approx. 200 independent Hyg<sup>R</sup>  
802 transformants with primers that flank the site of *hph* integration. Additional PCR  
803 screening with primer sets that amplify the left and right flanks of each of the  
804 insertion sites was used to confirm the transformants selected had gene  
805 replacements. Southern blot analysis of genomic DNA extracted from these  
806 strains identified three independent deletion strains for *gpiB* (T111, T133,  
807 T148), *sspM* (T52, T99, T163) *sspO* (T78, T195, T210), and *sspN* replacement  
808 (T10, T30, T52) (S2 Fig).

809 To determine the phenotype of the deletion strains in culture, the whole  
810 colony morphology of each independent deletion strain was compared to that  
811 of WT, which is typically circular with white fluffy mycelium that thins and flattens  
812 towards the edges. This comparison revealed that the whole colony  
813 morphology of each deletion strain was indistinguishable from WT (Fig 6).  
814 Given this result, the hyphal morphology was more closely analysed by  
815 microscopy. *E. festucae* WT had smooth hyphal tips with hyphae arranged in  
816 bundles that are thicker in the more mature inner zone of the colony. Hyphae  
817 of WT had hyphal bridges, which are formed by tip-to-side fusion [40], as well  
818 as hyphal coil structures, which are thought to promote conidiophore formation  
819 [40]. When stained with Calcofluor white, which preferentially binds to chitin,  
820 the cell walls of WT hyphae uniformly fluoresced. Similar to the whole-colony  
821 comparison, each of the deletion strains had an indistinguishable phenotype to  
822 that of WT, forming hyphal bundles, with occasional hyphal fusion, and coil  
823 formation (Fig 6).

824 To determine the host interaction phenotype, strains were inoculated  
825 into *L. perenne* seedlings and the phenotype of infected plants examined eight  
826 weeks post-planting. At this time point, WT infected plants typically have 2–6  
827 tillers that are up to 50 cm in length (Fig 7). Plants infected with the deletion  
828 mutants had the same interaction phenotype as those infected with WT, with  
829 no statistically significant difference in either the number or length of tillers (Fig  
830 7). To analyse the cellular phenotype of the infected plants, pseudostem cross  
831 sections were fixed and embedded in resin, and slices stained with Toluidine  
832 blue. WT-infected samples typically have one to two hyphae per intercellular  
833 space and never colonize the vascular bundle tissue (Fig 8). The mutant-  
834 infected plants had the same cellular phenotype as WT plants, with one to two  
835 hyphae per intercellular space and no hyphae within the vascular bundles (Fig  
836 8). Given these results, samples were then prepared for TEM, to give better  
837 resolution of the cellular phenotype. The cellular structure of tissue infected with  
838 *E. festucae* mutants was indistinguishable from WT (Fig 8). In addition,  
839 longitudinal leaf sections were infiltrated with wheat germ agglutinin, a chitin-  
840 binding lectin, conjugated to AlexaFluor 488 (WGA-AF488), as well as aniline  
841 blue, a  $\beta$ -glucan-binding dye, and analysed by confocal laser scanning  
842 microscopy (CLSM). Leaves infected with WT typically had one hypha (red  
843 pseudocolor, aniline blue) with regularly spaced septa (blue pseudocolor,  
844 WGA-AF488) growing between plant cells (Fig 9). These hyphae occasionally  
845 branched and where tips of branches meet, fused to establish a hyphal network  
846 throughout the leaf tissue (Fig 9). The morphology and growth pattern of the  
847 mutant hyphae were indistinguishable from WT (Fig 9).

848           Next we tested whether these mutants could be vertically transmitted  
849 into the seeds of *L. perenne*. Plants infected with each of the individual  
850 transformants were vernalized and ovaries collected from flowers for CLSM and  
851 seed collected from mature inflorescences to test for endophyte in each of  
852 these tissues. Endophyte was shown to be present in ovaries of some of the  
853 flowers collected from plants infected with  $\Delta gpiB$ ,  $\Delta sspM$  and  $\Delta sspN$  mutants  
854 but not  $\Delta sspO$  (S3 Fig; S6 Table). Seeds of  $\Delta gpiB$  (2/43),  $\Delta sspM$  (25/90) and  
855  $\Delta sspN$  (14/70) were immunopositive indicating that these three mutants were  
856 vertically transmitted (S6 Table). However, none of the seeds infected with  
857  $\Delta sspO$  (0/60) were found to contain endophyte suggesting this mutant was  
858 unable to be transferred to the seed.

859           In summary, deletion of *gpiB*, *sspM* and *sspN* does not result in any  
860 obvious culture or plant interaction phenotype, suggesting that the proteins  
861 encoded by these genes are not essential for any of these growth processes.  
862 Similarly, *sspO* appears to be dispensable for most of these growth processes  
863 but may be important for vertical transmission within the host grass.

864

865 **Fig 6. Culture phenotype of WT and deletion mutant strains.** (A)-(D)  
866 Representative DIC images captured with the inverted microscope of WT and  
867 deletion mutant strains grown on 1.5% water agar for 6 days. (A) Hyphal bundle  
868 formation. (B) Hyphal fusion points. (C) Hyphal coils. (D) Hyphal tips. (E)  
869 Hyphae stained with Calcofluor white to examine cell wall composition. (F)  
870 Colony morphology of WT compared to the deletion strains grown on 2.4% PDA  
871 for 7 days. Bar: 20  $\mu$ m.

872

873 **Fig 7. Plant phenotype of *L. perenne* infected with *E. festucae* WT and**  
874 ***gpiB*, *sspM*, *sspN* and *sspO* deletion mutant strains.** (A-D) Whole plant  
875 phenotype of WT and deletion mutant-infected *L. perenne* plants 8 weeks post-  
876 planting. (E and F) Box plots representing tiller number (E) and length (F) of  
877 ryegrass plants 8 weeks post-planting infected with *E. festucae* WT (n=6) and  
878  $\Delta gpiB$  (n=9/9/5),  $\Delta sspM$  (n=10/15/13),  $\Delta sspN$  (n=13/8/8) and  $\Delta sspO$  (n=7/8/9)  
879 mutant strains. One-way ANOVAs were used to test for differences in both plant  
880 phenotypes between wildtype and modified strains. In each case the ANOVA  
881 was fitted with R and a Bonferroni correction was applied to all p-values to  
882 account for multiple testing.

883

884 **Fig 8. Light microscopy and transmission electron micrographs of the *in***  
885 ***planta* cellular phenotype of *E. festucae* WT and *gpiB*, *sspM*, *sspN* and**  
886 ***sspO* deletion mutant strains.** (A) Light microscope analysis of fixed *L.*  
887 *perenne* pseudostem cross sections stained with Toluidine blue. The focus of  
888 the section is on the vascular bundles and surrounding regions; Bar= 10  $\mu$ m.  
889 (B) TEM analysis of hyphal growth in the host apoplast; Bar= 2  $\mu$ m. (C)  
890 Magnified transmission electron micrograph of one single hypha; Bar= 1  $\mu$ m.  
891 Representative images from one of the independent mutants for each gene.  
892 Red arrows indicate position of hyphae and green arrows epiphyllous hyphae.

893

894 **Fig 9. Confocal depth series images of *in planta* cellular phenotype of *E.***  
895 ***festucae* WT and *gpiB*, *sspM*, *sspN* and *sspO* deletion mutant strains.**  
896 Infected *L. perenne* pseudostem samples were stained with aniline blue/WGA-  
897 AF488. Hyphae show aniline blue fluorescence of  $\beta$ -glucans (red pseudocolor)

898 and chitin staining of septa with WGA-AF488 (blue pseudocolor). (A)  
899 Representative growth of WT and deletion strains *in planta* ( $z= 15 \mu\text{m}$ ); Bar=  
900  $20 \mu\text{m}$ . (B) Magnification of the area boxed with white dashed lines in A,  
901 showing representative growth of the strains in more detail ( $z= 15 \mu\text{m}$ ); Bar=  $20$   
902  $\mu\text{m}$ . (C) Representative hyphal branching and fusion of WT and deletion strains  
903 *in planta* ( $z= 5 \mu\text{m}$ ); Bar=  $10 \mu\text{m}$ .

904

### 905 Culture and *in planta* phenotype of overexpression strains

906 As the deletion of the four genes did not result in any obvious plant interaction  
907 phenotype, overexpression (OE) constructs were generated using the  
908 translation elongation factor (*tef*) promoter from *Aureobasidium pullulans*,  
909 which is commonly used for OE studies [37, 67]. Plasmids encoding the *gpiB*,  
910 *sspM*, *sspN* and *sspO* OE constructs (pBH29–32) were prepared and  
911 transformed into WT protoplasts and the copy number of 10 independent  
912 transformants for each construct determined (S4 Fig). A total of three strains  
913 per construct, each with a different copy number, were chosen for further  
914 analysis. In addition, the relative expression level of the gene in each of the  
915 three independent strains was determined and found to generally correlate with  
916 the copy number (S4 Fig). No difference in culture growth or morphology was  
917 observed between the OE strains and WT. To test the plant symbiotic  
918 phenotype, the OE strains were inoculated into *L. perenne* seedlings and  
919 infected plants examined 8 weeks post-planting. No difference in whole plant  
920 (Fig 10) or cellular phenotype (Fig 11) was observed between the OE strains  
921 and WT. In summary, these results demonstrate that overexpression of *gpiB*,

922 *sspM*, *sspN* or *sspO* has no impact on the culture or whole plant interaction  
923 phenotype.

924

925 **Fig 10. Plant phenotype of *Lolium perenne* infected with *E. festucae* WT**  
926 **and *gpiB*, *sspM*, *sspN* and *sspO* OE strains.** (A-D) Whole plant phenotype  
927 of WT and OE strain-infected *L. perenne* plants 8 weeks post-planting. (E and  
928 F) Boxplots representing tiller number (E) and length (F) of ryegrass plants eight  
929 weeks post-planting with *E. festucae* WT (n= 2) and *gpiB* (n= 2/6/4), *sspM* (n=  
930 3/2/6), *sspN* (n= 2/7/3) and *sspO* (n= 4/4) OE strains. One-way ANOVAs were  
931 used to test for differences in both plant phenotypes between wildtype and  
932 modified strains. In each case the ANOVA was fitted with R and a Bonferroni  
933 correction was applied to all p-values to account for multiple testing.

934

935 **Fig 11. Confocal depth image series of *in planta* cellular phenotype of *E.***  
936 ***festucae* WT and *gpiB*, *sspM*, *sspN* and *sspO* OE strains.** Infected *L.*  
937 *perenne* pseudostem samples were stained with aniline blue/WGA-AF488.  
938 Hyphae show aniline blue fluorescence of  $\beta$ -glucans (red pseudocolor) and  
939 chitin staining of septa with WGA-AF488 (blue pseudocolor). (A)  
940 Representative growth of WT and OE strains *in planta* (z= 15  $\mu$ m); Bar= 20  $\mu$ m.  
941 (B) Magnification of the area boxed with white dashed lines in A, showing  
942 representative growth of the strains in more detail (z= 15 nm); Bar= 20  $\mu$ m. (C)  
943 Hyphal branching and fusion of WT and OE strains *in planta* (z= 5 nm); Bar=  
944 20  $\mu$ m.

945

946 SspM, SspN and SspO localize extracellularly

947 To test whether SspM, SspN and SspO are translocated to the cytosol of the  
948 host, we generated C-terminal mCherry fusion constructs of each protein under  
949 the control of their native promoters. These constructs also contained three C-  
950 terminal tandem repeats of the simian virus large T-antigen nuclear localization  
951 signal to target the fusion proteins to the host nucleus, to enhance the signal in  
952 the cell if the proteins are translocated to the plant cytosol [60]. The constructs  
953 were transformed into protoplasts of their respective deletion strain, together  
954 with a vector encoding cytoplasmic eGFP to facilitate identification of hyphae  
955 among the plant cell background. Transformants were screened by PCR for  
956 presence of the construct and then inoculated into *L. perenne* seedlings. Leaf  
957 tissue was harvested from mature infected plants and examined by CSLM for  
958 mCherry localization. Although the fluorescence from the mCherry fusion  
959 proteins was generally weak *in planta*, a signal of sufficient intensity was  
960 detected from SspM-mCherry-NLS and SspO-mCherry-NLS in the apoplast on  
961 either side of the hyphae. For SspN-mCherry-NLS, the signal was so weak that  
962 a localization profile for this protein in endophytic hyphae was not possible. No  
963 evidence was found for localization of any of the three constructs to the plant  
964 nucleus despite examining many individual sections and fields from different  
965 plants inoculated with other transformants. By contrast, the signal for mCherry  
966 in epiphyllous hyphae on the leaf surface was relatively strong and distinctly  
967 localized along the cell walls for all three constructs, demonstrating that the  
968 proteins were secreted *in planta*, but appear to remain attached to the hyphal  
969 cell surface (Fig 12). These observations indicate that SspM, SspN and SspO  
970 are secreted into the apoplast and may remain attached to the hyphal cell  
971 surface post-secretion.



972

973 **Fig 12. Confocal micrographs of the localization of SspM-mCherry-NLS,**  
974 **SspN-mCherry-NLS and SspO-mCherry-NLS in endophytic and**  
975 **epiphyllous hyphae of *E. festucae* in mature *L. perenne* plants.** Besides  
976 the mCherry constructs each transformant contained eGFP to facilitate  
977 identification of the hyphae *in planta*; Bar= 10 µm.

978

979 SspM, SspN, SspO and GpiB do not elicit a defense  
980 response in *N. benthamiana* or *N. tabacum* and do not  
981 suppress INF1-triggered immunity in *N. benthamiana*

982

983 Several fungal effector proteins have been shown to activate the plant immune  
984 system (i.e. to trigger a cell death immune response) in non-host plants upon  
985 their recognition as ‘invasion patterns’ by corresponding plant immune receptor  
986 proteins [95]. To test whether non-host plants are able to recognize GpiB or the  
987 Ssps, as invasion patterns, each was expressed in *N. benthamiana* and *N.*  
988 *tabacum* leaf tissue using an *A. tumefaciens* transient expression assay and  
989 screened for an associated cell death response. For this purpose, the cDNA  
990 sequence encoding each mature protein (i.e. lacking a native secretion signal)  
991 was fused to the nucleotide sequence encoding the *N. tabacum* PR1α secretion  
992 signal (for secretion to the plant apoplast) and 3xFLAG (for detection by  
993 western blot), and ligated into the pICH86988 expression vector by Golden  
994 Gate cloning. The resulting expression vectors were then transformed into *A.*  
995 *tumefaciens* strain GV3101. Strains confirmed to contain the correct construct

996 were infiltrated into leaves of approx. five-week old *N. benthamiana* and *N.*  
997 *tabacum* plants, and the expression of GpiB and the three Ssps verified by  
998 western blotting using an antibody to the FLAG-Tag (S5 Fig). Plants were  
999 examined for any sign of a cell death response at one-week post-infiltration. As  
1000 expected, the positive control, INF1 from *Phytophthora infestans* (a PAMP),  
1001 triggered a strong cell death response in both *N. benthamiana* and *N. tabacum*  
1002 (Figs 13A and B). As expected, the negative control, pICH86988 empty vector,  
1003 failed to trigger cell death in these plants (Figs 13A and B). Unlike INF1,  
1004 however, neither GpiB, nor the three Ssps, triggered cell death in *N.*  
1005 *benthamiana* and *N. tabacum* (Figs 13A and B) suggesting that they are not  
1006 recognized as invasion patterns by these non-host plants.

1007 Many fungal effector proteins are anticipated to suppress activation of  
1008 the plant immune response [1]. With this in mind, we next examined whether  
1009 any of the four proteins are able to suppress the cell death response elicited by  
1010 the INF1 PAMP in *N. benthamiana*, a model plant system for testing for this  
1011 response. As before, responses were evaluated one-week post-infection. For  
1012 this experiment, leaves were first infiltrated with the *A. tumefaciens* strain  
1013 containing an expression vector for GpiB or one of the three Ssps. After 24 h,  
1014 the same infiltration zone was infiltrated with the *A. tumefaciens* strain  
1015 containing the INF1 expression vector. As the outcome of this experimental  
1016 design is very sensitive to environmental influences, appropriate controls were  
1017 included for each independent experiment. As expected, infiltration of an *A.*  
1018 *tumefaciens* strain containing an expression vector for the *P. infestans* effector  
1019 Avr3a 24 h after the corresponding potato resistance protein R3 resulted in a  
1020 strong cell death response (Figs 13C and D). As expected, infiltration of an *A.*

1021 *tumefaciens* strain containing an expression vector for eGFP 24 h before INF1,  
1022 gave a strong cell death response, demonstrating that eGFP is not able to  
1023 suppress the cell death response caused by INF1 (Figs 13C and D). When Avr3  
1024 was infiltrated 24 h before INF1, the PAMP-triggered cell death response  
1025 normally elicited by INF1 was strongly suppressed (Figs 13C and D), confirming  
1026 a previous study showing that Avr3a is able to suppress INF1-triggered cell  
1027 death in *N. benthamiana* [96]. Unlike the results shown for Avr3a, infiltration of  
1028 the three Ssps or GpiB, did not result in suppression of INF1-triggered cell  
1029 death (Figs 13C and D).

1030 Taken together, these experiments show that neither the Ssps, nor GpiB, are  
1031 recognized by the non-host plants *N. tabacum* and *N. benthamiana*, and that  
1032 these proteins are unable to suppress the cell death response triggered by  
1033 INF1.

1034

1035 **Fig 13. A. *tumefaciens* transient expression assays of GpiB, SspM, SspN**  
1036 **and SspO in the non-host plants *N. benthamiana* and *N. tabacum*.** (A) *N.*  
1037 *benthamiana* and (B) *N. tabacum* leaf phenotypes in response to *A.*  
1038 *tumefaciens* transient expression assays involving GpiB, SspM, SspN, SspO  
1039 or INF1. INF1 triggers a strong cell death response, whereas the pICH86988  
1040 empty vector had no effect. (C and D) INF1-triggered cell death suppression  
1041 assays in *N. benthamiana*. GpiB or any of the three Ssps were unable to  
1042 suppress INF1-triggered cell death in *N. benthamiana*. eGFP was used as a  
1043 negative control, INF1/Avr3a as a suppression control, and Avr3a/R3a as cell  
1044 death positive control. All photos were taken one-week post-infiltration.

1045

## 1046 Discussion

1047 Effectors of plant-pathogenic fungi function to promote host colonization,  
1048 typically by suppressing the plant immune system. Current evidence, based on  
1049 a small number of functionally characterized effectors from root endophytes  
1050 [16-19], suggests that effectors from plant-mutualistic fungi play a similar role.  
1051 In this study, we identified a suite of candidate effectors from the mutualistic  
1052 symbiotic fungus *E. festucae*. We then performed an in-depth functional  
1053 analysis in an attempt to uncover a role for three candidate effectors,  
1054 representing some of the most highly expressed candidate effectors from this  
1055 fungus *in planta*, in the mutualistic symbiotic interaction of *E. festucae* with *L.*  
1056 *perenne*.

1057 Making use of the completely annotated genome of *E. festucae* strain  
1058 FI1 and a combination of SignalP, EffectorP and protein size restriction we  
1059 identified 141 genes encoding putative effectors. Eighty-three of these genes  
1060 are homologous to uncharacterized proteins from other Sordariomycete  
1061 genera, while a further nine have homologs in other *Epichloë* species. The  
1062 repertoire of effectors present in the genome thus includes conserved proteins  
1063 that may support somewhat generalized host-adaptation and a number of  
1064 apparently lineage-specific genes. Effectors are known to contribute to host  
1065 specificity in other plant-associated fungal species [97-99], and we predict  
1066 some of the apparently lineage-specific effectors identified here will contribute  
1067 to specific host interactions in *Epichloë* strains.

1068 Having a complete and finished *E. festucae* genome sequence enabled  
1069 us to test for association between structural features of the genome and genes  
1070 encoding effectors. Our results are remarkable for the lack of associations that

1071 are well-documented in other fungal species. The *E. festucae* genome has a  
1072 “patchwork” structure, in which distinct blocks of highly AT-biased DNA  
1073 comprised almost entirely of TEs are interleaved with gene-rich regions that  
1074 have balanced GC-content. This genome structure is similar to that found in the  
1075 pathogenic fungus *L. maculans*, where effector genes are greatly over-  
1076 represented within AT-rich blocks (comprising 80% of all genes in these  
1077 regions). Similarly, it has been reported that effector-encoding genes are  
1078 located in TE-rich regions of the *M. oryzae* [100], *Blumeria graminis* [101] and  
1079 *F. oxysporum* [102] genomes [103]. In contrast, we found no evidence for  
1080 enrichment of genes encoding candidate effectors in proximity to AT- and  
1081 transposable element-rich regions. Indeed, only 5.7% of the candidate effector  
1082 genes can be found within 1 kb of an AT-rich block and none were found within  
1083 an AT-rich block.

1084         The lack of association between AT-rich blocks in the *E. festucae*  
1085 genome and effectors is made more surprising by the evidence that these  
1086 blocks contribute to plant-specific gene expression of other genes [26]. We  
1087 have recently shown that the patchwork structure of the *E. festucae* genome  
1088 strongly influences the resultant 3D conformation of the chromosomes, where  
1089 AT-rich blocks mainly interact with other AT-rich blocks to generate a highly  
1090 condensed chromatin state compared to the GC and gene-rich blocks. Genes  
1091 specific to *E. festucae* as well as genes highly expressed during the interaction  
1092 with the plant host were found to be overrepresented in proximity to the AT-rich  
1093 blocks [26]. The fact effectors are not associated with the blocks, the rapidly  
1094 evolving sub-telomeric regions, and do not form distinct clusters as found in  
1095 other species, reflect the difference in evolutionary pressures experience by

1096 symbiotic, rather than pathogenic, fungal species. However, we did find an  
1097 enrichment of genes encoding secreted proteins in general and SSPs in  
1098 particular, in proximity to MITEs. MITEs are small, non-autonomous DNA  
1099 transposable elements abundantly distributed in eukaryotic genomes.  
1100 Transposable elements are increasingly seen as important for gene regulation,  
1101 and MITEs have been linked to gene expression traits in a number of species  
1102 [27, 104]. In *E. festucae*, MITEs have been found in the promoter region of key  
1103 secondary metabolite gene clusters [24, 105] and are greatly over-represented  
1104 in the regions upstream of genes preferentially expressed *in planta* [26]. These  
1105 results, and the demonstration here that genes encoding Ssps are frequently  
1106 in close proximity to MITEs, suggests that elements either directly or indirectly  
1107 associated with MITEs may play a key role in regulating the expression of *ssps*.

1108         In the root endophyte *F. oxysporum*, most effector genes are encoded  
1109 on a dispensable TE-rich pathogenicity chromosome [97, 106]. Recently a  
1110 MITE from the mimp family was identified in the promoter region of each of the  
1111 *SIX* effector genes and based on the presence of this mimp in the promoter  
1112 region of other genes, further secreted proteins could be predicted and  
1113 subsequently identified in the xylem sap of infected tomato plants [25].  
1114 Interestingly, deletion of the mimp element from the promoter region of two of  
1115 the *SIX* genes did not significantly change the expression of these genes *in*  
1116 *planta* or culture, thereby ruling out a direct role of this element in transcriptional  
1117 regulation [25]. However, a putative transcriptional regulator (repressor) binding  
1118 element in close proximity to the mimp is important for *SIX* gene expression.  
1119 Whether the MITEs identified in *E. festucae* contribute to transcriptional  
1120 silencing or activation remains to be elucidated.

1121 Expression of effector genes is often induced upon plant infection or at  
1122 a certain stage of host infection [87, 88]. Consistent with this observation we  
1123 found a preferential expression of candidate effector-encoding genes *in planta*.  
1124 Previous work has shown that a major remodeling of the *E. festucae* chromatin  
1125 state occurs upon the switch from growth in axenic culture to growth *in planta*.  
1126 In culture the genome is highly heterochromatic, characterized by high levels  
1127 of H3K9me3 and H3K27me3, whereas *in planta* the genome contains higher  
1128 levels of transcriptionally active euchromatin characterized by much lower  
1129 levels of these two repressive epigenetic marks [68]. While RNAseq data for  
1130 mutants of the responsible methyltransferases was not available, a set of data  
1131 was available for a mutant of the gene encoding heterochromatin protein 1  
1132 (*hepA*). When a comparison was made between the transcriptome of  $\Delta$ *hepA* vs  
1133 WT in axenic culture there was a minor but significant increase in expression  
1134 of the candidate effector genes. Similar results have been obtained in *L.*  
1135 *maculans* where silencing of genes encoding the heterochromatin regulators  
1136 DIM-5, a H3K9 methyl transferase, and heterochromatin protein 1 (HP1)  
1137 resulted in the expression of many effector genes in axenic culture, which were  
1138 repressed in WT [89]. As discussed above, effector genes in *L. maculans* are  
1139 mainly located within the AT isochore component of the genome, which is in a  
1140 highly heterochromatic state in axenic culture [89]. In contrast genes encoding  
1141 *E. festucae* effectors are not associated with the AT-rich blocks of the genome  
1142 and thus were expected to be less affected by heterochromatin silencing.

1143 Previous studies have shown that the deletion of genes coding for NoxA,  
1144 a NADPH oxidase [34], ProA, a transcription factor [39], and Saka, a stress-  
1145 responsive MAP kinase [36], in *E. festucae* result in a severe breakdown in the

1146 symbiotic interaction with the host leading to severely stunted plants. Analysis  
1147 of the fungal transcriptome of these three different interactions identified a core  
1148 set of 182 *E. festucae* genes that were differentially expressed (DE) in the same  
1149 direction in all three symbiosis mutants [47]. Among this core gene set were 14  
1150 genes encoding secreted proteins, corresponding to 10 that were upregulated  
1151 and four (*gpiB*, *sspM*, *sspN* and *sspO*), that were downregulated. The three  
1152 putative effector genes analysed here were among the top 100 DE genes *in*  
1153 *planta* compared to axenic culture.

1154 In order to verify that the predicted secretion signals of the three effector  
1155 candidates and the GPI-anchored protein were functional, a yeast  
1156 complementation assay was carried out [52]. *S. cerevisiae* transformants  
1157 containing each of the four predicted secretion signals fused to SUC2 all grew  
1158 on raffinose confirming these signals are functional. In addition, western blots  
1159 were performed with His-tagged versions of each of the four genes under the  
1160 control of a *tef* promoter to confirm they were secreted and to check for  
1161 proteolytic processing and any potential post-translational modifications. Both  
1162 GpiB and SspM were predicted to be *N*-glycosylated and SspM and SspN  
1163 contain a kexin cleavage site. Proteins of the expected size for GpiB, SspN and  
1164 SspO were detected in extracts of fungal mycelia. For SspM, two signals were  
1165 detected which potentially correspond to the pro-protein and a post-  
1166 translationally modified protein. Some effectors, such as *C. fulvum* Avr4 and  
1167 Avr9 are further processed in the apoplast by either fungal or plant proteases  
1168 [20]. To determine whether there is protease modification of the SspM *in planta*  
1169 and whether this processing is necessary for the activation of SspM will require  
1170 further experimentation using protein extracts obtained from ryegrass



1171 apoplastic fluid. Despite the presence of an LxKR kexin recognition motif in  
1172 SspN, only a single band was detected corresponding to the size of the  
1173 unprocessed protein. Sequence alignment with closely related species shows  
1174 that this motif can only be found in strain FI1, suggesting this might be the result  
1175 of a recent mutation. One possible reason for lack of cleavage at this site could  
1176 be lack of accessibility of this motif within the folded protein. Alternatively, it is  
1177 possible it is only cleaved *in planta* and not in axenic culture. While the function  
1178 of SspN is not known it does have a repeat domain structure which is a common  
1179 feature of several effectors characterized to date including Ecp6 from *C. fulvum*  
1180 [107], which contains multiple LysM domain containing repeats, Sp7 from the  
1181 mutualist *Glomus intraradices* [18], *Colletotrichum graminicola* EP1[108] and  
1182 the recently identified effector Rsp3 from *U. maydis* [6]. However, unlike all  
1183 these proteins, which have been shown by genetic analysis to be very important  
1184 for the interaction with the host, deletion of *sspN* had no obvious plant  
1185 interaction phenotype. Some of these repeat-containing effectors function in  
1186 the apoplast (Ecp6 and Rsp3), whereas others are transported into the host  
1187 cytoplasm (Sp7 and EP1). Due to the adoption of an extended module-like  
1188 structure, some repeat-containing proteins such as EP1 are found to be  
1189 associated with nucleic acids following transport into the host nucleus whereas  
1190 others mediate protein-protein interactions [108-110]. In addition, some repeat-  
1191 containing proteins are located on the surface of the cell where they are  
1192 integrated into the plasma membrane or attached to the cell wall [109]. Rps3 is  
1193 located on the *U. maydis* cell wall where it interacts with the mannose-binding  
1194 and anti-fungal activity of the maize protein AFP1 [6]. Some repeat-containing  
1195 proteins contain kexin cleavage sites between the repeating units resulting in

1196 generation of bioactive peptides. A classic example of this in *Epichloë* is GigA,  
1197 which is processed to generate a series of cyclic peptides called  
1198 epichloëcyclins of unknown biological function [111]. In *U. maydis*, Rep1, is  
1199 processed into smaller peptides that form cell wall associated fibrils mediating  
1200 attachment of the hyphae to hydrophobic surfaces [112, 113].

1201         Although products of all four genes could be detected in the fungal  
1202 mycelium, only SspM and SspO, which contain six and eight cysteines  
1203 respectively, were detected in the culture medium. The lack of detection of GpiB  
1204 in the culture medium was not surprising as the addition of a GPI-anchor  
1205 generally results in cell wall attachment. GPI-anchored proteins are involved in  
1206 multiple processes, including attachment of hyphae to various surfaces, cell  
1207 wall integrity and virulence [42, 43]. The two protein products observed for  
1208 SspM in the media were the same size as those observed in the mycelia. The  
1209 presence of two bands could either indicate that both the modified as well as  
1210 the unmodified protein fulfill a function in *E. festucae* or that the overexpression  
1211 of the gene because of multiple integrations resulted in an overproduction  
1212 compared to the available protease. As the protein however can be detected in  
1213 the modified version in culture and only one band can be detected in the  
1214 western blot on SspM expressing *N. benthamiana* protein extracts, a  
1215 modification by plant proteases to induce activity can probably be excluded.  
1216 The inability to detect SspN in the culture media could be either due to the  
1217 instability of the protein resulting from the lack of cysteines that promote stability  
1218 or due to an attachment of this protein to the cell wall as has been described  
1219 for multiple repeat-containing proteins as discussed above. A single protein  
1220 product of the same size as observed in mycelia was detected in the media of

1221 cultures containing the SspO construct indicating this protein is not post-  
1222 translationally modified. The presence of eight cysteines, which have the  
1223 potential to form four cysteine bridges, is likely to account for the high stability  
1224 of this protein. Given the observed size for SspM was similar to the expected  
1225 size, this proteins is probably not *N*-glycosylated. However the product of the  
1226 His-tagged GpiB was greater than the predicted size, which may be due to  
1227 addition of the GPI anchor and/or modification by *N*-glycosylation. For a  
1228 definitive answer, purified proteins could be analyzed by mass spectrometry or  
1229 subjected to an enzymatic removal of glycosylation followed by a size  
1230 comparison using SDS-PAGE.

1231         Some pathogens such as *U. maydis* produce apoplastic as well as  
1232 cytoplasmic effectors [1], whereas other pathogens such as *C. fulvum* seem to  
1233 only produce apoplastic effectors [72]. In order to determine where the effector  
1234 candidates of *E. festucae* are targeted during host colonization, translational  
1235 fusions were generated between each of the candidate genes and mCherry.  
1236 Given it is difficult to detect effectors in the host cytoplasm, we used the method  
1237 of adding a nuclear localization signal to target the proteins to the plant nucleus,  
1238 as this was shown to be very effective for detecting some *M. oryzae* effectors  
1239 in cells of the host *O. sativa* [60]. Despite examining multiple samples of  
1240 different aged plants, no signal from any of the candidates was observed in the  
1241 nuclei of ryegrass leaf cells. Therefore, the effector candidates are likely to  
1242 reside in the apoplast. Indeed, we were able to show that all three of the effector  
1243 candidates localized to the cell walls or plasma membrane of the fungal hyphae  
1244 *in planta*. The clearest signals were obtained by imaging epiphyllous hyphae  
1245 on the surface of the leaves. While it was more challenging to detect the

1246 localization of these proteins inside the leaf, signals of sufficient intensity were  
1247 detected for both SspM and SspO on the cell walls of endophytic hyphae.  
1248 However, no signal could be detected for SspN in endophytic hyphae which  
1249 could be due to the fact that the promoter of *sspN* is weaker than that of *sspM*  
1250 and *sspO*. Alternatively, SspN may be more unstable in the apoplast than SspM  
1251 and SspO as was suggested by the western analysis. Alternatively, *sspN* may  
1252 be just expressed on the leaf surface. This hypothesis could be tested by fusing  
1253 the promoter of *sspN* to eGFP and analyzing where fluorescence occurs.

1254 To elucidate the role of these proteins in the interaction we generated  
1255 deletion and overexpression strains and analysed their phenotype in axenic  
1256 culture as well as in the interaction with perennial ryegrass. In culture, *E.*  
1257 *festucae* forms white, soft looking colonies with a diameter of approx. 2 cm after  
1258 7 days of growth. Both deletion and overexpression strains were  
1259 indistinguishable from the WT. Within the plant host, *E. festucae* grows  
1260 exclusively in the apoplastic space, where the growth is highly regulated and  
1261 synchronized with the host [114]. In the host meristematic tissue, *E. festucae*  
1262 grows by tip growth, but as hyphal cells grow into the cell expansion zone of  
1263 the leaf, the hyphae switch to intercalary growth, a pattern of growth that  
1264 prevents mechanical shear and enables the hyphae to maintain the same rate  
1265 of growth as the host [114, 115]. Ryegrass plants infected with either the  
1266 deletion or overexpression strains had the same whole plant interaction and  
1267 cellular growth phenotype as WT with one exception. Mutants  $\Delta gpiB$ ,  $\Delta sspM$   
1268 and  $\Delta sspN$  were seed transmitted but not  $\Delta sspO$ . Additional long-term  
1269 experiments will be necessary to determine the mechanism for this interesting  
1270  $\Delta sspO$  phenotype. Also it would be interesting to check whether these mutants

1271 affect the transition from asexual to sexual development but this is difficult to  
1272 investigate as initiation of the sexual cycle requires vernalisation of host  
1273 material, formation of stromata and transfer of spermatia to a stroma of the  
1274 opposite mating type by a *Botanophila* fly [116]. Furthermore, it is possible that  
1275 each of these effector candidates contributes to the interaction in a minor  
1276 incremental way making it difficult to detect a phenotype by deletion of single  
1277 effector gene unless there is a very sensitive phenotype screen [117, 118].

1278         Functional redundancy of effector proteins could also explain the lack of  
1279 an altered host interaction phenotype. Redundancy is thought to be the result  
1280 of multiple effectors having the same or overlapping functions. Notably, a study  
1281 by Weßling and colleagues [119] found effectors from a single pathogen  
1282 species converging on interactions with a small subset of host proteins in a  
1283 process named “interspecies convergence” of which many are involved in high  
1284 level regulatory processes. Interestingly, even effectors from different species  
1285 of pathogens can target a similar subset of host proteins with a correlation  
1286 between the degree of convergence and the relevance of the host protein.  
1287 Therefore homology-independent functional redundancy is maintained as an  
1288 evolutionary benefit and protects against rapid loss of a single effector due to  
1289 host recognition [119, 120]. For example, both Avr4 and Ecp6 prevent chitin  
1290 recognition in the *C. fulvum*-tomato interaction, however, the molecular  
1291 functions are different and there is no sequence homology between these two  
1292 effectors [2, 4].

1293         In the presence of a corresponding host immune receptor protein, fungal  
1294 effectors are known to activate the plant immune system. Often, the main output  
1295 of this activation is the hypersensitive response (HR), which renders the host

1296 resistant and the pathogen avirulent [121]. Notably, a subset of fungal effectors  
1297 can also trigger an HR-like cell death response when expressed in the non-host  
1298 plants *N. benthamiana* or *N. tabacum* (i.e. following their recognition by  
1299 unknown immune receptor proteins) using an *A. tumefaciens* transient  
1300 expression assay. Indeed, multiple effectors of the wheat pathogen *Z. tritici*  
1301 have been found to induce an HR in *N. benthamiana* [95]. Using this approach,  
1302 we tested whether the three candidate effectors of *E. festucae* trigger cell death  
1303 when produced by these two non-host plants but none triggered a cell death  
1304 response. We also tested whether the effector candidates are able to suppress  
1305 a defense response triggered by the *P. infestans* elicitor INF1 using an *A.*  
1306 *tumefaciens* transient expression assay. INF1 functions in the apoplastic space  
1307 where it binds to the ELR (elicitin response) receptor, resulting in activation of  
1308 the plant immune system [122, 123]. Even though these candidate effectors  
1309 localize to the apoplast, none were able to suppress INF1-triggered immunity.

1310         In *E. festucae*-infected *L. perenne* plants, approx. one third of *L. perenne*  
1311 genes were found to be differentially expressed compared to non-infected  
1312 plants. These changes were found to be in the key areas of ‘stress response’,  
1313 ‘primary metabolism’ and ‘secondary metabolism’ [124]. Genes in the category  
1314 ‘primary metabolism’ and ‘stress response’, including PR genes, were found to  
1315 be mainly downregulated, and genes involved in secondary metabolism were  
1316 found to be upregulated [124]. These findings, together with the fact that these  
1317 candidate effectors are so highly expressed in *E. festucae in planta*, suggests  
1318 that these proteins are likely to have a key role in the interaction. Furthermore,  
1319 microscopic studies in infected *L. perenne* plants revealed a lack of chitin, a  
1320 crucial PAMP, in endophytic hyphae [124, 125]. This indicates that chitin is

1321 either masked, potentially by a similar mechanism as has been described for  
1322 Avr4 of *C. fulvum*, or modified.

1323 In this study, we have identified for the first time, a suite of effector  
1324 candidates from the grass endophyte *E. festucae*. Genes encoding effector  
1325 candidates were found to associate with MITEs but not with AT-rich regions or  
1326 TEs, indicating that they might not be under strong selection pressure. Three  
1327 effector candidates were functionally analysed but were found to be  
1328 dispensable for the interaction with *L. perenne* under the growth conditions  
1329 analysed. Although we could not find any evidence for a role for any of these  
1330 effectors in the interaction, the list of effector candidates identified provides a  
1331 good database for selecting other proteins and strategies for functional  
1332 analysis. Sequencing of additional *Epichloë* species will help identify effector  
1333 genes conserved across species or unique to one species and thereby provide  
1334 important insights into the role of these effectors in host specificity in this  
1335 agriculturally important symbiosis.

1336

## 1337 **Acknowledgements**

1338 This research was supported by grants from the Tertiary Education  
1339 Commission to the Bio-Protection Research Centre, the Royal Society of New  
1340 Zealand Marsden Fund (contract MAU1301) and by Massey University. The  
1341 authors thank Jordan Taylor, Niki Murray and Matthew Savoian (Manawatu  
1342 Microscopy and Imaging Centre, Massey University) for assistance with  
1343 microscopy, Arvina Ram and Karolin Warnecke for technical assistance,  
1344 Christopher Schardl for provision of the *Epichloë* database sequences, Melissa  
1345 Guo for provision of strains and advice on *Agrobacterium* infiltration assays,  
1346 and Sophian Kamoun and Barbara Valent for provision of plasmids.

1347

## 1348 **Author contributions**

1349 **Conceptualization:** BH DW CHM CJE BS.

1350 **Data curation:** BH DW.

1351 **Formal analysis:** BH DW CHM.

1352 **Funding acquisition:** BS.

1353 **Investigation:** BS DW.

1354 **Methodology:** BH DW YB CHM CJE BS.

1355 **Project Administration:** BS.

1356 **Resources:** BS.

1357 **Supervision:** CHM CJE BS.

1358 **Writing – original draft:** BH DW CHM BS.

1359 **Writing – review & editing:** CHM CJE BS.

1360



## 1362 **References**

1363

1364 1. Lo Presti L, Lanver D, Schweizer G, Tanaka S, Liang L, Tollot M, et al.

1365 Fungal effectors and plant susceptibility. *Annu Rev Plant Biol.* 2015;66:513-

1366 45. doi: 10.1146/annurev-arplant-043014-114623. PubMed PMID: 25923844.

1367 2. van den Burg HA, Harrison SJ, Joosten MH, Vervoort J, de Wit PJ.

1368 *Cladosporium fulvum* Avr4 protects fungal cell walls against hydrolysis by

1369 plant chitinases accumulating during infection. *Mol Plant-Microbe Interact.*

1370 2006;19(12):1420-30. PubMed PMID: 17153926.

1371 3. van Esse HP, Van't Klooster JW, Bolton MD, Yadeta KA, van Baarlen

1372 P, Boeren S, et al. The *Cladosporium fulvum* virulence protein Avr2 inhibits

1373 host proteases required for basal defense. *Plant Cell.* 2008;20(7):1948-63.

1374 Epub 2008/07/29. doi: 10.1105/tpc.108.059394. PubMed PMID: 18660430;

1375 PubMed Central PMCID: PMCPMC2518240.

1376 4. de Jonge R, van Esse HP, Kombrink A, Shinya T, Desaki Y, Bours R,

1377 et al. Conserved fungal LysM effector Ecp6 prevents chitin-triggered immunity

1378 in plants. *Science.* 2010;329(5994):953-35. Epub 2010/08/21. doi:

1379 329/5994/953 [pii]

1380 10.1126/science.1190859. PubMed PMID: 20724636.

1381 5. Doehlemann G, Reissmann S, Assmann D, Fleckenstein M, Kahmann

1382 R. Two linked genes encoding a secreted effector and a membrane protein

1383 are essential for *Ustilago maydis*-induced tumour formation. *Mol Microbiol.*

1384 2011;81(3):751-66. doi: 10.1111/j.1365-2958.2011.07728.x. PubMed PMID:

1385 21692877.

- 1386 6. Ma LS, Wang L, Trippel C, Mendoza-Mendoza A, Ullmann S, Moretti  
1387 M, et al. The *Ustilago maydis* repetitive effector Rsp3 blocks the antifungal  
1388 activity of mannose-binding maize proteins. Nature communications.  
1389 2018;9(1):1711. doi: 10.1038/s41467-018-04149-0. PubMed PMID:  
1390 29703884; PubMed Central PMCID: PMC5923269.
- 1391 7. Hurlburt NK, Chen L-H, Stergiopoulos I, Fisher AJ. Structure of the  
1392 *Cladosporium fulvum* Avr4 effector in complex with (GlcNAc)<sub>6</sub> reveals the  
1393 ligand-binding mechanism and uncouples its intrinsic function from recognition  
1394 by the Cf-4 resistance protein. PLoS Pathog. 2018;14(8):e1007263. Epub  
1395 2018/08/28. doi: 10.1371/journal.ppat.1007263. PubMed PMID: 30148881;  
1396 PubMed Central PMCID: PMCPMC6128652.
- 1397 8. Sánchez-Vallet A, Saleem-Batcha R, Kombrink A, Hansen G,  
1398 Valkenburg D-J, Thomma BPHJ, et al. Fungal effector Ecp6 outcompetes  
1399 host immune receptor for chitin binding through intrachain LysM dimerization.  
1400 Elife. 2013;2:e00790. Epub 2013/07/11. doi: 10.7554/eLife.00790. PubMed  
1401 PMID: 23840930; PubMed Central PMCID: PMCPMC3700227.
- 1402 9. Mueller AN, Ziemann S, Treitschke S, Assmann D, Doehlemann G.  
1403 Compatibility in the *Ustilago maydis*-maize interaction requires inhibition of  
1404 host cysteine proteases by the fungal effector Pit2. PLoS Pathog.  
1405 2013;9(2):e1003177. doi: 10.1371/journal.ppat.1003177. PubMed PMID:  
1406 23459172; PubMed Central PMCID: PMC3573112.
- 1407 10. Rooney HCE, Van't Klooster JW, van der Hoorn RAL, Joosten MHAJ,  
1408 Jones JDG, de Wit PJGM. *Cladosporium* Avr2 inhibits tomato Rcr3 protease  
1409 required for Cf-2-dependent disease resistance. Science.

- 1410 2005;308(5729):1783-6. Epub 2005/04/23. doi: 10.1126/science.1111404.
- 1411 PubMed PMID: 15845874.
- 1412 11. Shabab M, Shindo T, Gu C, Kaschani F, Pansuriya T, Chinthra R, et al.
- 1413 Fungal effector protein AVR2 targets diversifying defense-related cys
- 1414 proteases of tomato. *Plant Cell*. 2008;20(4):1169-83. Epub 2008/05/03. doi:
- 1415 10.1105/tpc.107.056325. PubMed PMID: 18451324; PubMed Central PMCID:
- 1416 PMCPMC2390736.
- 1417 12. Djamei A, Schipper K, Rabe F, Ghosh A, Vincon V, Kahnt J, et al.
- 1418 Metabolic priming by a secreted fungal effector. *Nature*. 2011;478(7369):395-
- 1419 8. Epub 2011/10/07. doi: nature10454 [pii]
- 1420 10.1038/nature10454. PubMed PMID: 21976020.
- 1421 13. O'Connell RJ, Panstruga R. Tête à tête inside a plant cell: establishing
- 1422 compatibility between plants and biotrophic fungi and oomycetes. *New Phytol*.
- 1423 2006;171(4):699-718. Epub 2006/08/22. doi: 10.1111/j.1469-
- 1424 8137.2006.01829.x. PubMed PMID: 16918543.
- 1425 14. Zamioudis C, Pieterse CMJ. Modulation of host immunity by beneficial
- 1426 microbes. *Mol Plant-Microbe Interact*. 2012;25(2):139-50. Epub 2011/10/15.
- 1427 doi: 10.1094/MPMI-06-11-0179. PubMed PMID: 21995763.
- 1428 15. Pauwels L, Goossens A. The JAZ proteins: a crucial interface in the
- 1429 jasmonate signaling cascade. *Plant Cell*. 2011;23(9):3089-100. Epub
- 1430 2011/10/04. doi: 10.1105/tpc.111.089300. PubMed PMID: 21963667; PubMed
- 1431 Central PMCID: PMCPMC3203442.
- 1432 16. Plett JM, Kemppainen M, Kale SD, Kohler A, Legue V, Brun A, et al. A
- 1433 secreted effector protein of *Laccaria bicolor* is required for symbiosis

- 1434 development. *Curr Biol.* 2011;21(14):1197-203. doi:  
1435 10.1016/j.cub.2011.05.033. PubMed PMID: 21757352.
- 1436 17. Plett JM, Daguerre Y, Wittulsky S, Vayssieres A, Deveau A, Melton SJ,  
1437 et al. Effector MiSSP7 of the mutualistic fungus *Laccaria bicolor* stabilizes the  
1438 Populus JAZ6 protein and represses jasmonic acid (JA) responsive genes.  
1439 *Proc Natl Acad Sci USA.* 2014;111(22):8299-304. doi:  
1440 10.1073/pnas.1322671111. PubMed PMID: 24847068; PubMed Central  
1441 PMCID: PMC4050555.
- 1442 18. Klop Holz S, Kuhn H, Requena N. A secreted fungal effector of  
1443 *Glomus intraradices* promotes symbiotic biotrophy. *Curr Biol.*  
1444 2011;21(14):1204-9. doi: 10.1016/j.cub.2011.06.044. PubMed PMID:  
1445 21757354.
- 1446 19. Wawra S, Fesel P, Widmer H, Timm M, Seibel J, Leson L, et al. The  
1447 fungal-specific beta-glucan-binding lectin FGB1 alters cell-wall composition  
1448 and suppresses glucan-triggered immunity in plants. *Nature communications.*  
1449 2016;7:13188. doi: 10.1038/ncomms13188. PubMed PMID: 27786272.
- 1450 20. Stergiopoulos I, de Wit PJGM. Fungal effector proteins. *Annu Rev*  
1451 *Phytopathol.* 2009;47:233-63. Epub 2009/04/30. doi:  
1452 10.1146/annurev.phyto.112408.132637. PubMed PMID: 19400631.
- 1453 21. Rouxel T, Grandaubert J, Hane JK, Hoede C, van de Wouw AP,  
1454 Couloux A, et al. Effector diversification within compartments of the  
1455 *Leptosphaeria maculans* genome affected by Repeat-Induced Point  
1456 mutations. *Nature communications.* 2011;2:202. doi: 10.1038/ncomms1189.  
1457 PubMed PMID: 21326234; PubMed Central PMCID: PMC3105345.

- 1458 22. Raffaele S, Kamoun S. Genome evolution in filamentous plant  
1459 pathogens: why bigger can be better. *Nat Rev Microbiol.* 2012;10(6):417-30.  
1460 Epub 2012/05/09. doi: 10.1038/nrmicro2790. PubMed PMID: 22565130.
- 1461 23. Feschotte C, Mouches C. Evidence that a family of miniature inverted-  
1462 repeat transposable elements (MITEs) from the *Arabidopsis thaliana* genome  
1463 has arisen from a pogo-like DNA transposon. *Mol Biol Evol.* 2000;17(5):730-7.  
1464 Epub 2000/04/26. doi: 10.1093/oxfordjournals.molbev.a026351. PubMed  
1465 PMID: 10779533.
- 1466 24. Fleetwood DJ, Khan AK, Johnson RD, Young CA, Mittal S, Wrenn RE,  
1467 et al. Abundant degenerate miniature inverted-repeat transposable elements  
1468 in genomes of epichloid fungal endophytes of grasses. *Genome Biol Evol.*  
1469 2011;3:1253-64. Epub 2011/09/29. doi: evr098 [pii]  
1470 10.1093/gbe/evr098. PubMed PMID: 21948396; PubMed Central PMCID:  
1471 PMC3227409.
- 1472 25. Schmidt SM, Houterman PM, Schreiver I, Ma L, Amyotte S, Chellappan  
1473 B, et al. MITEs in the promoters of effector genes allow prediction of novel  
1474 virulence genes in *Fusarium oxysporum*. *BMC Genomics.* 2013;14:119. doi:  
1475 10.1186/1471-2164-14-119. PubMed PMID: 23432788; PubMed Central  
1476 PMCID: PMC3599309.
- 1477 26. Winter DJ, Ganley ARD, Young CA, Liachko I, Schardl CL, Dupont PY,  
1478 et al. Repeat elements organise 3D genome structure and mediate  
1479 transcription in the filamentous fungus *Epichloë festucae*. *PLoS Genet.*  
1480 2018;14(10):e1007467. Epub 2018/10/26. doi:  
1481 10.1371/journal.pgen.1007467. PubMed PMID: 30356280.

- 1482 27. Fattash I, Rooke R, Wong A, Hui C, Luu T, Bhardwaj P, et al. Miniature  
1483 inverted-repeat transposable elements: discovery, distribution, and activity.  
1484 Genome. 2013;56(9):475-86. Epub 2013/10/31. doi: 10.1139/gen-2012-0174.  
1485 PubMed PMID: 24168668.
- 1486 28. Schardl CL, Scott B, Florea S, Zhang D. Epichloe endophytes:  
1487 clavicipitaceous symbionts of grasses. In: Deising HB, editor. The Mycota  
1488 Volume V - Plant Relationships. Berlin: Springer-Verlag; 2009. p. 275-306.
- 1489 29. Leuchtman A, Schardl CL, Siegel MR. Sexual compatibility and  
1490 taxonomy of a new species of *Epichloë* symbiotic with fine fescue grasses.  
1491 Mycologia. 1994;86:802-12.
- 1492 30. Schardl CL, Leuchtman A, Tsai H-F, Collett MA, Watt DM, Scott DB.  
1493 Origin of a fungal symbiont of perennial ryegrass by interspecific hybridization  
1494 of a mutualist with the ryegrass choke pathogen, *Epichloë typhina*. Genetics.  
1495 1994;136:1307-17.
- 1496 31. Chung K-R, Schardl CL. Sexual cycle and horizontal transmission of  
1497 the grass symbiont, *Epichloë typhina*. Mycol Res. 1997;101(3):295-301.
- 1498 32. Scott B, Schardl C. Fungal symbionts of grasses: evolutionary insights  
1499 and agricultural potential. Trends Microbiol. 1993;1(5):196-200.
- 1500 33. Chung K-R, Hollin W, Siegel MR, Schardl CL. Genetics of host  
1501 specificity in *Epichloë typhina*. Phytopathology. 1997;87(6):599-605.
- 1502 34. Tanaka A, Christensen MJ, Takemoto D, Park P, Scott B. Reactive  
1503 oxygen species play a role in regulating a fungus-perennial ryegrass  
1504 mutualistic association. Plant Cell. 2006;18:1052-66.
- 1505 35. Takemoto D, Kamakura S, Saikia S, Becker Y, Wrenn R, Tanaka A, et  
1506 al. Polarity proteins Bem1 and Cdc24 are components of the filamentous

- 1507 fungal NADPH oxidase complex. Proc Natl Acad Sci USA. 2011;108(7):2861-  
1508 6.
- 1509 36. Eaton CJ, Cox MP, Ambrose B, Becker M, Hesse U, Schardl CL, et al.  
1510 Disruption of signaling in a fungal-grass symbiosis leads to pathogenesis.  
1511 Plant Physiol. 2010;153(4):1780-94. Epub 2010/06/04. doi: pp.110.158451  
1512 [pii]  
1513 10.1104/pp.110.158451. PubMed PMID: 20519633.
- 1514 37. Takemoto D, Tanaka A, Scott B. A p67(Phox)-like regulator is recruited  
1515 to control hyphal branching in a fungal-grass mutualistic symbiosis. Plant Cell.  
1516 2006;18(10):2807-21. PubMed PMID: 17041146.
- 1517 38. Tanaka A, Takemoto D, Hyon GS, Park P, Scott B. NoxA activation by  
1518 the small GTPase RacA is required to maintain a mutualistic symbiotic  
1519 association between *Epichloë festucae* and perennial ryegrass. Mol Microbiol.  
1520 2008;68(5):1165-78. PubMed PMID: 18399936.
- 1521 39. Tanaka A, Cartwright GM, Saikia S, Kayano Y, Takemoto D, Kato M, et  
1522 al. ProA, a transcriptional regulator of fungal fruiting body development,  
1523 regulates leaf hyphal network development in the *Epichloë festucae-Lolium*  
1524 *perenne* symbiosis. Mol Microbiol. 2013;90(3):551-68. doi: doi:  
1525 10.1111/mmi.12385.
- 1526 40. Becker Y, Eaton CJ, Brasell E, May KJ, Becker M, Hassing B, et al.  
1527 The fungal cell wall integrity MAPK cascade is crucial for hyphal network  
1528 formation and maintenance of restrictive growth of *Epichloë festucae* in  
1529 symbiosis with *Lolium perenne*. Mol Plant-Microbe Interact. 2015;28:69-85.  
1530 doi: doi:10.1094/MPMI-06-14-0183-R.

- 1531 41. Sperschneider J, Gardiner DM, Dodds PN, Tini F, Covarelli L, Singh  
1532 KB, et al. EffectorP: predicting fungal effector proteins from secretomes using  
1533 machine learning. *New Phytol.* 2016;210(2):743-61. doi: 10.1111/nph.13794.  
1534 PubMed PMID: 26680733.
- 1535 42. Rittenour WR, Harris SD. Glycosylphosphatidylinositol-anchored  
1536 proteins in *Fusarium graminearum*: inventory, variability, and virulence. *PLoS*  
1537 *One.* 2013;8(11):e81603. doi: 10.1371/journal.pone.0081603. PubMed PMID:  
1538 24312325; PubMed Central PMCID: PMC3843709.
- 1539 43. Zhu W, Wei W, Wu Y, Zhou Y, Peng F, Zhang S, et al. BcCFEM1, a  
1540 CFEM domain-containing protein with putative GPI-anchored site, is involved  
1541 in pathogenicity, conidial production, and stress tolerance in *Botrytis cinerea*.  
1542 *Frontiers in microbiology.* 2017;8:1807. Epub 2017/10/06. doi:  
1543 10.3389/fmicb.2017.01807. PubMed PMID: 28979251; PubMed Central  
1544 PMCID: PMC5611420.
- 1545 44. Petersen TN, Brunak S, von Heijne G, Nielsen H. SignalP 4.0:  
1546 discriminating signal peptides from transmembrane regions. *Nat Methods.*  
1547 2011;8(10):785-6. Epub 2011/10/01. doi: nmeth.1701 [pii]  
1548 10.1038/nmeth.1701. PubMed PMID: 21959131.
- 1549 45. R development core team. R: A language and environment for  
1550 statistical computing. R Foundation for Statistical Computing, Vienna, Austria.  
1551 2013;URL <https://www.R-project.org/>.
- 1552 46. Quinlan AR. BEDTools: The swiss-army tool for genome feature  
1553 analysis. *Curr Protoc Bioinformatics.* 2014;47:11.2. 1-34. Epub 2014/09/10.  
1554 doi: 10.1002/0471250953.bi1112s47. PubMed PMID: 25199790; PubMed  
1555 Central PMCID: PMC4213956.



- 1556 47. Eaton CJ, Dupont P-Y, Solomon PS, Clayton W, Scott B, Cox MP. A  
1557 core gene set describes the molecular basis of mutualism and antagonism in  
1558 *Epichloë* species. Mol Plant-Microbe Interact. 2015;28:218-31. doi:  
1559 doi.org/10.1094/MPMI-09-14-0293-FI.
- 1560 48. Lachner M, O'Carroll D, Rea S, Mechtler K, Jenuwein T. Methylation of  
1561 histone H3 lysine 9 creates a binding site for HP1 proteins. Nature.  
1562 2001;410(6824):116-20. doi: 10.1038/35065132. PubMed PMID: 11242053.
- 1563 49. Maison C, Almouzni G. HP1 and the dynamics of heterochromatin  
1564 maintenance. Nat Rev Mol Cell Biol. 2004;5(4):296-304. doi:  
1565 10.1038/nrm1355. PubMed PMID: 15071554.
- 1566 50. Miller JH. Experiments in Molecular Genetics. New York: Cold Spring  
1567 Harbor Laboratory Press; 1972.
- 1568 51. Sambrook J, Fritsch EF, Maniatis T. Molecular cloning: a laboratory  
1569 manual. Cold Spring Harbor, New York: Cold Spring Harbor Laboratory Press;  
1570 1989.
- 1571 52. Jacobs KA, Collins-Racie LA, Colbert M, Duckett M, Golden-Fleet M,  
1572 Kelleher K, et al. A genetic selection for isolating cDNAs encoding secreted  
1573 proteins. Gene. 1997;198(1-2):289-96. PubMed PMID: 9370294.
- 1574 53. Ausubel FM, Brent R, Kingston RE, Moore DD, Seidman JG, Smith JA,  
1575 et al. Current Protocols in Molecular Biology. New York.: John Wiley & Sons;  
1576 1993.
- 1577 54. Moon CD, Tapper BA, Scott B. Identification of *Epichloë* endophytes *in*  
1578 *planta* by a microsatellite-based PCR fingerprinting assay with automated  
1579 analysis. Appl Environ Microbiol. 1999;65:1268-79.

- 1580 55. Moon CD, Scott B, Schardl CL, Christensen MJ. The evolutionary  
1581 origins of *Epichloë* endophytes from annual ryegrasses. *Mycologia*.  
1582 2000;92:1103-18.
- 1583 56. Latch GCM, Christensen MJ. Artificial infection of grasses with  
1584 endophytes. *Ann Appl Biol*. 1985;107(1):17-24.
- 1585 57. Byrd AD, Schardl CL, Songlin PJ, Mogen KL, Siegel MR. The  $\beta$ -tubulin  
1586 gene of *Epichloë typhina* from perennial ryegrass (*Lolium perenne*). *Curr*  
1587 *Genet*. 1990;18(4):347-54.
- 1588 58. Gibson DG, Young L, Chuang RY, Venter JC, Hutchison CA, III, Smith  
1589 HO. Enzymatic assembly of DNA molecules up to several hundred kilobases.  
1590 *Nat Methods*. 2009;6(5):343-5. Epub 2009/04/14. doi: nmeth.1318 [pii]  
1591 10.1038/nmeth.1318. PubMed PMID: 19363495.
- 1592 59. Eisenhaber B, Schneider G, Wildpaner M, Eisenhaber F. A sensitive  
1593 predictor for potential GPI lipid modification sites in fungal protein sequences  
1594 and its application to genome-wide studies for *Aspergillus nidulans*, *Candida*  
1595 *albicans*, *Neurospora crassa*, *Saccharomyces cerevisiae* and  
1596 *Schizosaccharomyces pombe*. *J Mol Biol*. 2004;337(2):243-53. doi:  
1597 10.1016/j.jmb.2004.01.025. PubMed PMID: 15003443.
- 1598 60. Khang CH, Berruyer R, Giraldo MC, Kankanala P, Park SY, Czymmek  
1599 K, et al. Translocation of *Magnaporthe oryzae* effectors into rice cells and their  
1600 subsequent cell-to-cell movement. *Plant Cell*. 2010;22(4):1388-403. Epub  
1601 2010/05/04. doi: tpc.109.069666 [pii]  
1602 10.1105/tpc.109.069666. PubMed PMID: 20435900; PubMed Central PMCID:  
1603 PMC2879738.

- 1604 61. Winston F, Dollard C, Ricupero-Hovasse SL. Construction of a set of  
1605 convenient *Saccharomyces cerevisiae* strains that are isogenic to S288C.  
1606 Yeast. 1995;11(1):53-5. Epub 1995/01/01. doi: 10.1002/yea.320110107.  
1607 PubMed PMID: 7762301.
- 1608 62. Gietz RD, Woods RA. Transformation of yeast by lithium  
1609 acetate/single-stranded carrier DNA/polyethylene glycol method. Meth  
1610 Enzymol. 2002;350:87-96. Epub 2002/06/21. PubMed PMID: 12073338.
- 1611 63. Koncz C, Martini N, Szabados L, Hroudá M, Bachmair A, Schell J.  
1612 Specialized vectors for gene tagging and expression studies. In: Gelvin SB,  
1613 Schilperoort RA, editors. Plant Molecular Biology Manual. Dordrecht: Kluwer  
1614 Academic; 1994. p. 1-22.
- 1615 64. Weigel D, Glazebrook J. Transformation of *Agrobacterium* using the  
1616 freeze-thaw method. CSH Protoc. 2006;pdb.prot4666.
- 1617 65. Young CA, Bryant MK, Christensen MJ, Tapper BA, Bryan GT, Scott B.  
1618 Molecular cloning and genetic analysis of a symbiosis-expressed gene cluster  
1619 for lolitrem biosynthesis from a mutualistic endophyte of perennial ryegrass.  
1620 Mol Gen Genomics. 2005;274:13-29.
- 1621 66. Itoh Y, Johnson R, Scott B. Integrative transformation of the mycotoxin-  
1622 producing fungus, *Penicillium paxilli*. Curr Genet. 1994;25:508-13.
- 1623 67. Lukito Y, Chujo T, Scott B. Molecular and cellular analysis of the pH  
1624 response transcription factor PacC in the fungal symbiont *Epichloë festucae*.  
1625 Fungal Genet Biol. 2015;85:25-37. doi: 10.1016/j.fgb.2015.10.008. PubMed  
1626 PMID: 26529380.
- 1627 68. Chujo T, Scott B. Histone H3K9 and H3K27 methylation regulates  
1628 fungal alkaloid biosynthesis in a fungal endophyte-plant symbiosis. Mol

- 1629 Microbiol. 2014;92(2):413-34. Epub 2014/02/28. doi: 10.1111/mmi.12567.
- 1630 PubMed PMID: 24571357.
- 1631 69. Becker Y, Green K, Scott B, Becker M. Artificial inoculation of *Epichloë*  
1632 *festucae* into *Lolium perenne*, and visualization of endophytic and epiphyllous  
1633 fungal growth. Bio-protocol 2018;8:e2990.
- 1634 70. Florea S, Schardl CL, Hollin W. Detection and isolation of *Epichloë*  
1635 species, fungal endophytes of grasses. Current protocols in microbiology.  
1636 2015;38:19A.1.-A.1.24. Epub 2015/08/04. doi:  
1637 10.1002/9780471729259.mc19a01s38. PubMed PMID: 26237108.
- 1638 71. Spiers AG, Hopcroft DH. Black canker and leaf spot of *Salix* in New  
1639 Zealand caused by *Glomerella miyabeana* (*Colletotrichum gloeosporioides*).  
1640 Eur J Forest Pathol. 1993;23:92-102.
- 1641 72. Mesarich CH, Ökmen B, Rovenich H, Griffiths SA, Wang C, Karimi  
1642 Jashni M, et al. Specific hypersensitive response-associated recognition of  
1643 new apoplastic effectors from *Cladosporium fulvum* in wild tomato. Mol Plant-  
1644 Microbe Interact. 2018;31(1):145-62. doi: 10.1094/MPMI-05-17-0114-FI.  
1645 PubMed PMID: 29144204.
- 1646 73. Joosten MHAJ, Vogelsang R, Cozijnsen TJ, Verberne MC, de Wit  
1647 PJGM. The biotrophic fungus *Cladosporium fulvum* circumvents *Cf-4*-  
1648 mediated resistance by producing unstable AVR4 elicitors. Plant Cell.  
1649 1997;9(3):367-79.
- 1650 74. Luderer R, De Kock MJD, Dees RHL, De Wit PJGM, Joosten MHAJ.  
1651 Functional analysis of cysteine residues of ECP elicitor proteins of the fungal  
1652 tomato pathogen *Cladosporium fulvum*. Mol Plant Pathol. 2002;3(2):91-5.

- 1653 Epub 2002/03/01. doi: 10.1046/j.1464-6722.2001.00095.x. PubMed PMID:  
1654 20569313.
- 1655 75. Kämper J, Kahmann R, Bolker M, Ma LJ, Brefort T, Saville BJ, et al.  
1656 Insights from the genome of the biotrophic fungal plant pathogen *Ustilago*  
1657 *maydis*. Nature. 2006;444(7115):97-101. doi: 10.1038/nature05248. PubMed  
1658 PMID: 17080091.
- 1659 76. Brefort T, Tanaka S, Neidig N, Doehlemann G, Vincon V, Kahmann R.  
1660 Characterization of the largest effector gene cluster of *Ustilago maydis*. PLoS  
1661 Pathog. 2014;10(7):e1003866. doi: 10.1371/journal.ppat.1003866. PubMed  
1662 PMID: 24992561; PubMed Central PMCID: PMC4081774.
- 1663 77. Cambareri EB, Jensen BC, Schabtach E, Selker EU. Repeat-induced  
1664 G-C to A-T mutations in *Neurospora*. Science. 1989;244(4912):1571-5.  
1665 PubMed PMID: 2544994.
- 1666 78. Gladyshev E. Repeat-induced point mutation and other genome  
1667 defense mechanisms in fungi. Microbiol Spectrum. 2017;5(4):FUNK-0042-  
1668 2017. doi: 10.1128/microbiolspec.FUNK-0042-2017. PubMed PMID:  
1669 28721856; PubMed Central PMCID: PMC5607778.
- 1670 79. Cambareri EB, Singer MJ, Selker EU. Recurrence of repeat-induced  
1671 point mutation (RIP) in *Neurospora crassa*. Genetics. 1991;127(4):699-710.  
1672 Epub 1991/04/01. PubMed PMID: 1827629; PubMed Central PMCID:  
1673 PMC1204397.
- 1674 80. Fudal I, Ross S, Brun H, Besnard AL, Ermel M, Kuhn ML, et al.  
1675 Repeat-induced point mutation (RIP) as an alternative mechanism of  
1676 evolution toward virulence in *Leptosphaeria maculans*. Mol Plant-Microbe

- 1677 Interact. 2009;22(8):932-41. Epub 2009/07/11. doi: 10.1094/MPMI-22-8-0932.
- 1678 PubMed PMID: 19589069.
- 1679 81. Wong S, Wolfe KH. Birth of a metabolic gene cluster in yeast by  
1680 adaptive gene relocation. Nature Genetics. 2005;37(7):777-82. PubMed  
1681 PMID: 15951822.
- 1682 82. Orbach MJ, Farrall L, Sweigard JA, Chumley FG, Valent B. A telomeric  
1683 avirulence gene determines efficacy for the rice blast resistance gene *Pi-ta*.  
1684 Plant Cell. 2000;12(11):2019-32.
- 1685 83. Rehmeyer C, Li W, Kusaba M, Kim YS, Brown D, Staben C, et al.  
1686 Organization of chromosome ends in the rice blast fungus, *Magnaporthe*  
1687 *oryzae*. Nucleic Acids Res. 2006;34(17):4685-701. PubMed PMID: 16963777.
- 1688 84. Brown CA, Murray AW, Verstrepen KJ. Rapid expansion and functional  
1689 divergence of subtelomeric gene families in yeasts. Curr Biol.  
1690 2010;20(10):895-903. Epub 2010/05/18. doi: 10.1016/j.cub.2010.04.027.  
1691 PubMed PMID: 20471265; PubMed Central PMCID: PMC2877759.
- 1692 85. Hirsch CD, Springer NM. Transposable element influences on gene  
1693 expression in plants. Biochim Biophys Acta Gene Regul Mech.  
1694 2017;1860(1):157-65. Epub 2016/05/29. doi: 10.1016/j.bbagr.2016.05.010.  
1695 PubMed PMID: 27235540.
- 1696 86. Chuong EB, Elde NC, Feschotte C. Regulatory activities of  
1697 transposable elements: from conflicts to benefits. Nat Rev Genet.  
1698 2016;18(2):71-86. doi: 10.1038/nrg.2016.139. PubMed PMID: 27867194.
- 1699 87. Lanver D, Müller AN, Happel P, Schweizer G, Haas FB, Franitza M, et  
1700 al. The biotrophic development of *Ustilago maydis* studied by RNA-Seq

- 1701 analysis. *Plant Cell*. 2018;30(2):300-23. doi: 10.1105/tpc.17.00764. PubMed  
1702 PMID: 29371439; PubMed Central PMCID: PMC5868686.
- 1703 88. Kleemann J, Rincon-Rivera LJ, Takahara H, Neumann U, Ver Loren  
1704 van Themaat E, van der Does HC, et al. Sequential delivery of host-induced  
1705 virulence effectors by appressoria and intracellular hyphae of the  
1706 phytopathogen *Colletotrichum higginsianum*. *PLoS Pathog*.  
1707 2012;8(4):e1002643. Epub 2012/04/13. doi: 10.1371/journal.ppat.1002643.  
1708 PubMed PMID: 22496661; PubMed Central PMCID: PMCPMC3320591.
- 1709 89. Soyer JL, El Ghalid M, Glaser N, Ollivier B, Linglin J, Grandaubert J, et  
1710 al. Epigenetic control of effector gene expression in the plant pathogenic  
1711 fungus *Leptosphaeria maculans*. *PLoS Genet*. 2013;10(3):e1004227. Epub  
1712 2014/03/08. doi: 10.1371/journal.pgen.1004227  
1713 PGENETICS-D-13-03255 [pii]. PubMed PMID: 24603691; PubMed Central  
1714 PMCID: PMC3945186.
- 1715 90. Jones P, Binns D, Chang HY, Fraser M, Li W, McAnulla C, et al.  
1716 InterProScan 5: genome-scale protein function classification. *Bioinformatics*.  
1717 2014;30(9):1236-40. Epub 2014/01/24. doi: 10.1093/bioinformatics/btu031.  
1718 PubMed PMID: 24451626; PubMed Central PMCID: PMC3998142.
- 1719 91. Letunic I, Doerks T, Bork P. SMART: recent updates, new  
1720 developments and status in 2015. *Nucleic Acids Res*. 2015;43(Database  
1721 issue):D257-60. Epub 2014/10/11. doi: 10.1093/nar/gku949. PubMed PMID:  
1722 25300481; PubMed Central PMCID: PMC4384020.
- 1723 92. Jorda J, Kajava AV. T-REKS: identification of Tandem REpeats in  
1724 sequences with a K-meanS based algorithm. *Bioinformatics*.

- 1725 2009;25(20):2632-8. Epub 2009/08/13. doi: 10.1093/bioinformatics/btp482.
- 1726 PubMed PMID: 19671691.
- 1727 93. Zimmermann L, Stephens A, Nam SZ, Rau D, Kubler J, Lozajic M, et  
1728 al. A completely reimplemented MPI bioinformatics toolkit with a new HHpred  
1729 server at its core. J Mol Biol. 2018;430(15):2237-43. Epub 2017/12/21. doi:  
1730 10.1016/j.jmb.2017.12.007. PubMed PMID: 29258817.
- 1731 94. Schardl CL, Young CA, Hesse U, Amyotte SG, Andreeva K, Calie PJ,  
1732 et al. Plant-symbiotic fungi as chemical engineers: multi-genome analysis of  
1733 the Clavicipitaceae reveals dynamics of alkaloid loci. PLoS Genetics.  
1734 2013;9(2):e1003323.
- 1735 95. Kettles GJ, Bayon C, Canning G, Rudd JJ, Kanyuka K. Apoplastic  
1736 recognition of multiple candidate effectors from the wheat pathogen  
1737 *Zymoseptoria tritici* in the nonhost plant *Nicotiana benthamiana*. New Phytol.  
1738 2017;213(1):338-50. Epub 2016/10/04. doi: 10.1111/nph.14215. PubMed  
1739 PMID: 27696417; PubMed Central PMCID: PMC5132004.
- 1740 96. Bos JIB, Kanneganti T-D, Young C, Cakir C, Huitema E, Win J, et al.  
1741 The C-terminal half of *Phytophthora infestans* RXLR effector AVR3a is  
1742 sufficient to trigger R3a-mediated hypersensitivity and suppress INF1-induced  
1743 cell death in *Nicotiana benthamiana*. Plant J. 2006;48(2):165-76. Epub  
1744 2006/09/13. doi: 10.1111/j.1365-313X.2006.02866.x. PubMed PMID:  
1745 16965554.
- 1746 97. Ma LJ, van der Does HC, Borkovich KA, Coleman JJ, Daboussi MJ, Di  
1747 Pietro A, et al. Comparative genomics reveals mobile pathogenicity  
1748 chromosomes in *Fusarium*. Nature. 2010;464(7287):367-73. Epub  
1749 2010/03/20. doi: nature08850 [pii]



- 1750 10.1038/nature08850. PubMed PMID: 20237561.
- 1751 98. van Dam P, Fokkens L, Schmidt SM, Linmans JH, Kistler HC, Ma LJ,  
1752 et al. Effector profiles distinguish formae speciales of *Fusarium oxysporum*.  
1753 Environ Microbiol. 2016;18(11):4087-102. doi: 10.1111/1462-2920.13445.  
1754 PubMed PMID: 27387256.
- 1755 99. Inoue Y, Vy TTP, Yoshida K, Asano H, Mitsuoka C, Asuke S, et al.  
1756 Evolution of the wheat blast fungus through functional losses in a host  
1757 specificity determinant. Science. 2017;357(6346):80-3. Epub 2017/07/08. doi:  
1758 10.1126/science.aam9654. PubMed PMID: 28684523.
- 1759 100. Yoshida K, Saitoh H, Fujisawa S, Kanzaki H, Matsumura H, Yoshida K,  
1760 et al. Association genetics reveals three novel avirulence genes from the rice  
1761 blast fungal pathogen *Magnaporthe oryzae*. Plant Cell. 2009;21(5):1573-91.  
1762 Epub 2009/05/21. doi: 10.1105/tpc.109.066324. PubMed PMID: 19454732;  
1763 PubMed Central PMCID: PMC2700537.
- 1764 101. Ridout CJ, Skamnioti P, Porritt O, Sacristan S, Jones JD, Brown JK.  
1765 Multiple avirulence paralogues in cereal powdery mildew fungi may contribute  
1766 to parasite fitness and defeat of plant resistance. Plant Cell. 2006;18(9):2402-  
1767 14. doi: 10.1105/tpc.106.043307. PubMed PMID: 16905653; PubMed Central  
1768 PMCID: PMC1560912.
- 1769 102. Houterman PM, Cornelissen BJ, Rep M. Suppression of plant  
1770 resistance gene-based immunity by a fungal effector. PLoS Pathog.  
1771 2008;4(5):e1000061. Epub 2008/05/10. doi: 10.1371/journal.ppat.1000061.  
1772 PubMed PMID: 18464895; PubMed Central PMCID: PMC2330162.
- 1773 103. Selin C, de Kievit TR, Belmonte MF, Fernando WG. Elucidating the  
1774 role of effectors in plant-fungal interactions: progress and challenges.

- 1775 Frontiers in microbiology. 2016;7:600. Epub 2016/05/21. doi:  
1776 10.3389/fmicb.2016.00600. PubMed PMID: 27199930; PubMed Central  
1777 PMCID: PMC4846801.
- 1778 104. Lu C, Chen J, Zhang Y, Hu Q, Su W, Kuang H. Miniature inverted-  
1779 repeat transposable elements (MITEs) have been accumulated through  
1780 amplification bursts and play important roles in gene expression and species  
1781 diversity in *Oryza sativa*. Mol Biol Evol. 2012;29(3):1005-17. Epub  
1782 2011/11/19. doi: 10.1093/molbev/msr282. PubMed PMID: 22096216; PubMed  
1783 Central PMCID: PMC3278479.
- 1784 105. Fleetwood DJ, Scott B, Lane GA, Tanaka A, Johnson RD. A complex  
1785 ergovaline gene cluster in epichloë endophytes of grasses. Appl Environ  
1786 Microbiol. 2007;73(8):2571-9. PubMed PMID: 17308187.
- 1787 106. van Dam P, Fokkens L, Ayukawa Y, van der Gragt M, Ter Horst A,  
1788 Brankovics B, et al. A mobile pathogenicity chromosome in *Fusarium*  
1789 *oxysporum* for infection of multiple cucurbit species. Sci Rep. 2017;7(1):9042.  
1790 Epub 2017/08/24. doi: 10.1038/s41598-017-07995-y. PubMed PMID:  
1791 28831051; PubMed Central PMCID: PMC5567276.
- 1792 107. Bolton MD, van Esse HP, Vossen JH, de Jonge R, Stergiopoulos I,  
1793 Stulemeijer IJE, et al. The novel *Cladosporium fulvum* lysin motif effector  
1794 Ecp6 is a virulence factor with orthologues in other fungal species. Mol  
1795 Microbiol. 2008;69(1):119-36. Epub 2008/05/03. doi: 10.1111/j.1365-  
1796 2958.2008.06270.x. PubMed PMID: 18452583.
- 1797 108. Vargas WA, Sanz-Martín JM, Rech GE, Armijos-Jaramillo VD, Rivera  
1798 LP, Echeverria MM, et al. A fungal effector with host nuclear localization and  
1799 DNA-binding properties is required for maize anthracnose development. Mol

1800 Plant-Microbe Interact. 2016;29(2):83-95. Epub 2015/11/12. doi:  
1801 10.1094/MPMI-09-15-0209-R. PubMed PMID: 26554735.  
1802 109. Mesarich CH, Bowen JK, Hamiaux C, Templeton MD. Repeat-  
1803 containing protein effectors of plant-associated organisms. Front Plant Sci.  
1804 2015;6:872. Epub 2015/11/12. doi: 10.3389/fpls.2015.00872. PubMed PMID:  
1805 26557126; PubMed Central PMCID: PMC4617103.  
1806 110. Grove TZ, Cortajarena AL, Regan L. Ligand binding by repeat proteins:  
1807 natural and designed. Curr Opin Struct Biol. 2008;18(4):507-15. Epub  
1808 2008/07/08. doi: 10.1016/j.sbi.2008.05.008. PubMed PMID: 18602006;  
1809 PubMed Central PMCID: PMC4617103.  
1810 111. Johnson RD, Lane GA, Koulman A, Cao M, Fraser K, Fleetwood DJ, et  
1811 al. A novel family of cyclic oligopeptides derived from ribosomal peptide  
1812 synthesis of an in planta-induced gene, *gigA*, in *Epichloë* endophytes of  
1813 grasses. Fungal Genet Biol. 2015;85:14-24. doi: 10.1016/j.fgb.2015.10.005.  
1814 PubMed PMID: 26519220.  
1815 112. Wosten HA, Bohlmann R, Eckerskorn C, Lottspeich F, Bolker M,  
1816 Kahmann R. A novel class of small amphipathic peptides affect aerial hyphal  
1817 growth and surface hydrophobicity in *Ustilago maydis*. EMBO J.  
1818 1996;15(16):4274-81. Epub 1996/08/15. PubMed PMID: 8861956; PubMed  
1819 Central PMCID: PMC452153.  
1820 113. Teertstra WR, van der Velden GJ, de Jong JF, Kruijtz JA, Liskamp  
1821 RM, Kroon-Batenburg LM, et al. The filament-specific Rep1-1 repellent of the  
1822 phytopathogen *Ustilago maydis* forms functional surface-active amyloid-like  
1823 fibrils. J Biol Chem. 2009;284(14):9153-9. Epub 2009/01/24. doi:

- 1824 10.1074/jbc.M900095200. PubMed PMID: 19164282; PubMed Central  
1825 PMCID: PMCPMC2666566.
- 1826 114. Christensen MJ, Bennett RJ, Ansari HA, Koga H, Johnson RD, Bryan  
1827 GT, et al. *Epichloë* endophytes grow by intercalary hyphal extension in  
1828 elongating grass leaves. *Fungal Genet Biol.* 2008;45:84-93.
- 1829 115. Voisey CR. Intercalary growth in hyphae of filamentous fungi. *Fungal*  
1830 *Biol Rev.* 2010;24:123-31.
- 1831 116. Bultman TL, Leuchtmann A. Biology of the *Epichloë-Botanophila*  
1832 interaction: an intriguing association between fungi and insects. *Fungal Biol*  
1833 *Rev.* 2009;22:131-8.
- 1834 117. Stewart EL, McDonald BA. Measuring quantitative virulence in the  
1835 wheat pathogen *Zymoseptoria tritici* using high-throughput automated image  
1836 analysis. *Phytopathology.* 2014;104(9):985-92. Epub 2014/03/15. doi:  
1837 10.1094/PHYTO-11-13-0328-R. PubMed PMID: 24624955.
- 1838 118. Stewart EL, Hagerty CH, Mikaberidze A, Mundt CC, Zhong Z,  
1839 McDonald BA. An improved method for measuring quantitative resistance to  
1840 the wheat pathogen *Zymoseptoria tritici* using high-throughput automated  
1841 image analysis. *Phytopathology.* 2016;106(7):782-8. Epub 2016/04/07. doi:  
1842 10.1094/PHYTO-01-16-0018-R. PubMed PMID: 27050574.
- 1843 119. Wessling R, Epple P, Altmann S, He Y, Yang L, Henz SR, et al.  
1844 Convergent targeting of a common host protein-network by pathogen  
1845 effectors from three kingdoms of life. *Cell host & microbe.* 2014;16(3):364-75.  
1846 Epub 2014/09/12. doi: 10.1016/j.chom.2014.08.004. PubMed PMID:  
1847 25211078; PubMed Central PMCID: PMC4191710.

- 1848 120. Win J, Chaparro-Garcia A, Belhaj K, Saunders DG, Yoshida K, Dong  
1849 S, et al. Effector biology of plant-associated organisms: concepts and  
1850 perspectives. Cold Spring Harbor symposia on quantitative biology.  
1851 2012;77:235-47. Epub 2012/12/12. doi: 10.1101/sqb.2012.77.015933.  
1852 PubMed PMID: 23223409.
- 1853 121. Heath MC. Nonhost resistance and nonspecific plant defenses. Curr  
1854 Opin Plant Biol. 2000;3(4):315-9. PubMed PMID: 10873843.
- 1855 122. Derevnina L, Dagdas YF, De la Concepcion JC, Bialas A, Kellner R,  
1856 Petre B, et al. Nine things to know about elicitors. New Phytol.  
1857 2016;212(4):888-95. Epub 2016/09/02. doi: 10.1111/nph.14137. PubMed  
1858 PMID: 27582271.
- 1859 123. Du J, Verzaux E, Chaparro-Garcia A, Bijsterbosch G, Keizer LC, Zhou  
1860 J, et al. Elicitor recognition confers enhanced resistance to *Phytophthora*  
1861 *infestans* in potato. Nature plants. 2015;1(4):15034. Epub 2015/01/01. doi:  
1862 10.1038/nplants.2015.34. PubMed PMID: 27247034.
- 1863 124. Dupont PY, Eaton CJ, Wargent JJ, Fechtner S, Solomon P, Schmid J,  
1864 et al. Fungal endophyte infection of ryegrass reprograms host metabolism and  
1865 alters development. New Phytol. 2015;208(4):1227-40. doi:  
1866 10.1111/nph.13614. PubMed PMID: 26305687.
- 1867 125. Becker M, Becker Y, Green K, Scott B. The endophytic symbiont  
1868 *Epichloë festucae* establishes an epiphyllous net on the surface of *Lolium*  
1869 *perenne* leaves by development of an expressorium, an appressorium-like  
1870 leaf exit structure. New Phytol. 2016;211:240-54. doi: 10.1111/nph.13931.  
1871 PubMed PMID: 26991322.
- 1872

1873

1874 **Supporting information**

1875

1876 **S1 File. Methods for computational analysis.**

1877

1878 **S1 Fig. Amino acid sequence alignments of *E. festucae* GpiB, SspM, SspN**  
1879 **and SspO.** Alignments of GpiB (A), SspM (B), SspN (C) and SspO (D) with  
1880 homologs from a selection of *Epichloë* species. Red shading: Protease  
1881 cleavage site; Green shading: omega site; Purple shading: *N*-glycosylation site;  
1882 Orange shading: cysteine residues. Protein sequences for *E. baconii*, *E. elymi*  
1883 and *E. typhina* were obtained from the Kentucky Endophyte database when  
1884 available or predicted using FGENESH using *Claviceps purpurea* parameters.  
1885 The deduced amino acid sequence was used for the alignment. Sequences  
1886 marked with \* were manually annotated.

1887

1888 **S2 Fig. Strategy for deletion of the *E. festucae* *gpiB*, *sspM*, *sspN* and *sspO***  
1889 **genes and confirmation by Southern analysis.** (A) Physical map of the *gpiB*  
1890 WT genomic locus, linear insert of the *gpiB* replacement construct, pBH1, and  
1891 the recombinant locus showing restriction enzyme sites for *Nde*I. Grey shading  
1892 indicates regions of recombination. Numbers indicate the PCR primer pairs  
1893 used for Gibson assembly (BH1/BH5) and deletion mutant screening  
1894 (BH43/BH44). (B) PCR screening of deletion candidates with the PCR primer  
1895 pair BH43/BH44, generated expected bands of 3,997 bp in WT, and 4,602 bp  
1896 in deletion mutants (C) NBT/BCIP-stained Southern blot of digests (approx. 1  
1897 µg) from *E. festucae* WT,  $\Delta gpiB$  T27,  $\Delta gpiB$  T111 (PN3113),  $\Delta gpiB$  T133  
1898 (PN3114),  $\Delta gpiB$  T148 (PN3115),  $\Delta gpiB$  T160 and  $\Delta gpiB$  T204 strains probed

1899 with digoxigenin (DIG)-11-dUTP-labeled linear insert of pBH1 amplified with the  
1900 primer pair BH1/BH5. Expected bands of 5,317 bp in WT, and 3,971 bp and  
1901 1,951 bp in the deletion mutant.

1902 (D) Physical map of the *sspM* WT genomic locus, linear insert of the *sspM*  
1903 replacement construct, pBH2, and the recombinant locus showing restriction  
1904 enzyme sites for *EcoRI*. Grey shading indicates regions of recombination.  
1905 Numbers indicate the PCR primer pairs used for Gibson assembly (BH9/BH12)  
1906 and deletion mutant screening (BH45/BH46). (E) PCR screening of deletion  
1907 candidates with the PCR primer pair BH45/BH46, generated expected bands  
1908 of 3,615 bp in WT, and 4,190 bp in deletion mutants. (F) NBT/BCIP-stained  
1909 Southern blot of digests (approx. 1  $\mu$ g) of *E. festucae* WT,  $\Delta$ *sspM* T180,  $\Delta$ *sspM*  
1910 T173,  $\Delta$ *sspM* T163 (PN3118),  $\Delta$ *sspM* T135,  $\Delta$ *sspM* T99 (PN3117) and  $\Delta$ *sspM*  
1911 T52 (PN3116) strains probed with digoxigenin (DIG)-11-dUTP-labeled linear  
1912 insert of pBH2 amplified with the primer pair BH9/BH12. Expected bands of  
1913 2,205 bp and 1,569 bp in WT and 4,349 bp in the deletion mutant.

1914 (G) Physical map of the *sspN* WT genomic locus, linear insert of the *sspN*  
1915 replacement construct, pBH3, and the recombinant locus showing restriction  
1916 enzyme sites for *Bam*HI. Grey shading indicates regions of recombination.  
1917 Numbers indicate the PCR primer pairs used for Gibson assembly  
1918 (BH13/BH16) and deletion mutant screening (BH47/BH48). (H and J) PCR  
1919 screening of deletion candidates with the PCR primer pair BH47/BH48,  
1920 generated expected band of 3,403 bp in WT, and 4,250 bp in deletion mutants.  
1921 (I) NBT/BCIP-stained Southern blot of digests (approx. 1  $\mu$ g) of *E. festucae* WT,  
1922  $\Delta$ *sspN* T151 and  $\Delta$ *sspN* T10 (PN3119), strains probed with digoxigenin (DIG)-  
1923 11-dUTP-labeled linear insert of pBH1 amplified with the primer pair



1924 BH13/BH16. (K) NBT/BCIP-stained Southern blot of digests (approx. 1 µg) of  
1925 *E. festucae* WT,  $\Delta sspN$  T52 (PN3121),  $\Delta sspN$  T15,  $\Delta sspN$  T103,  $\Delta sspN$  T51,  
1926  $\Delta sspN$  T30 (PN3120) and  $\Delta sspN$  T3 strains probed with digoxigenin (DIG)-11-  
1927 dUTP-labeled linear insert of pBH3 amplified with the primer pair BH13/BH16.  
1928 Expected bands of 1,710 bp and 3,631 bp in WT, and 1,710 bp and 4,477, in  
1929 the deletion mutant.

1930 (L) Physical map of the *sspO* WT genomic locus, linear insert of the *sspO*  
1931 replacement construct, pBH4, and the recombinant locus showing restriction  
1932 enzyme sites for *Pst*I. Grey shading indicates regions of recombination.  
1933 Numbers indicate the PCR primer pairs used for Gibson assembly (BH5/BH9)  
1934 and deletion mutant screening (BH49/BH50). (M) PCR screening of deletion  
1935 candidates with the PCR primer pair BH49/BH50, generated expected band of  
1936 3,654 bp in WT, and 4,482 bp in deletion mutants. (N) NBT/BCIP-stained  
1937 Southern blot of digests (approx. 1 µg) of *E. festucae* WT,  $\Delta sspO$  T210  
1938 (PN3124),  $\Delta sspO$  T195 (PN3123),  $\Delta sspO$  T130,  $\Delta sspO$  T102,  $\Delta sspO$  T78  
1939 (PN3122) and  $\Delta sspO$  T60 strains probed with digoxigenin (DIG)-11-dUTP-  
1940 labeled linear insert of pBH4 amplified with the primer pair BH5/BH9. Expected  
1941 bands of 1,859 bp and 1,678 bp in WT and 4,635 bp in the deletion mutant.

1942

1943 **S3 Fig. Confocal laser scanning microscopy of aniline blue and WGA-**  
1944 **AF488 stained ovaries.** The fungal endophytic cell wall was stained with  
1945 aniline blue (orange pseudo colour) while fungal septa were stained with WGA-  
1946 AF 488 (blue pseudo colour). A. Ovary of mutant strain  $\Delta sspM$  T52, B. Ovary  
1947 of mutant strain  $\Delta sspM$  T163. *E. festucae* hyphae are marked by asterisk. Scale  
1948 bar: 50 µm.

1949

1950

1951 **S4 Fig. qPCR and RT-qPCR results of the *gpiB*, *sspM*, *sspN* and *sspO***

1952 **OE strains.** (A) Copy number determined by qPCR is expressed relative to

1953 the WT copy number. Genes encoding *hepA* (single copy, light grey) and

1954 *pacC* (single copy, dark grey) were used as reference genes. (B) Expression

1955 level determined by RT-qPCR is expressed relative to the WT gene

1956 expression. The 40S ribosomal S22 gene was used as reference gene.

1957 Primers used for the analyses are given in S2 Table.

1958

1959 **S5 Fig. Verification of the heterologous production of GpiB, SspM, SspN**

1960 **and SspO in *N. benthamiana* via western blotting.** Total protein of the

1961 infiltrated leaf region was extracted and separated by electrophoresis on a 10%

1962 SDS gel. The gel was transferred to a membrane and probed with an anti-FLAG

1963 antibody. eGFP expressed in *N. benthamiana* served as positive control.

1964 Expected sizes: approx. 9.8 kDa for GpiB, 14 kDa for SspN, 10 kDa for SspO

1965 and for SspM 14.8 and 18.8 kDa.

1966

1967 **S1 Table. Biosample references**

1968

1969 **S2 Table. Biological material.**

1970

1971 **S3 Table. Primers used in this study.**

1972

- 1973 **S4 Table. Summary of the presented information about *E. festucae***
- 1974 **effector candidates.**
- 1975
- 1976 **S5 Table. Distribution of *gpiB* and the *ssps* within *Epichloë* and related**
- 1977 **species.**
- 1978
- 1979 **S6 Table. Vertical transmission of *ssp* mutants in *L. perenne*.**
- 1980
- 1981

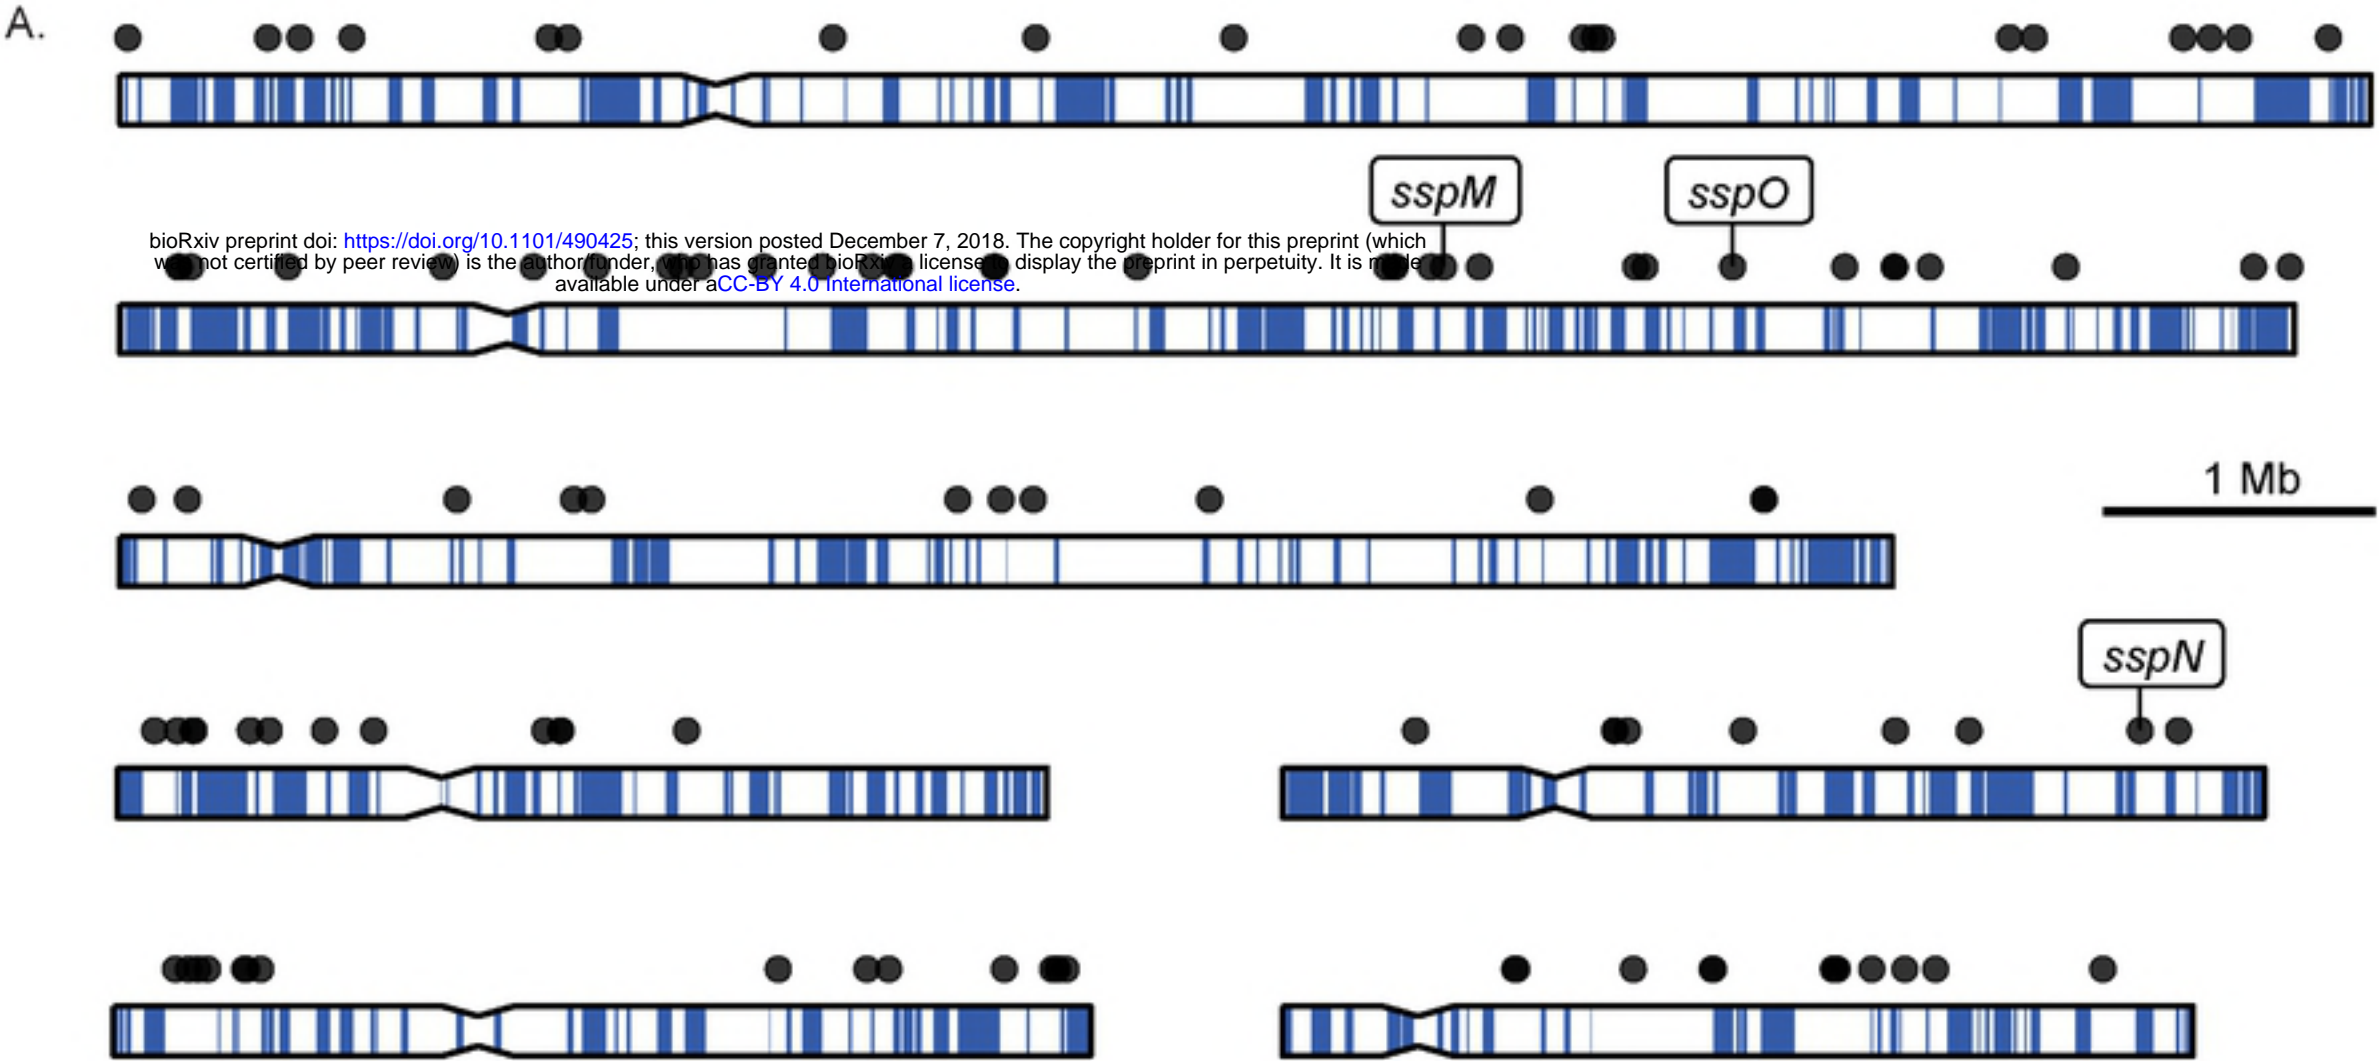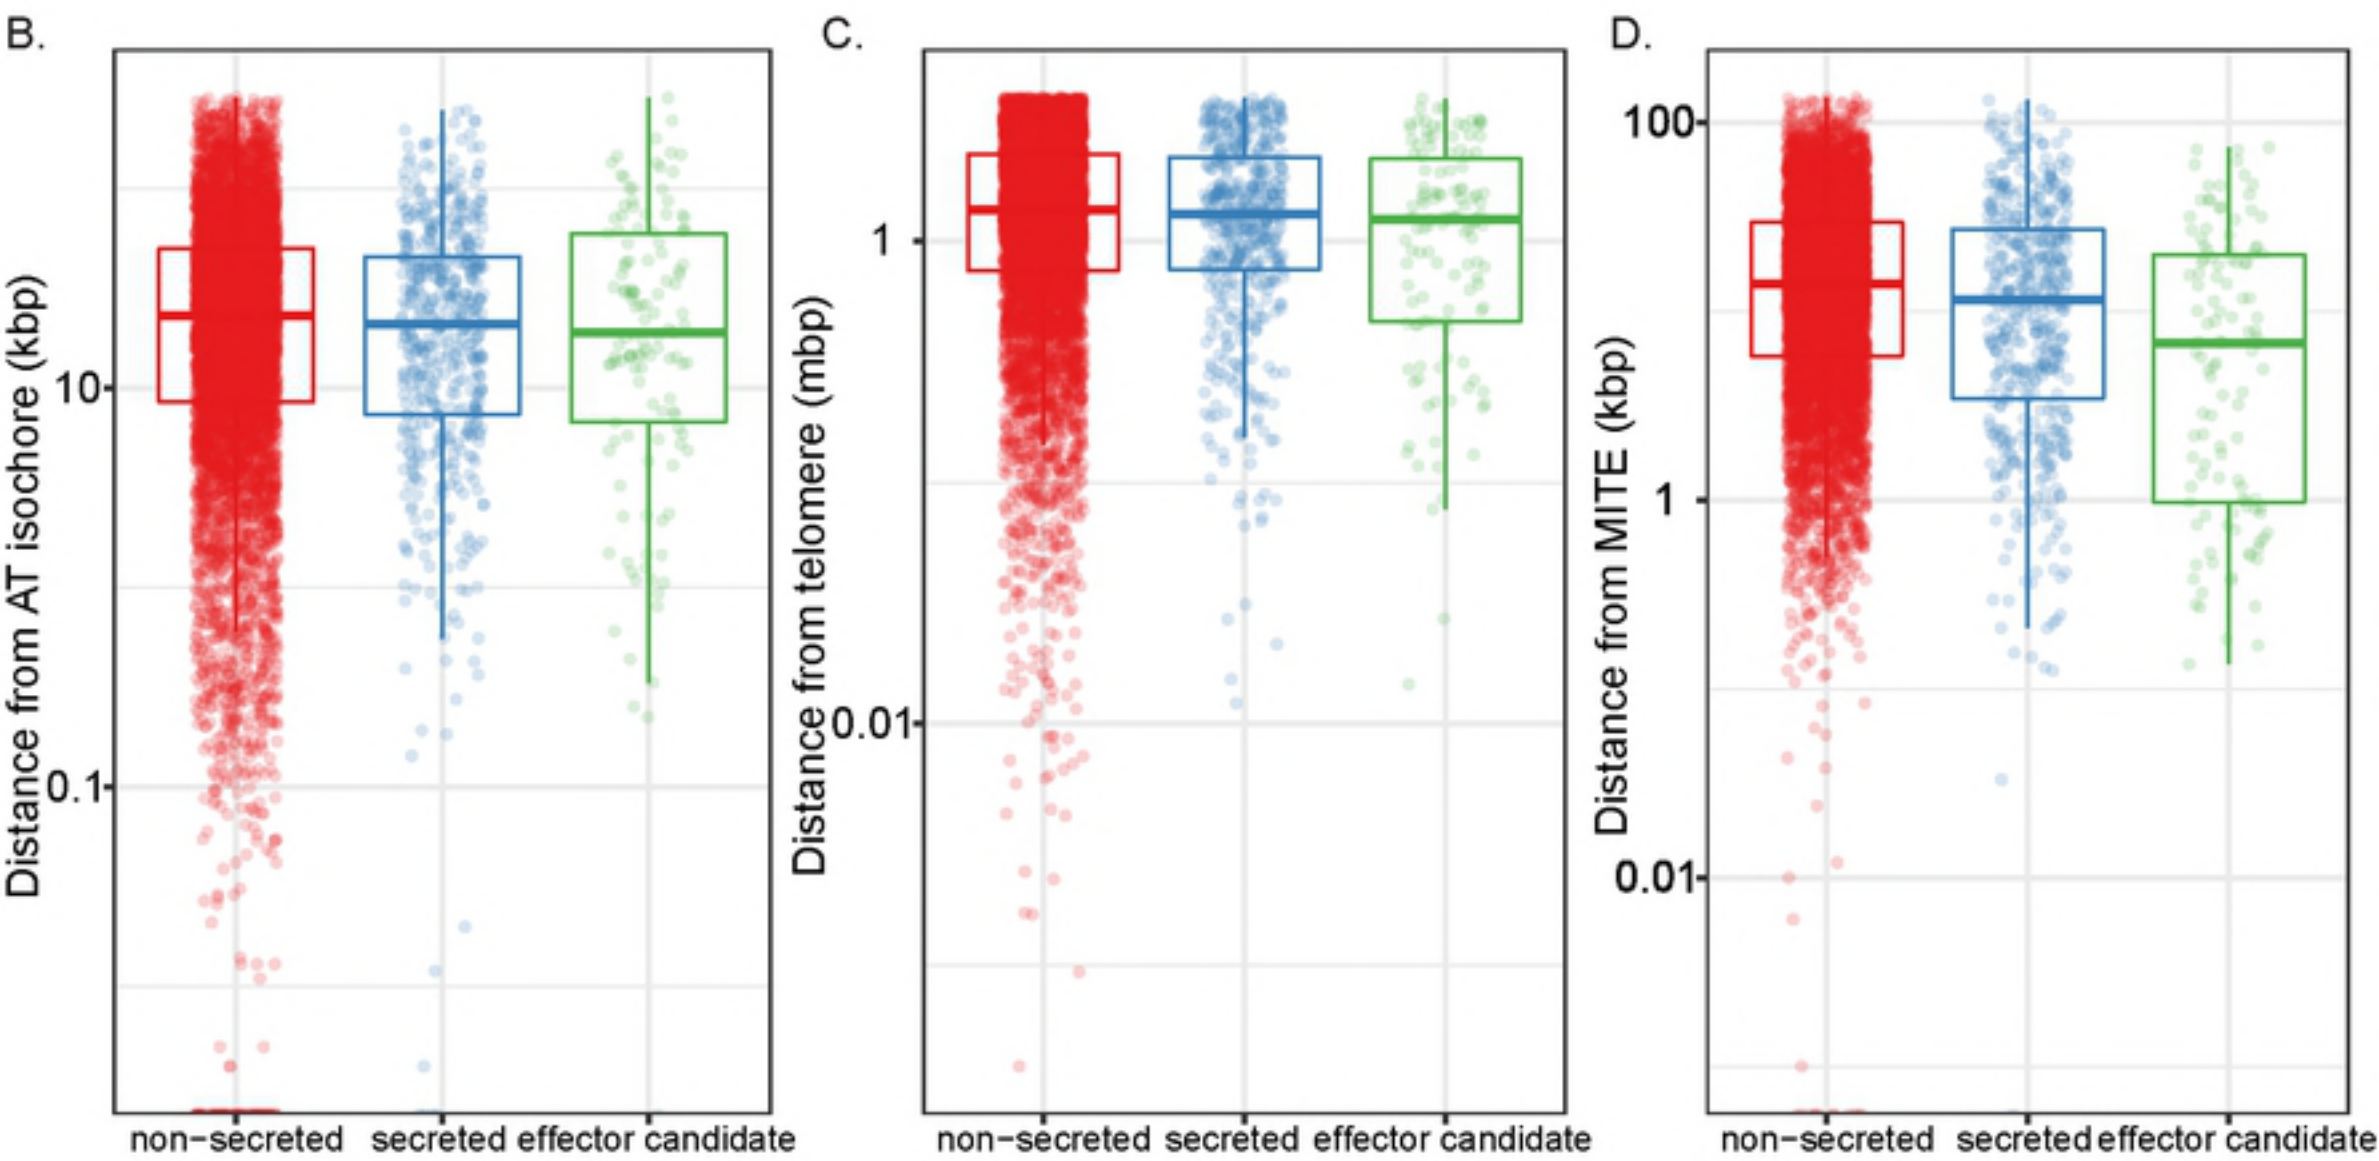

Figure 1



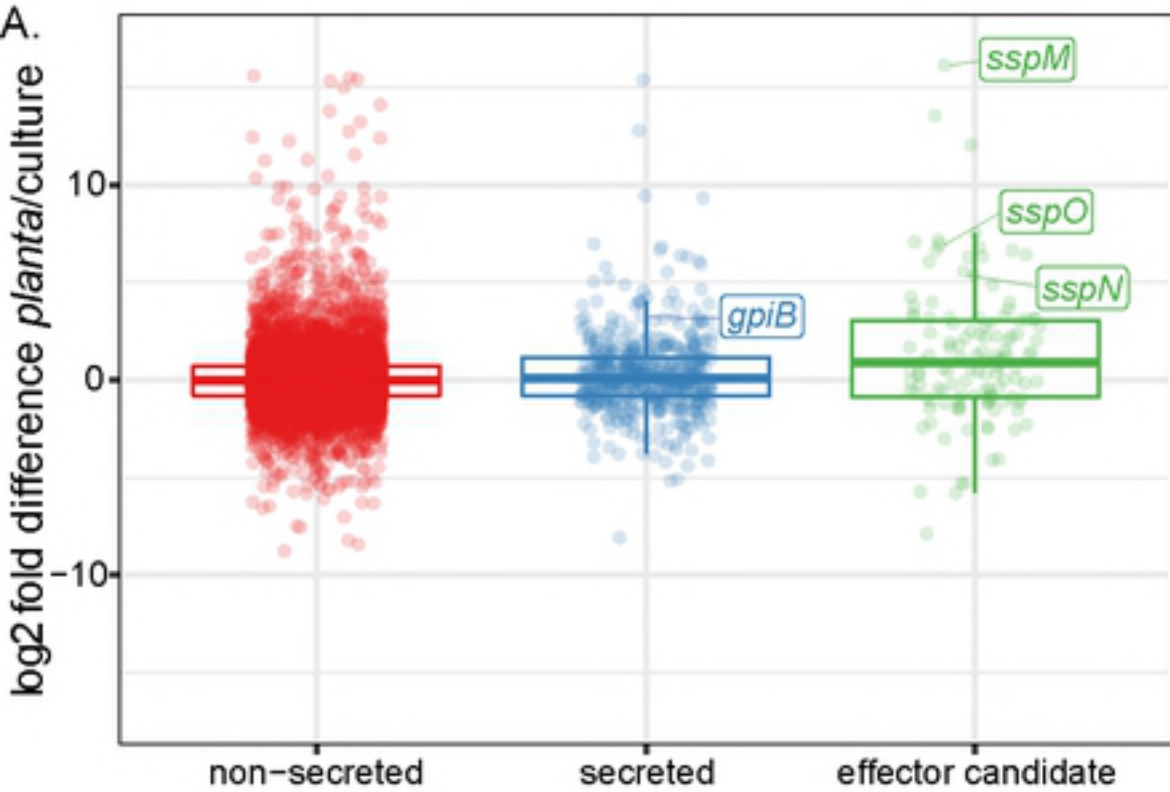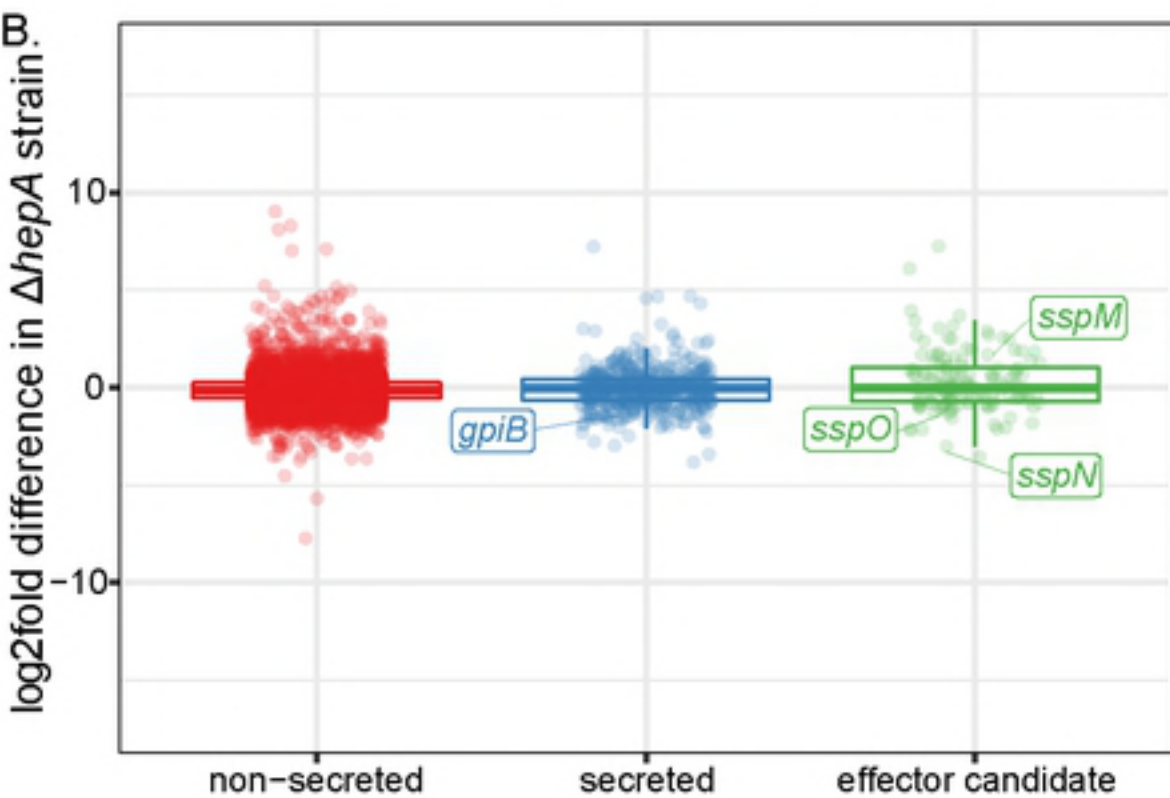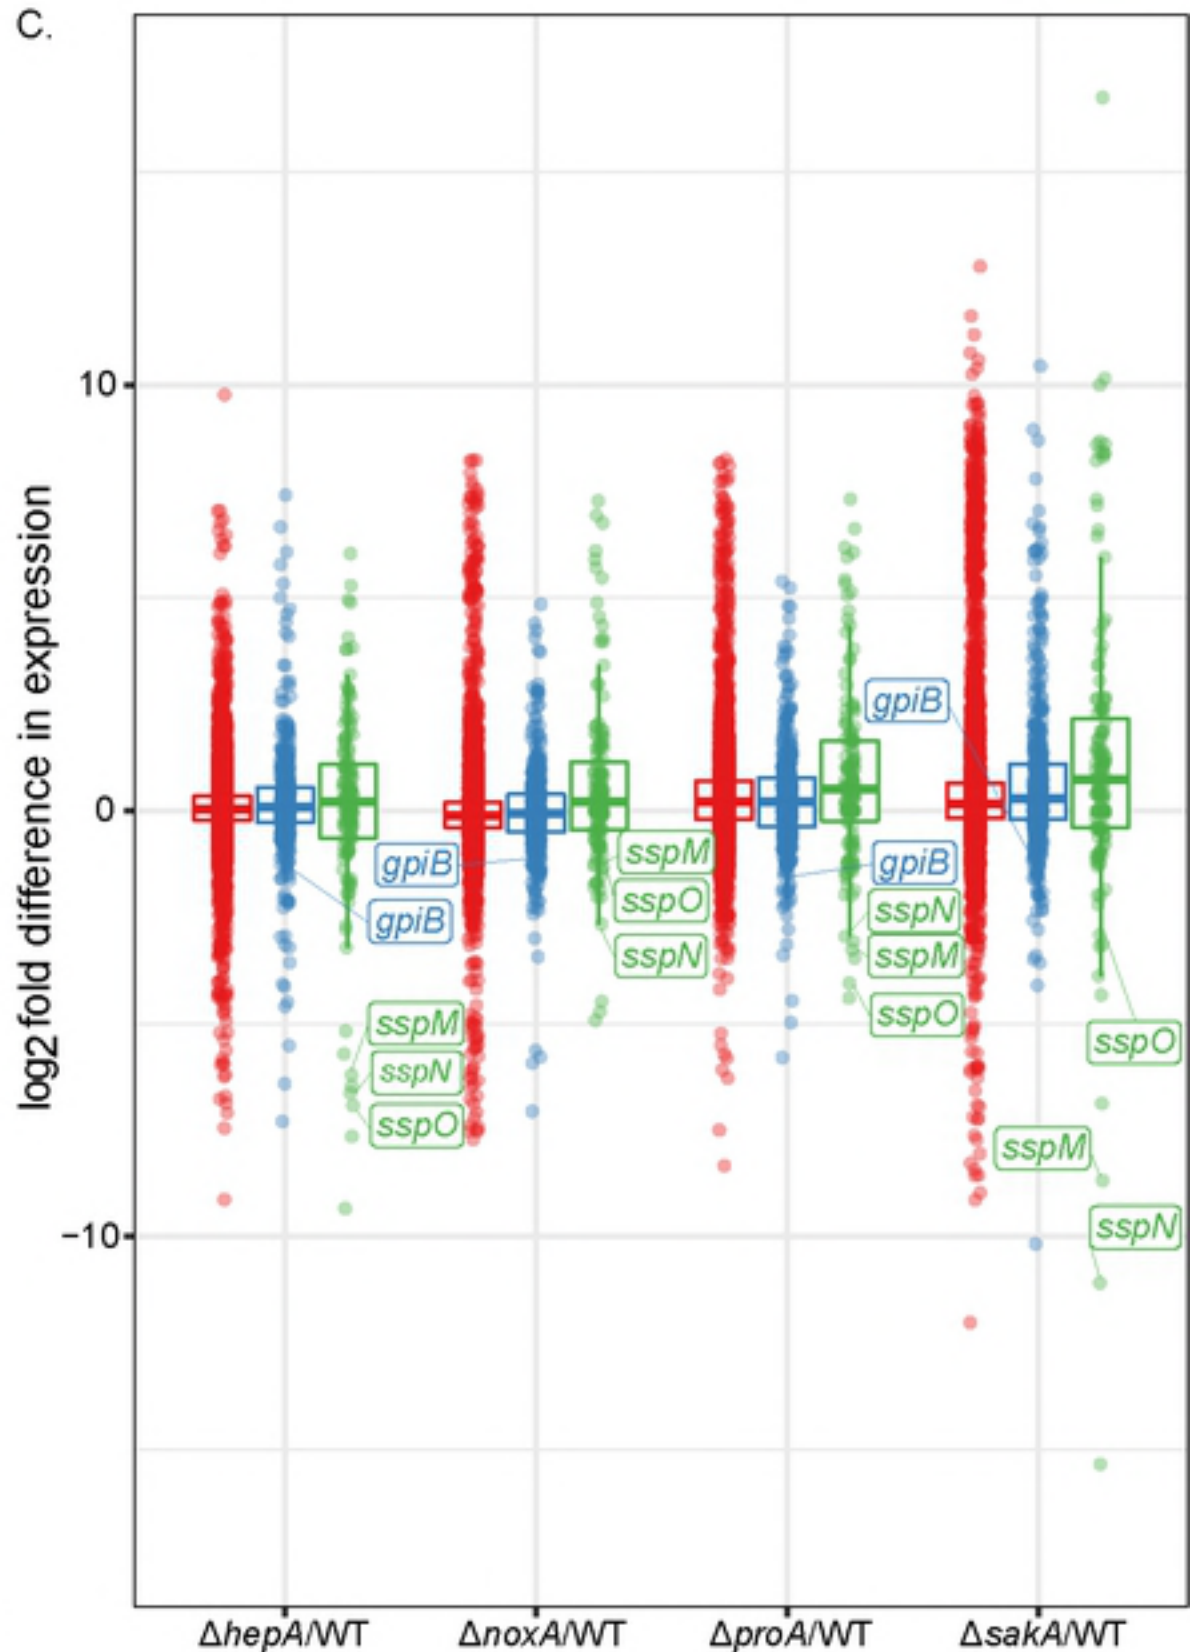

Figure 2

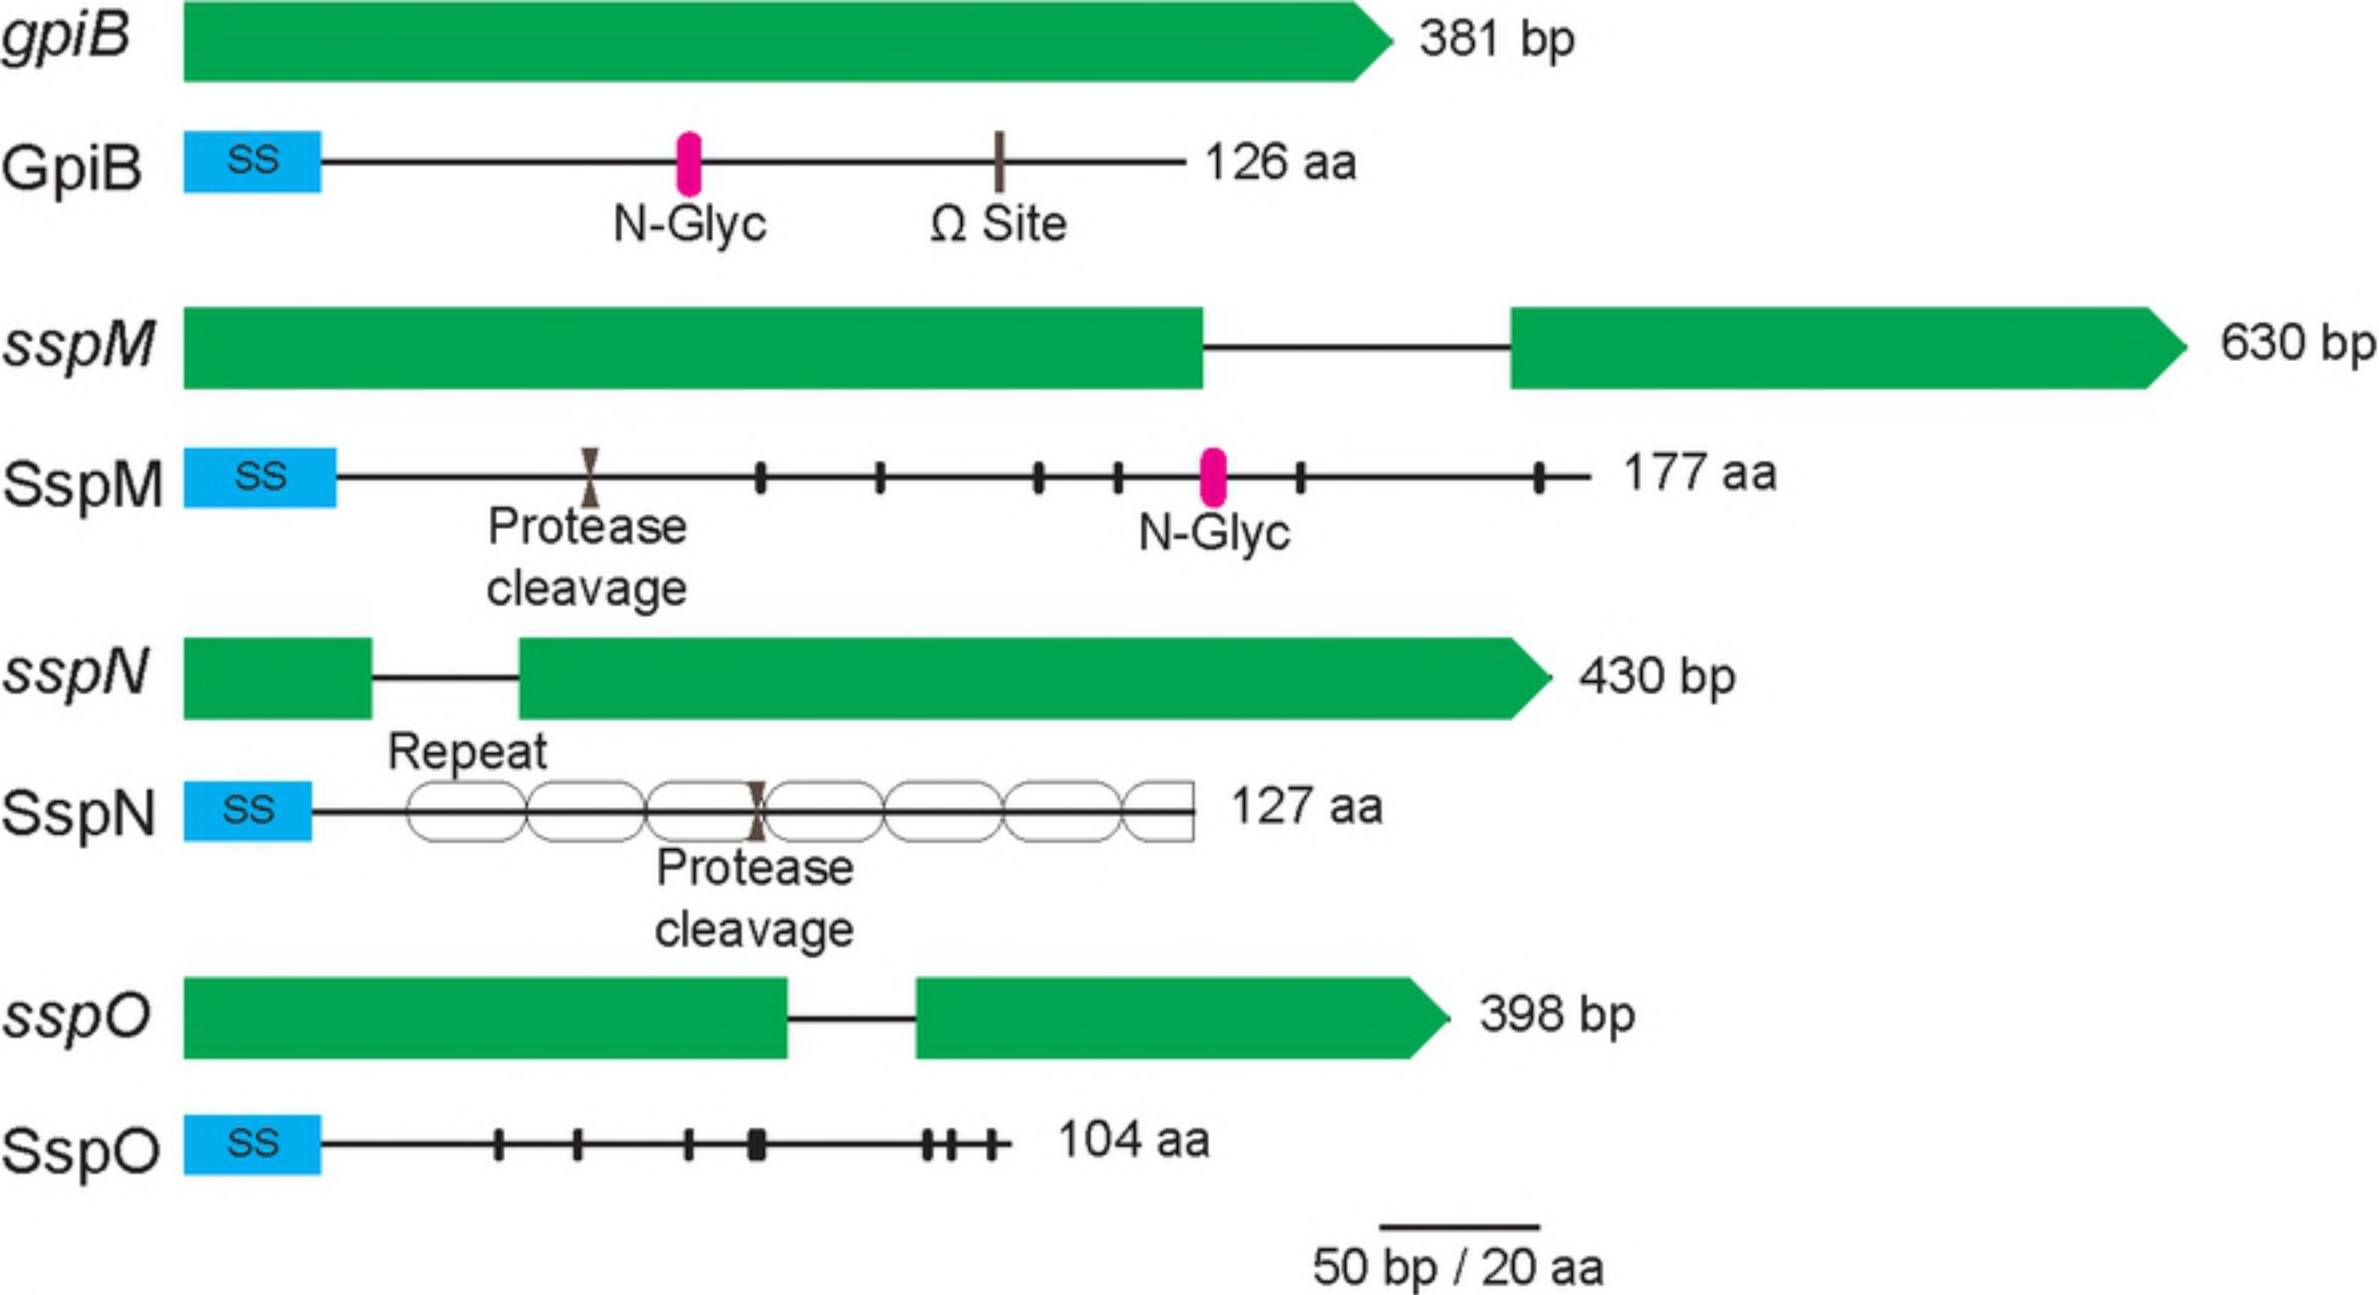

Figure 3

pSUC2T7M13ORI

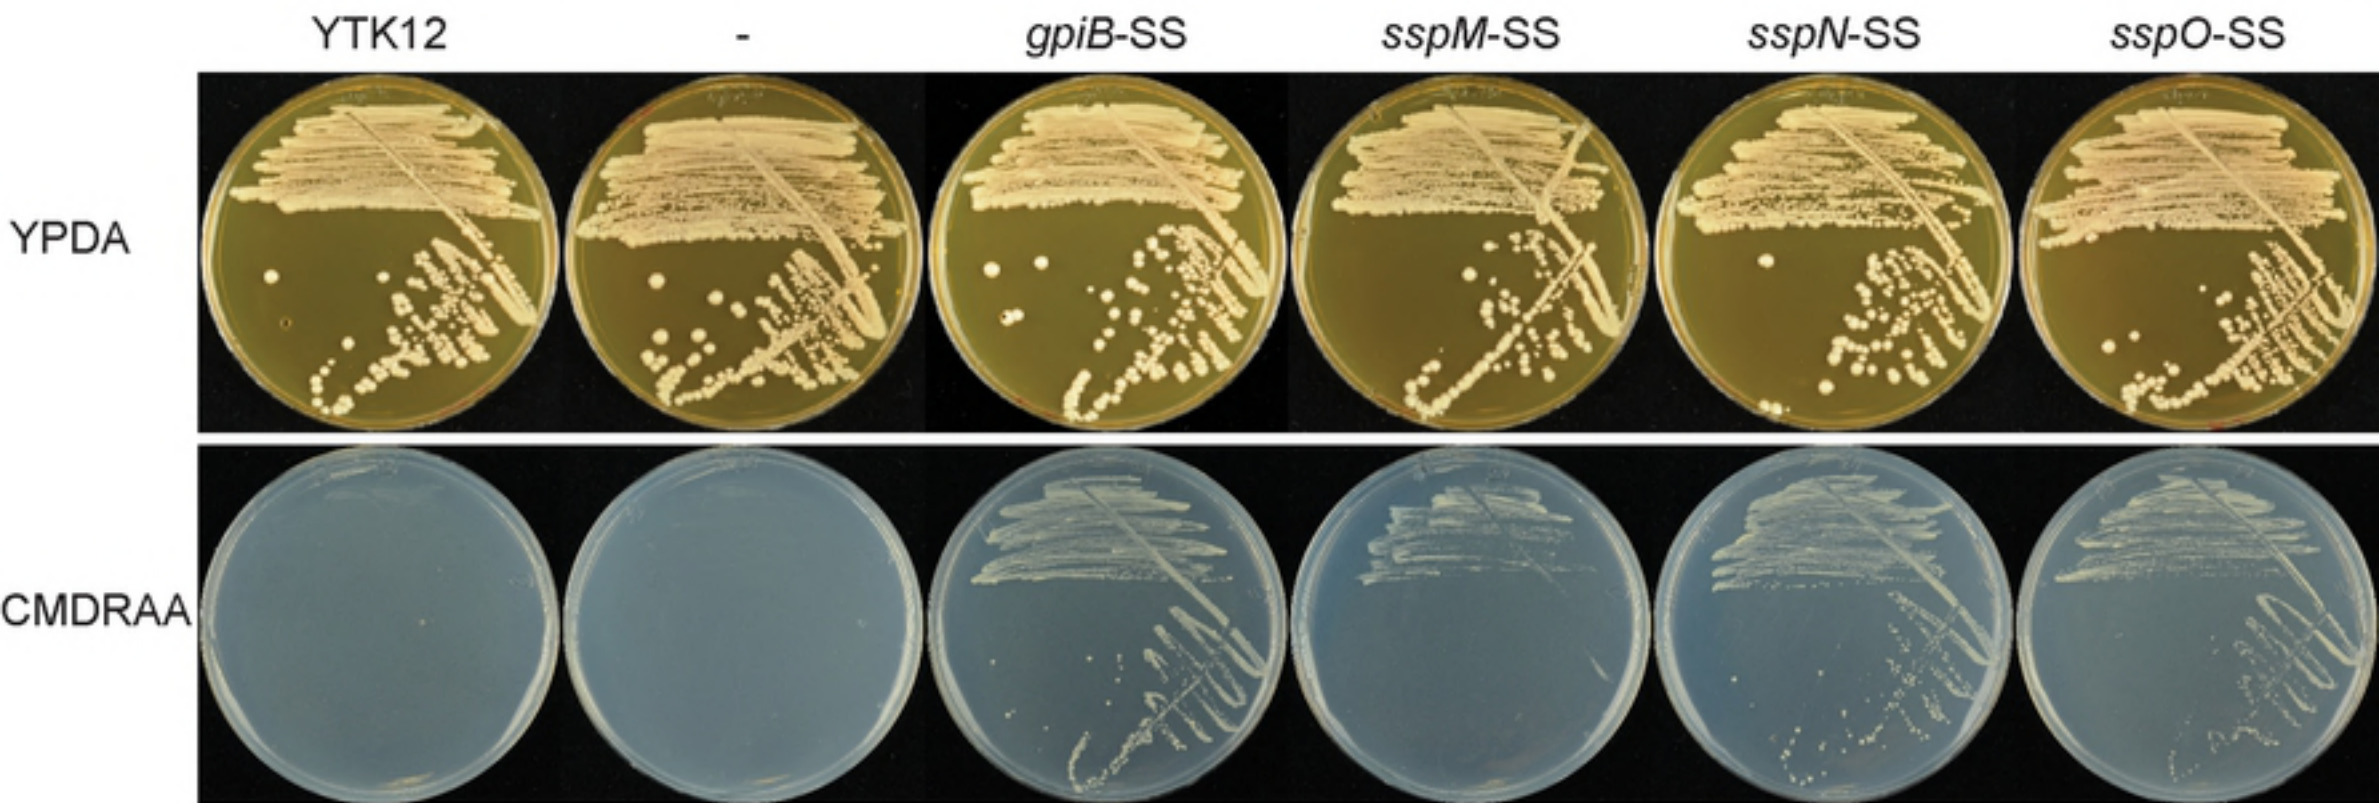

Figure 4



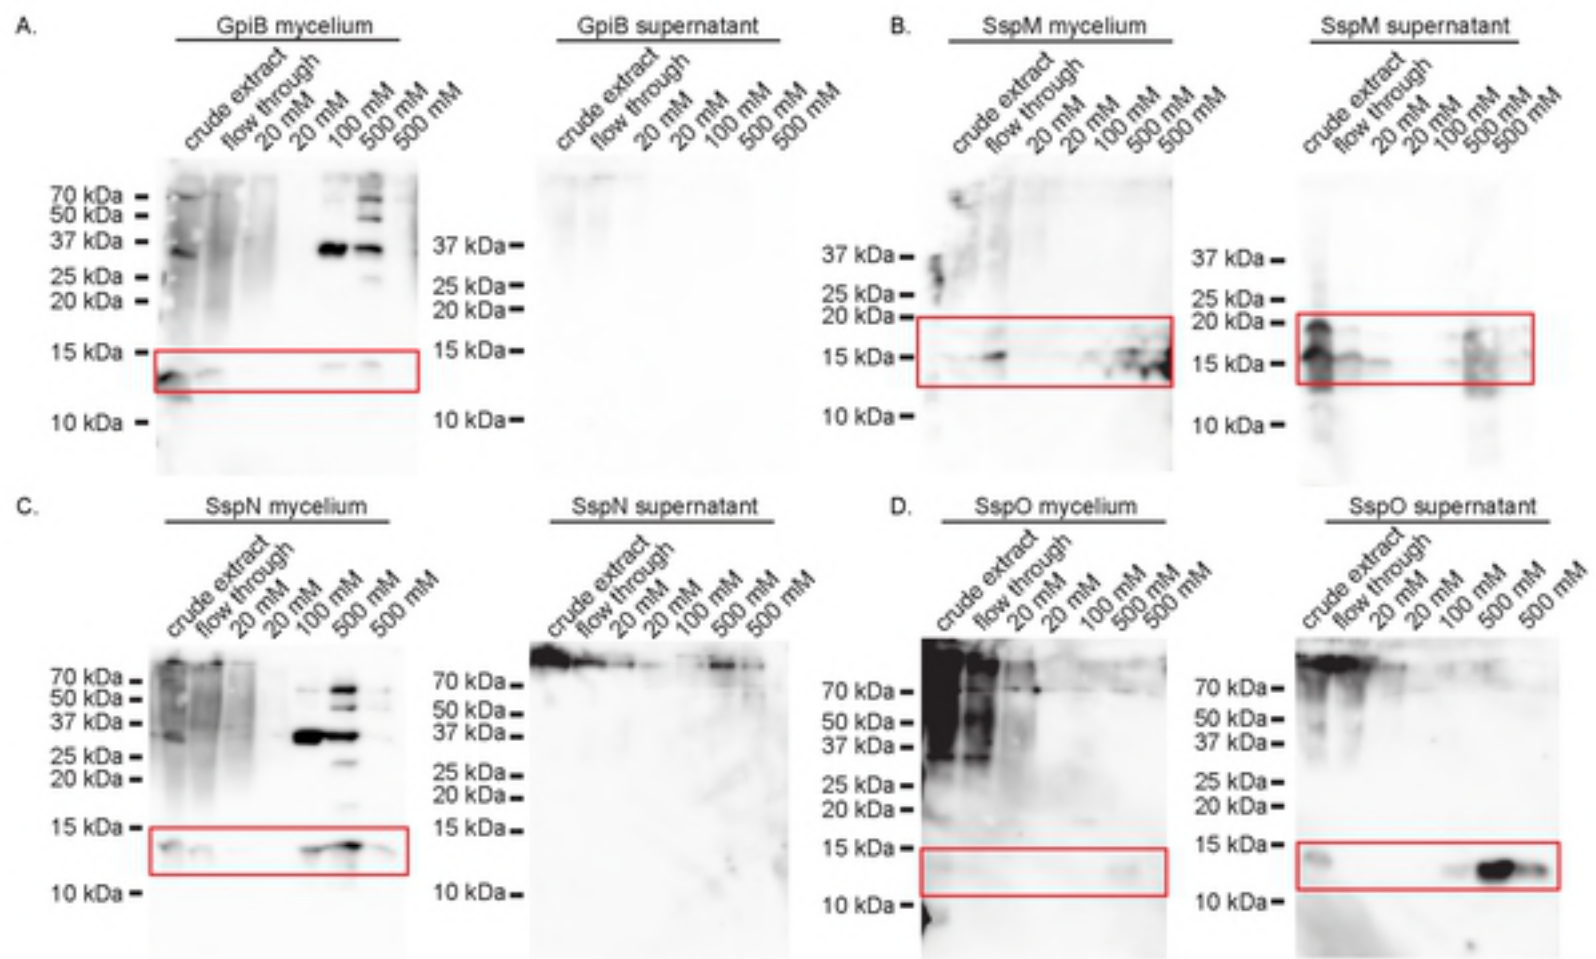

Figure 5



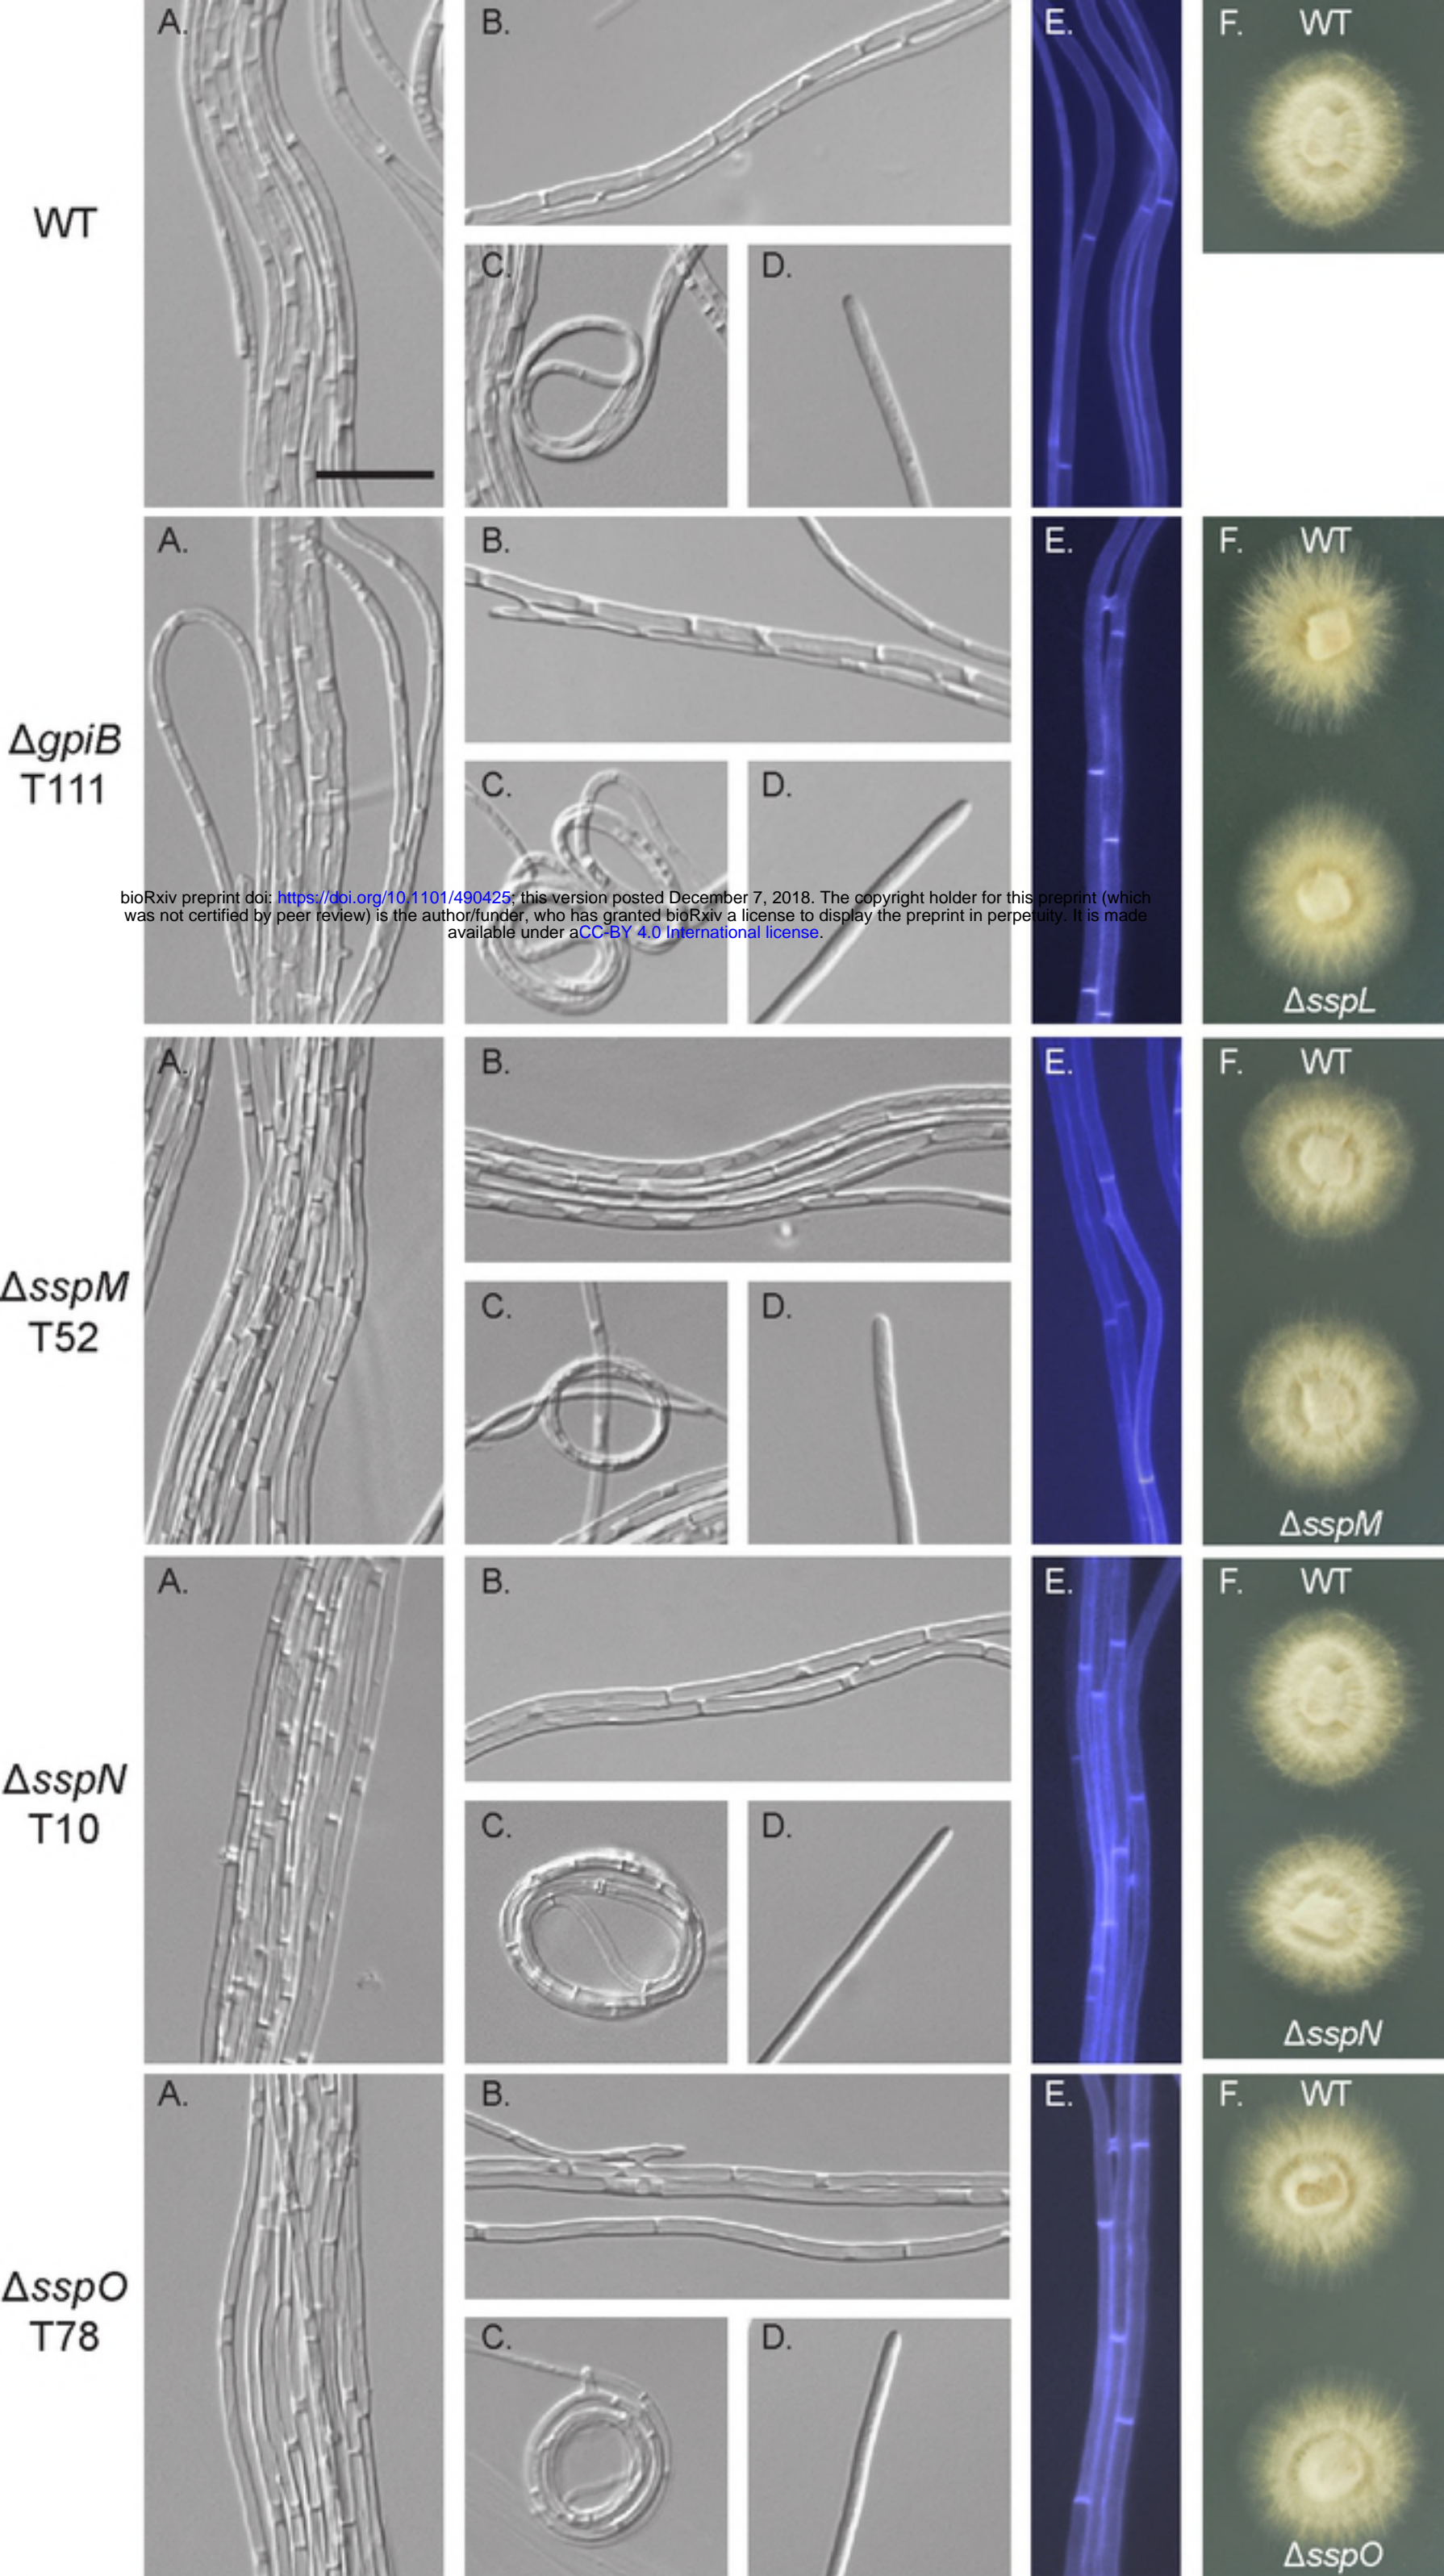

Figure 6



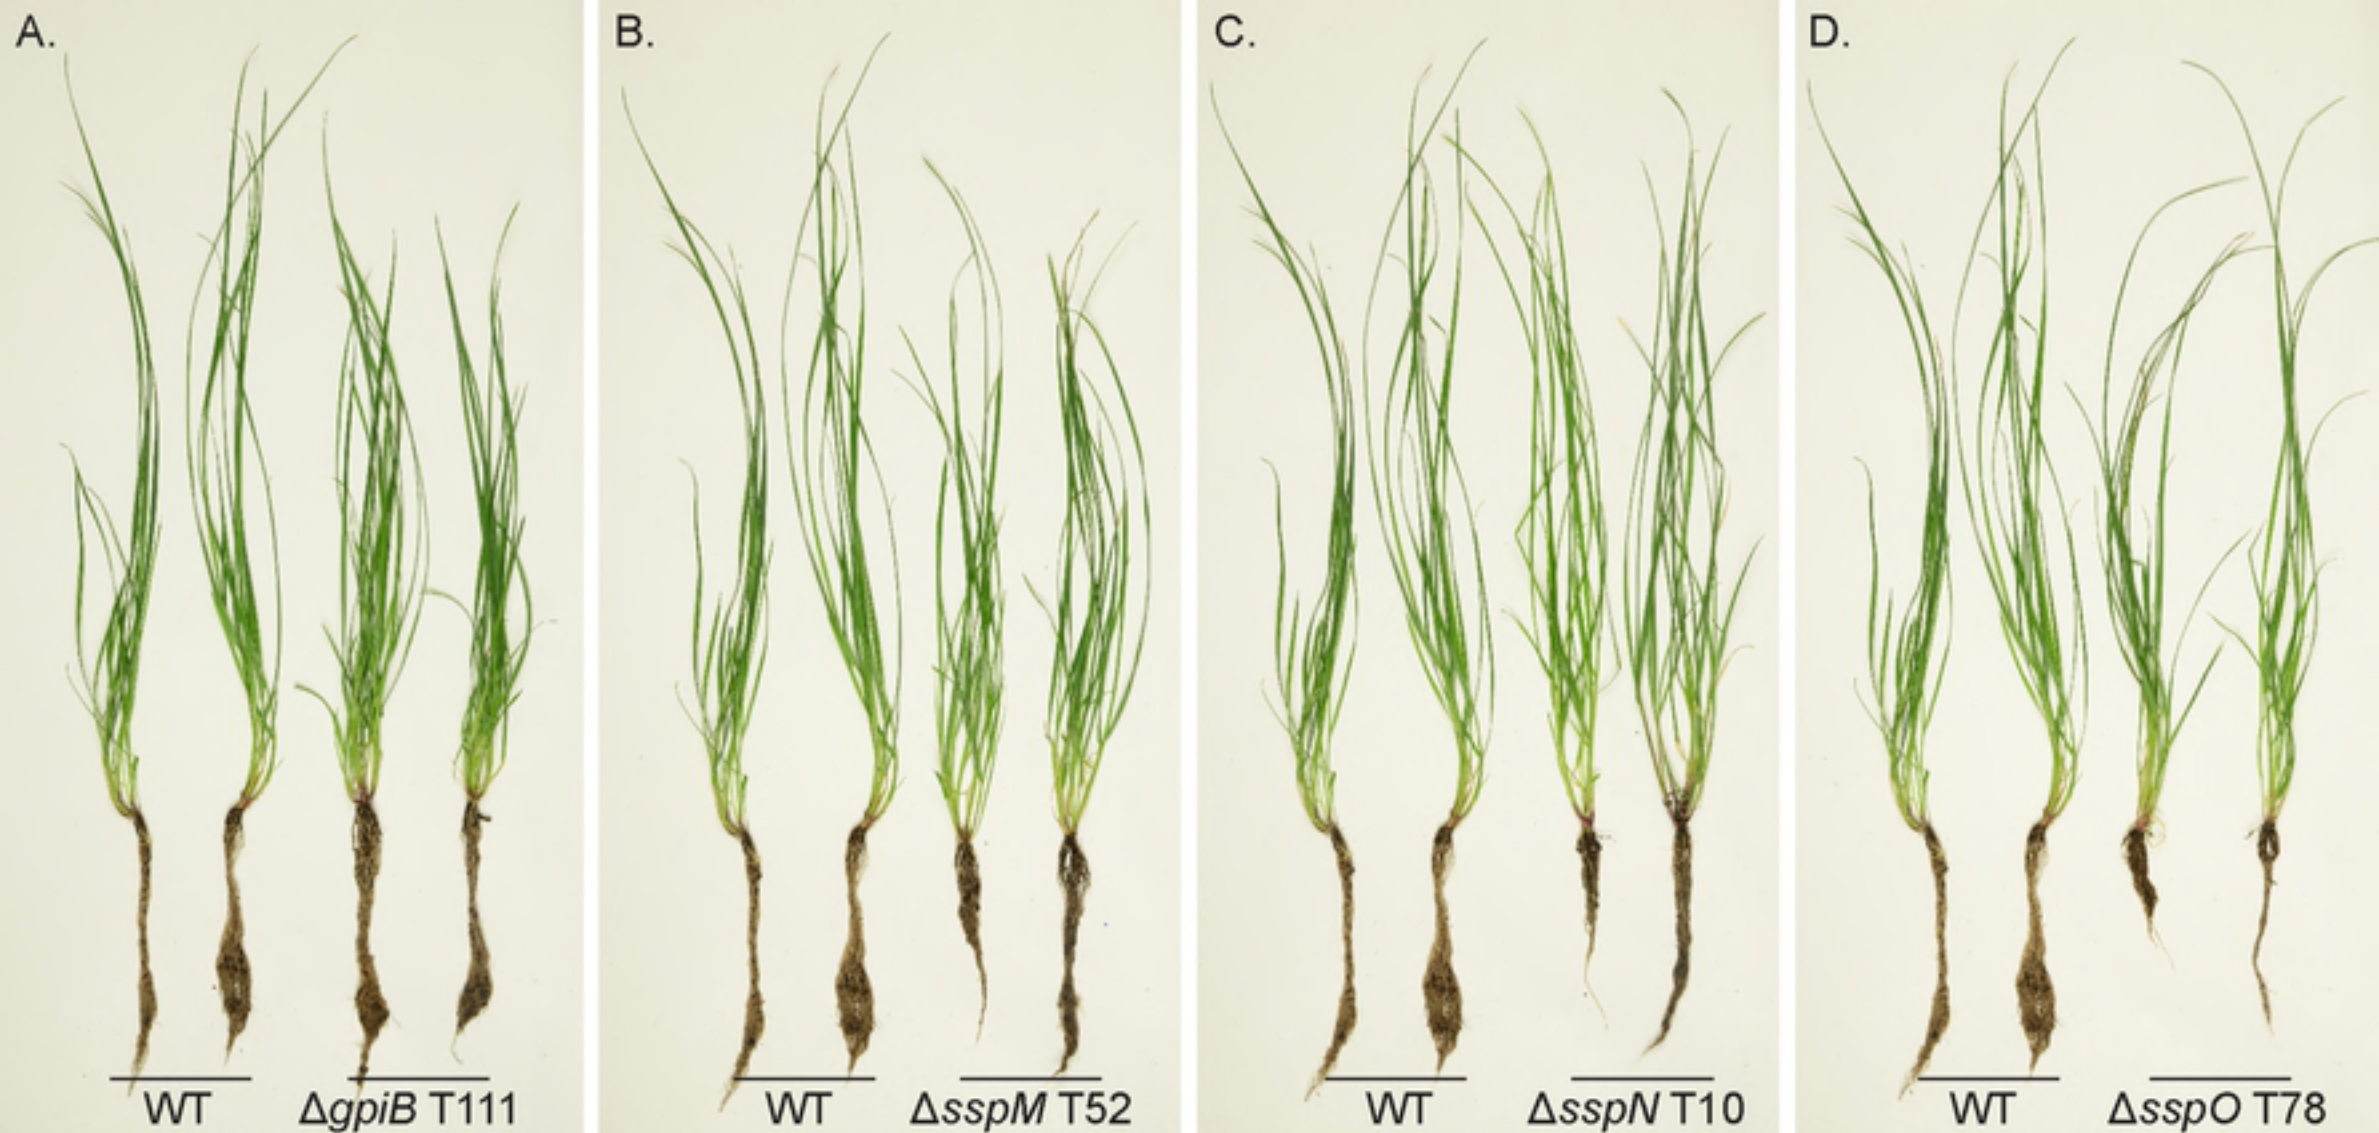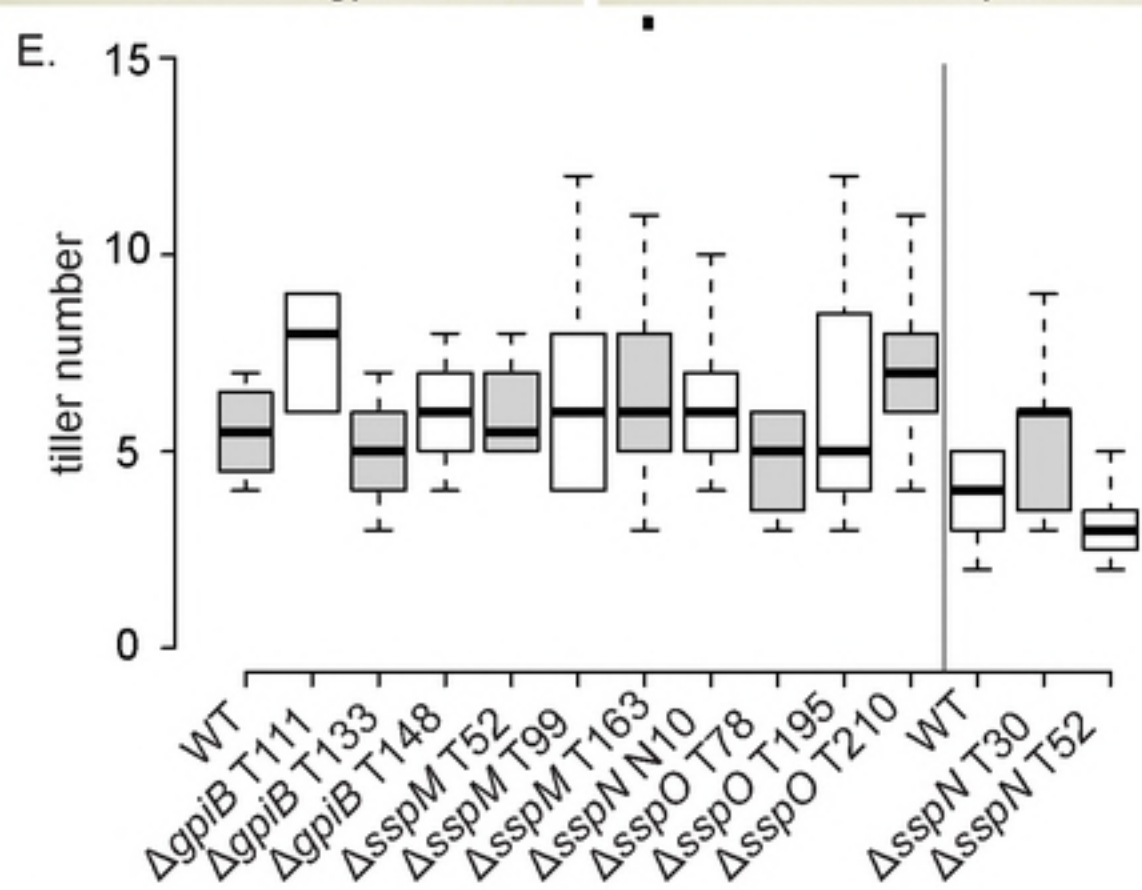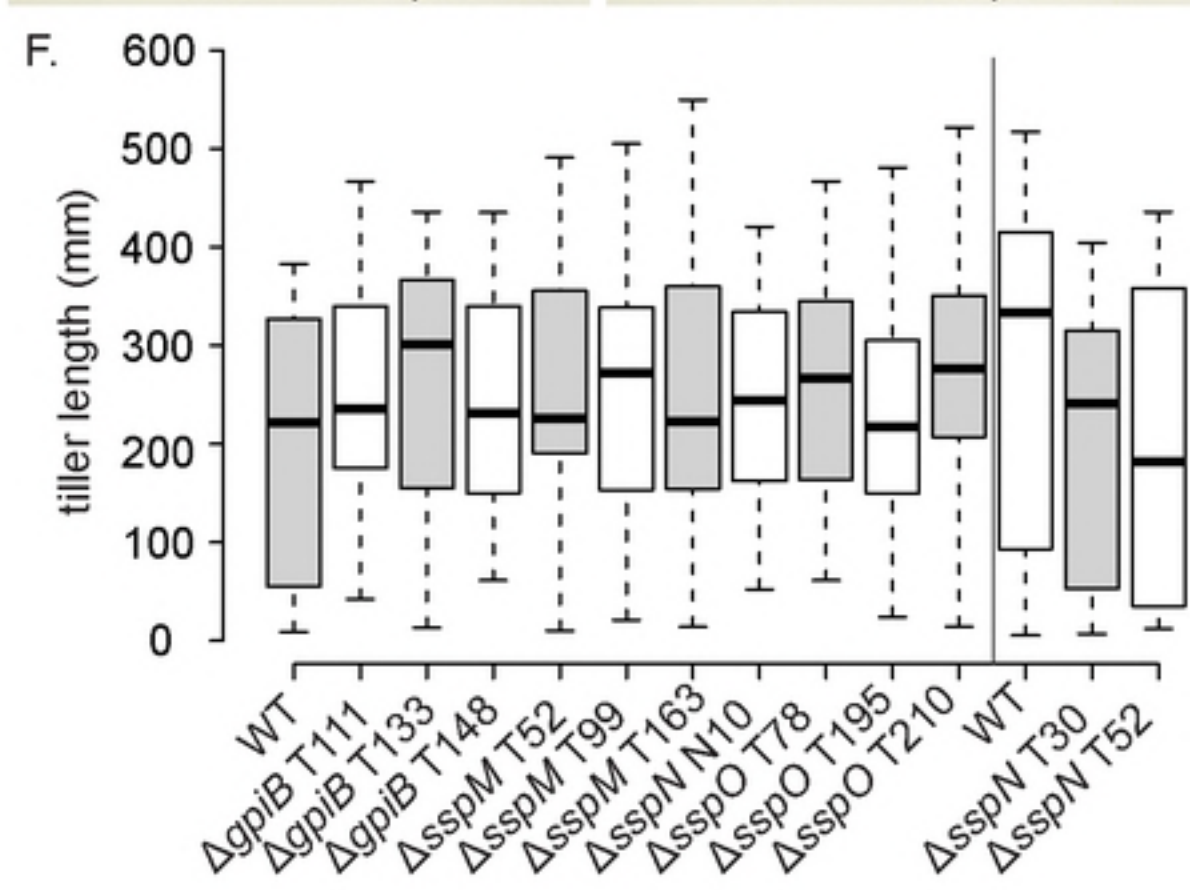

Figure 7



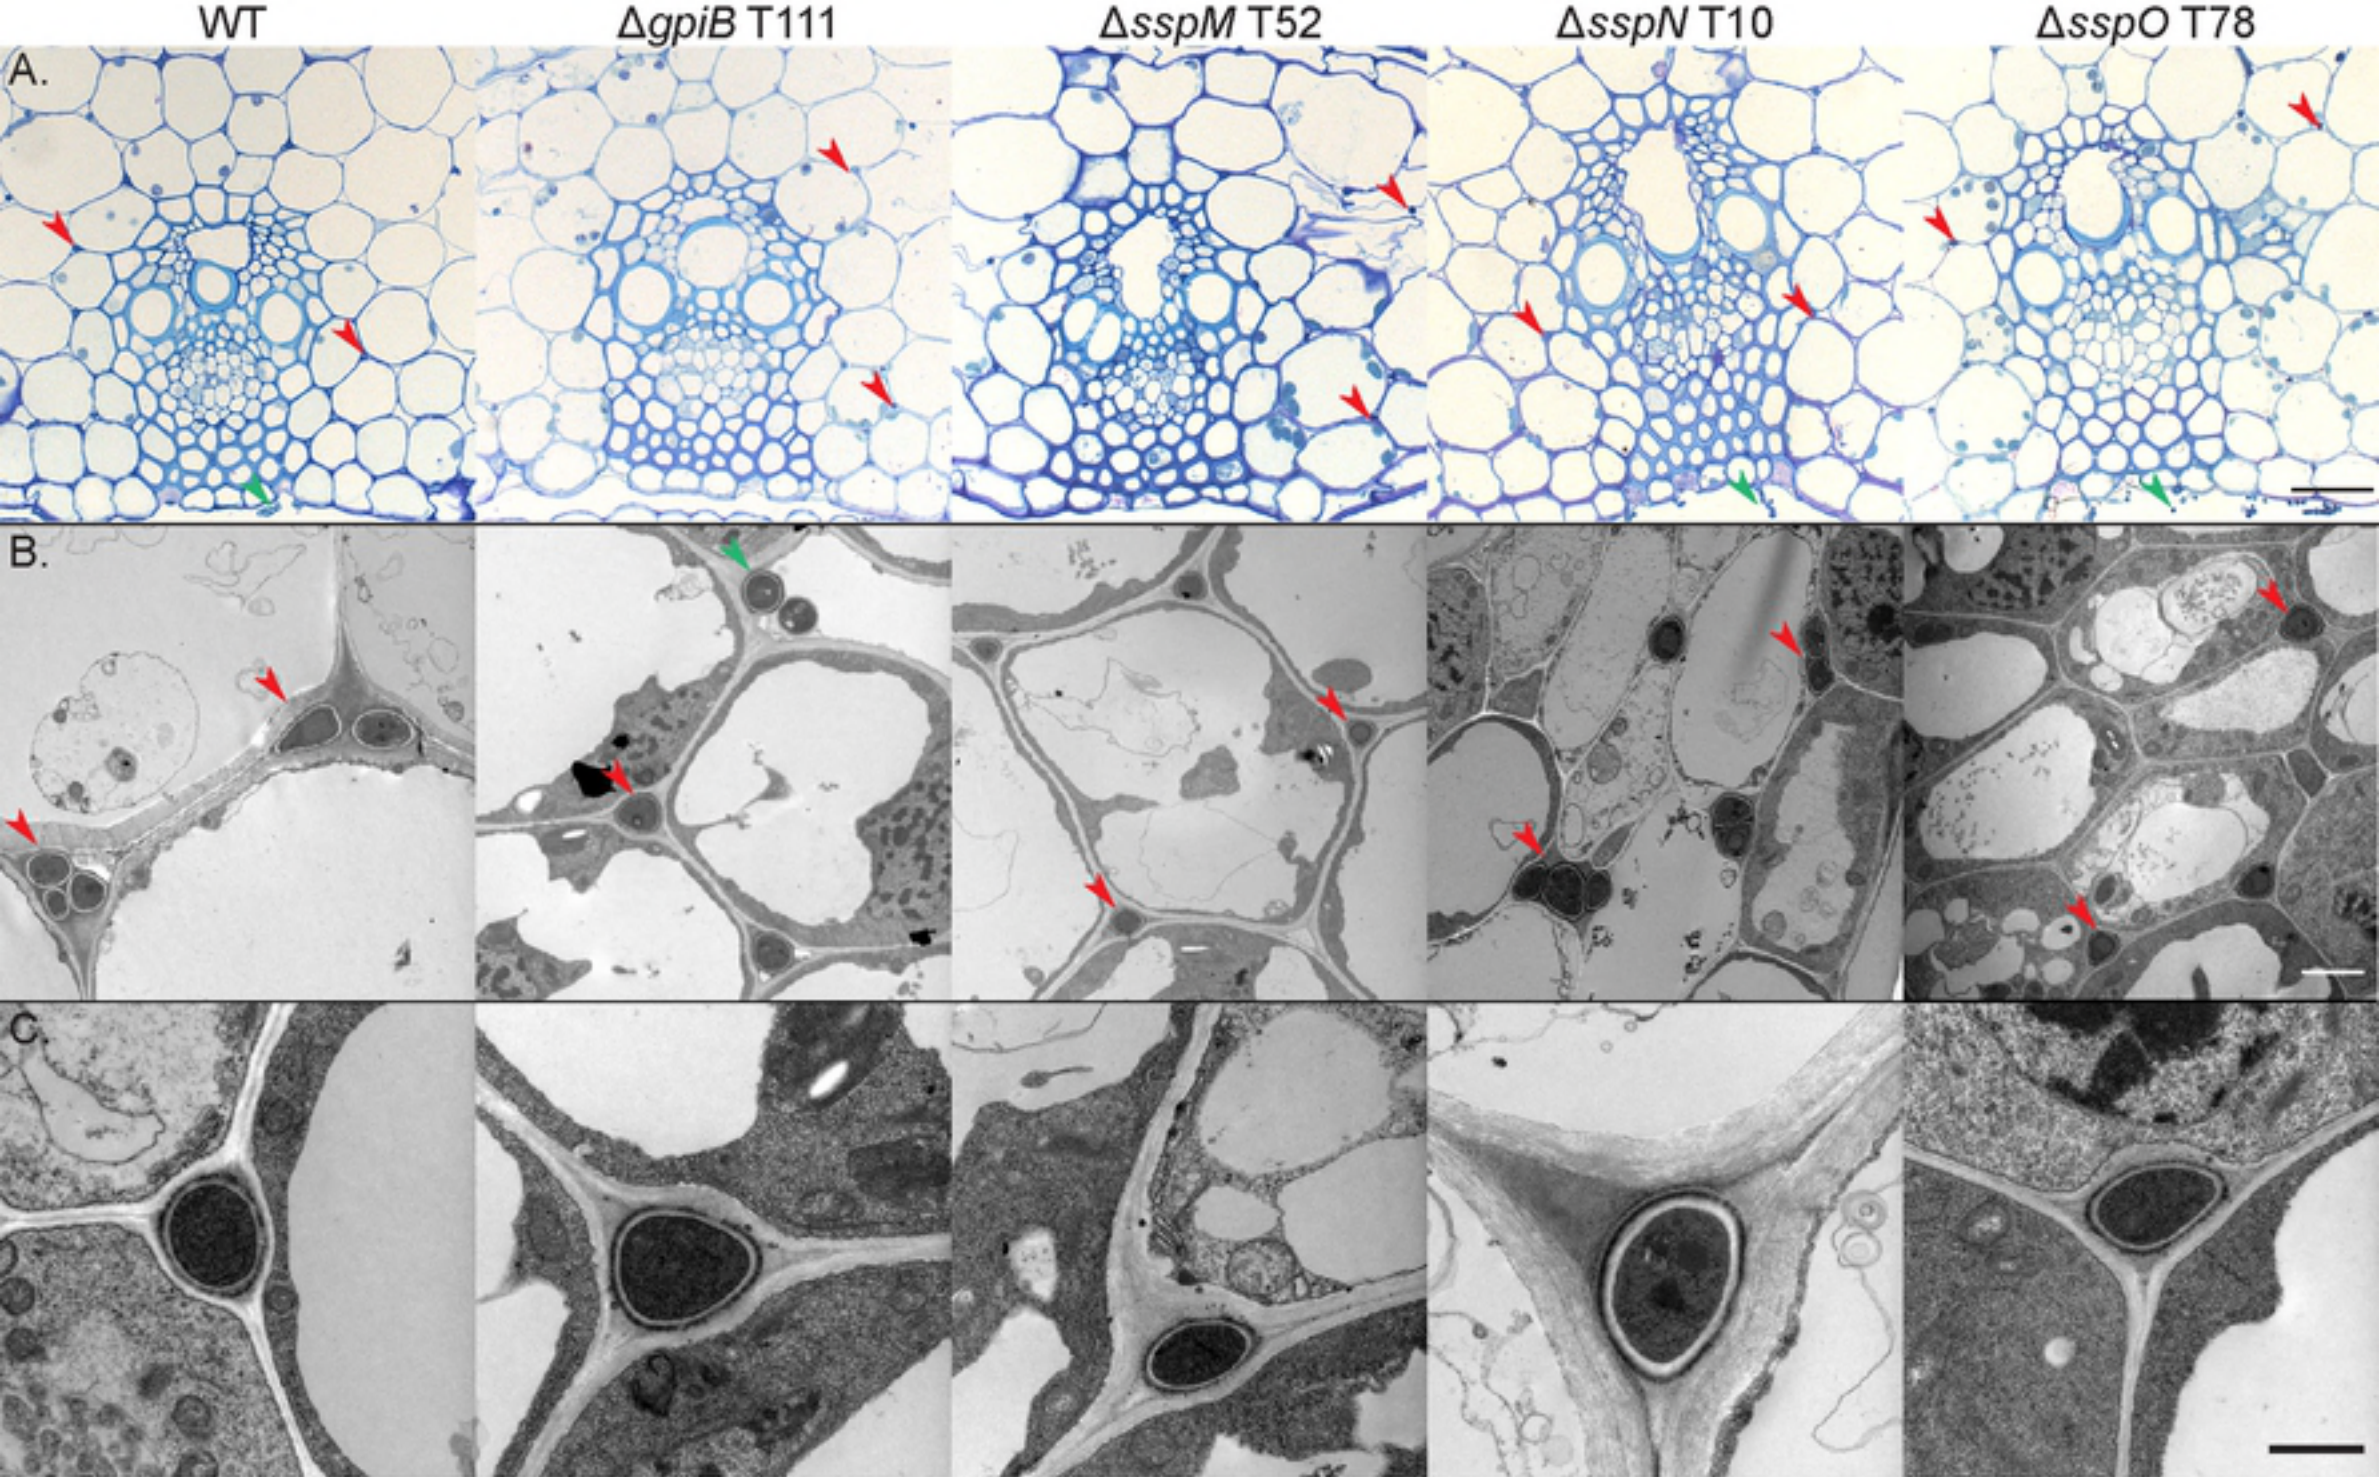

Figure 8



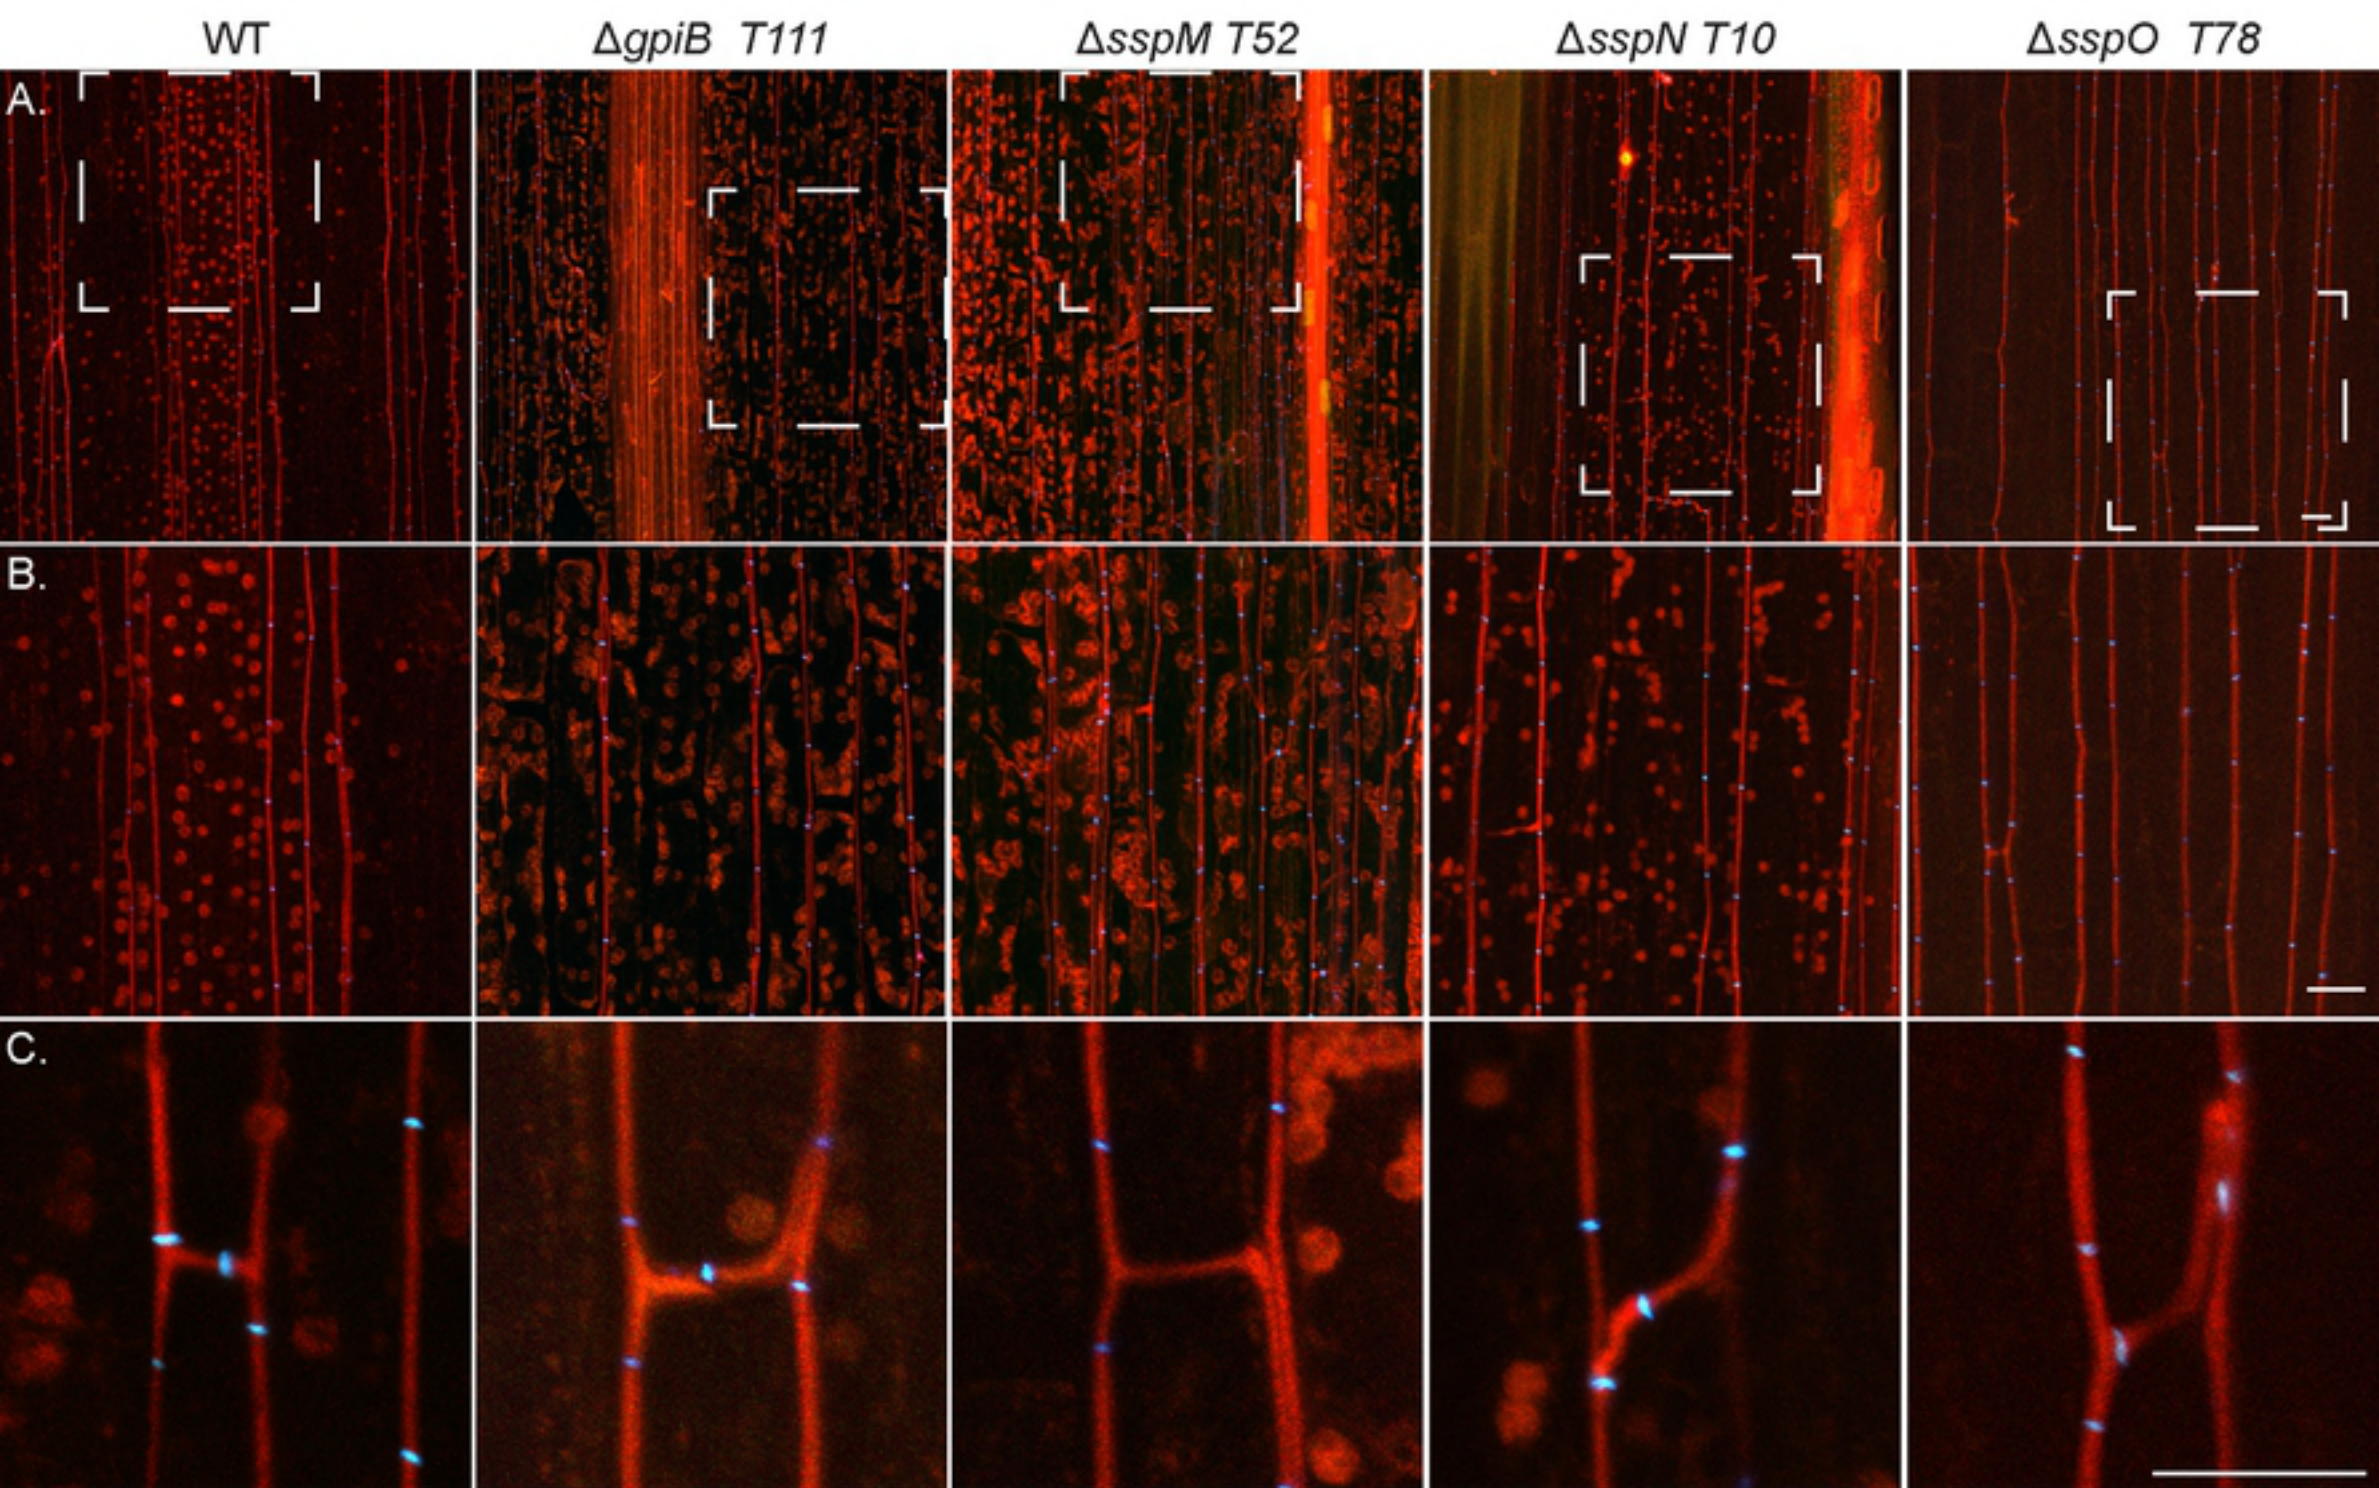

Figure 9



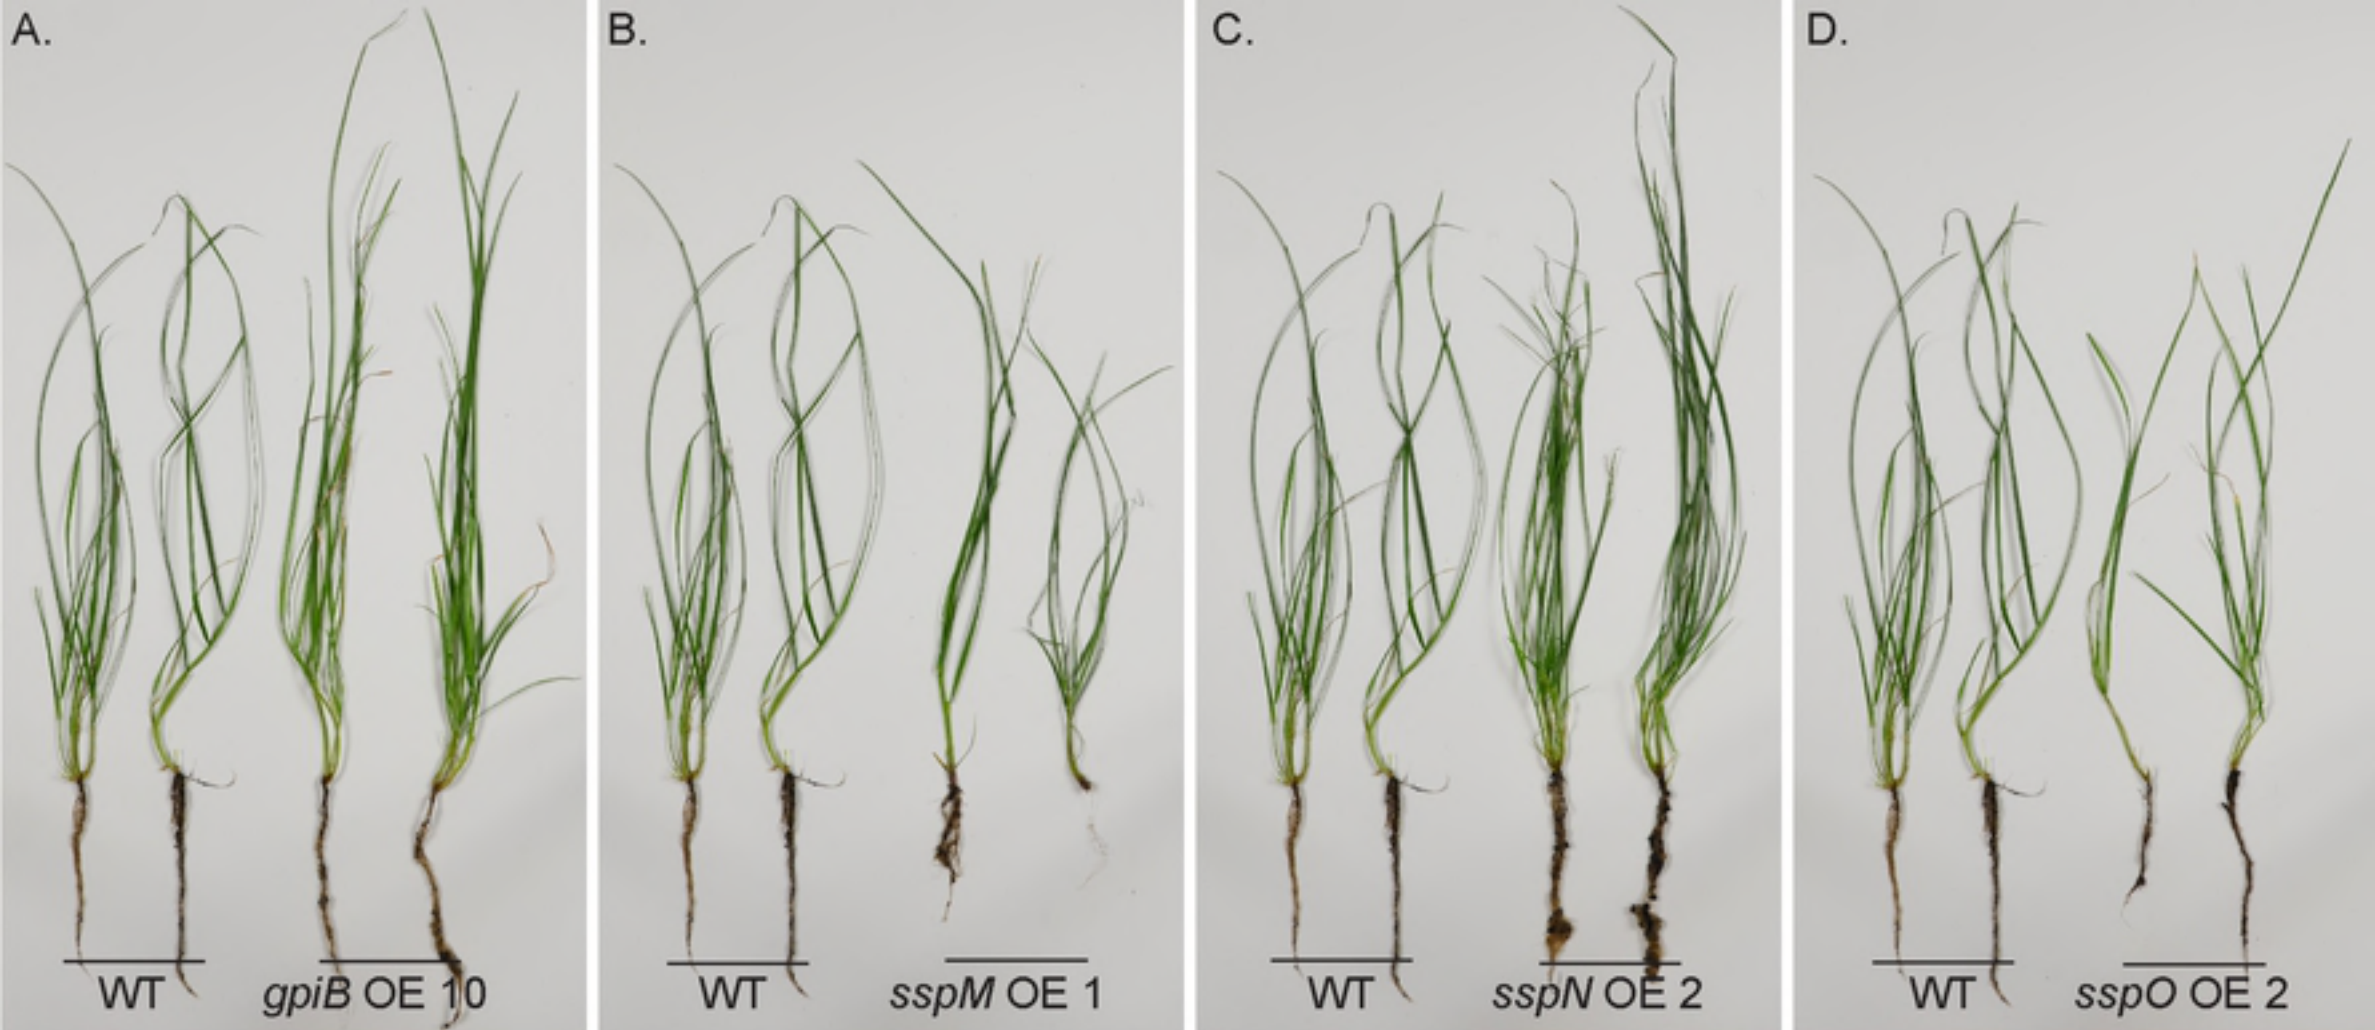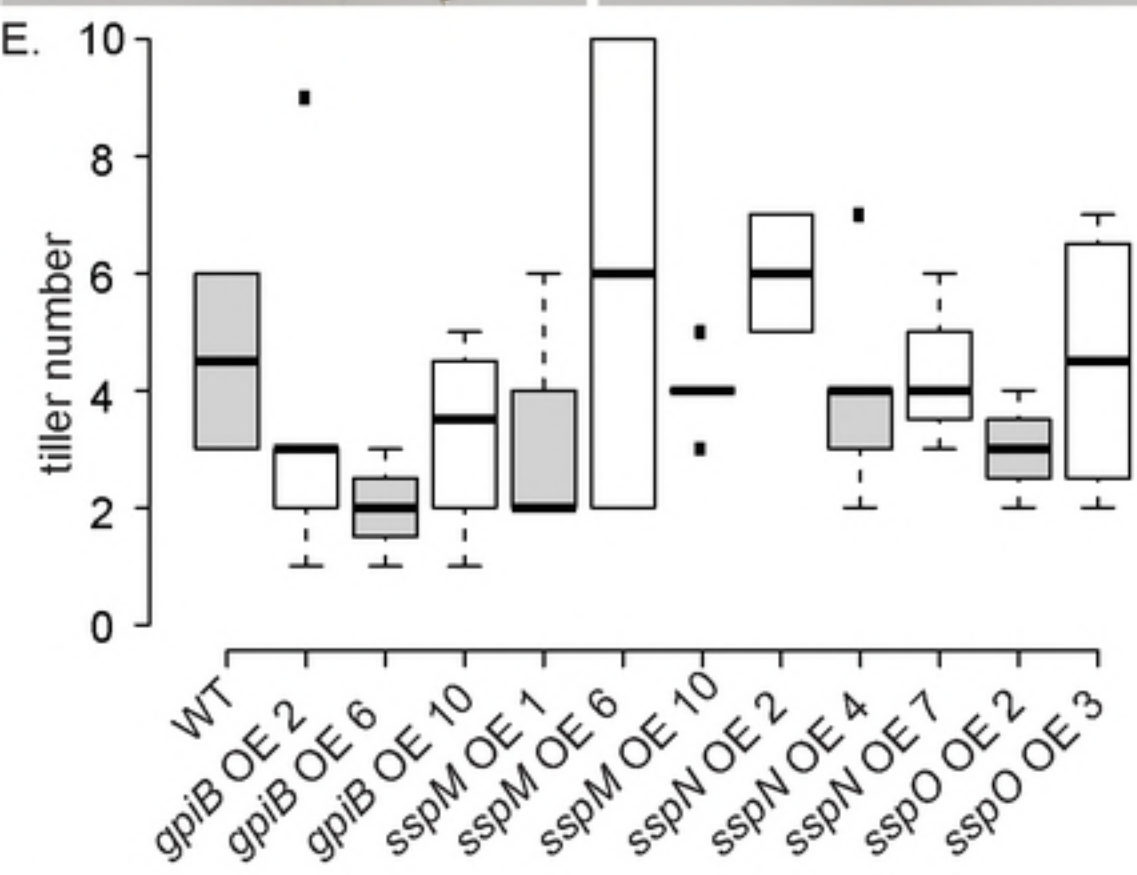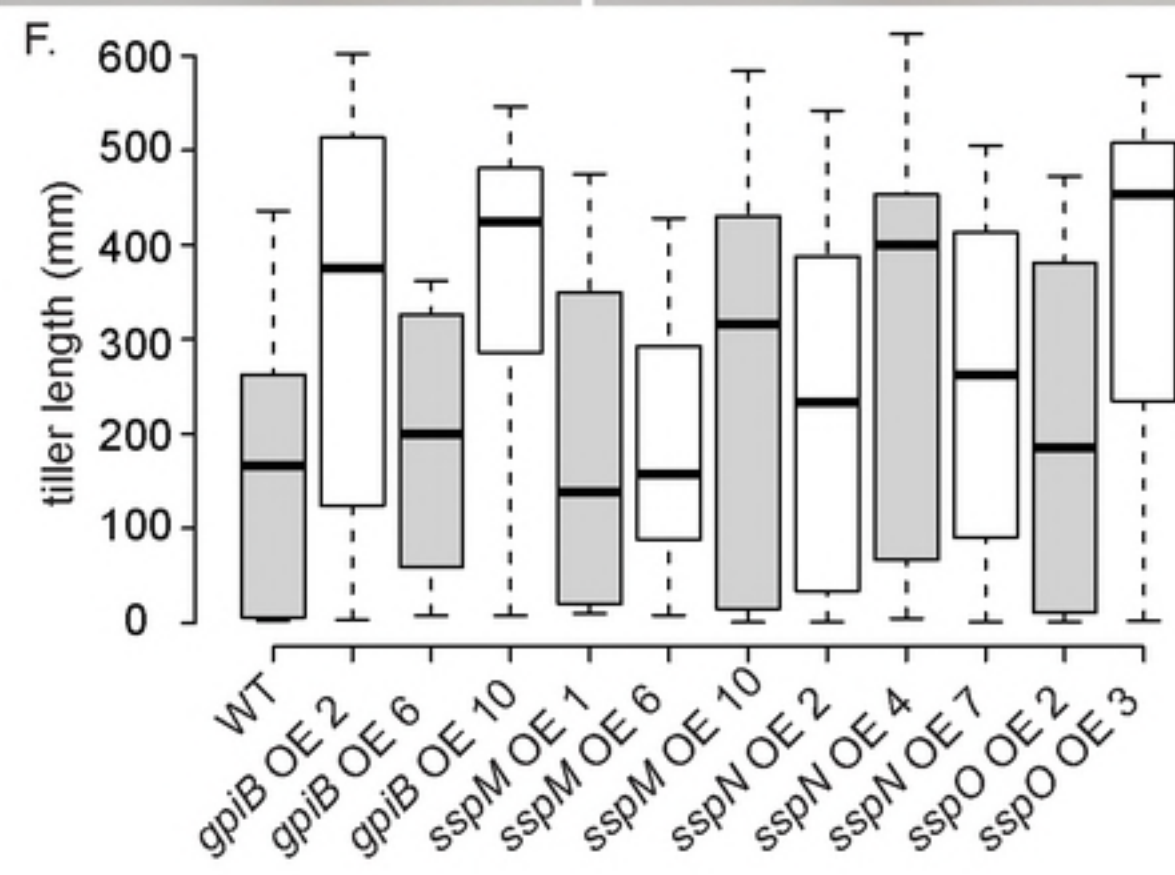

Figure 10



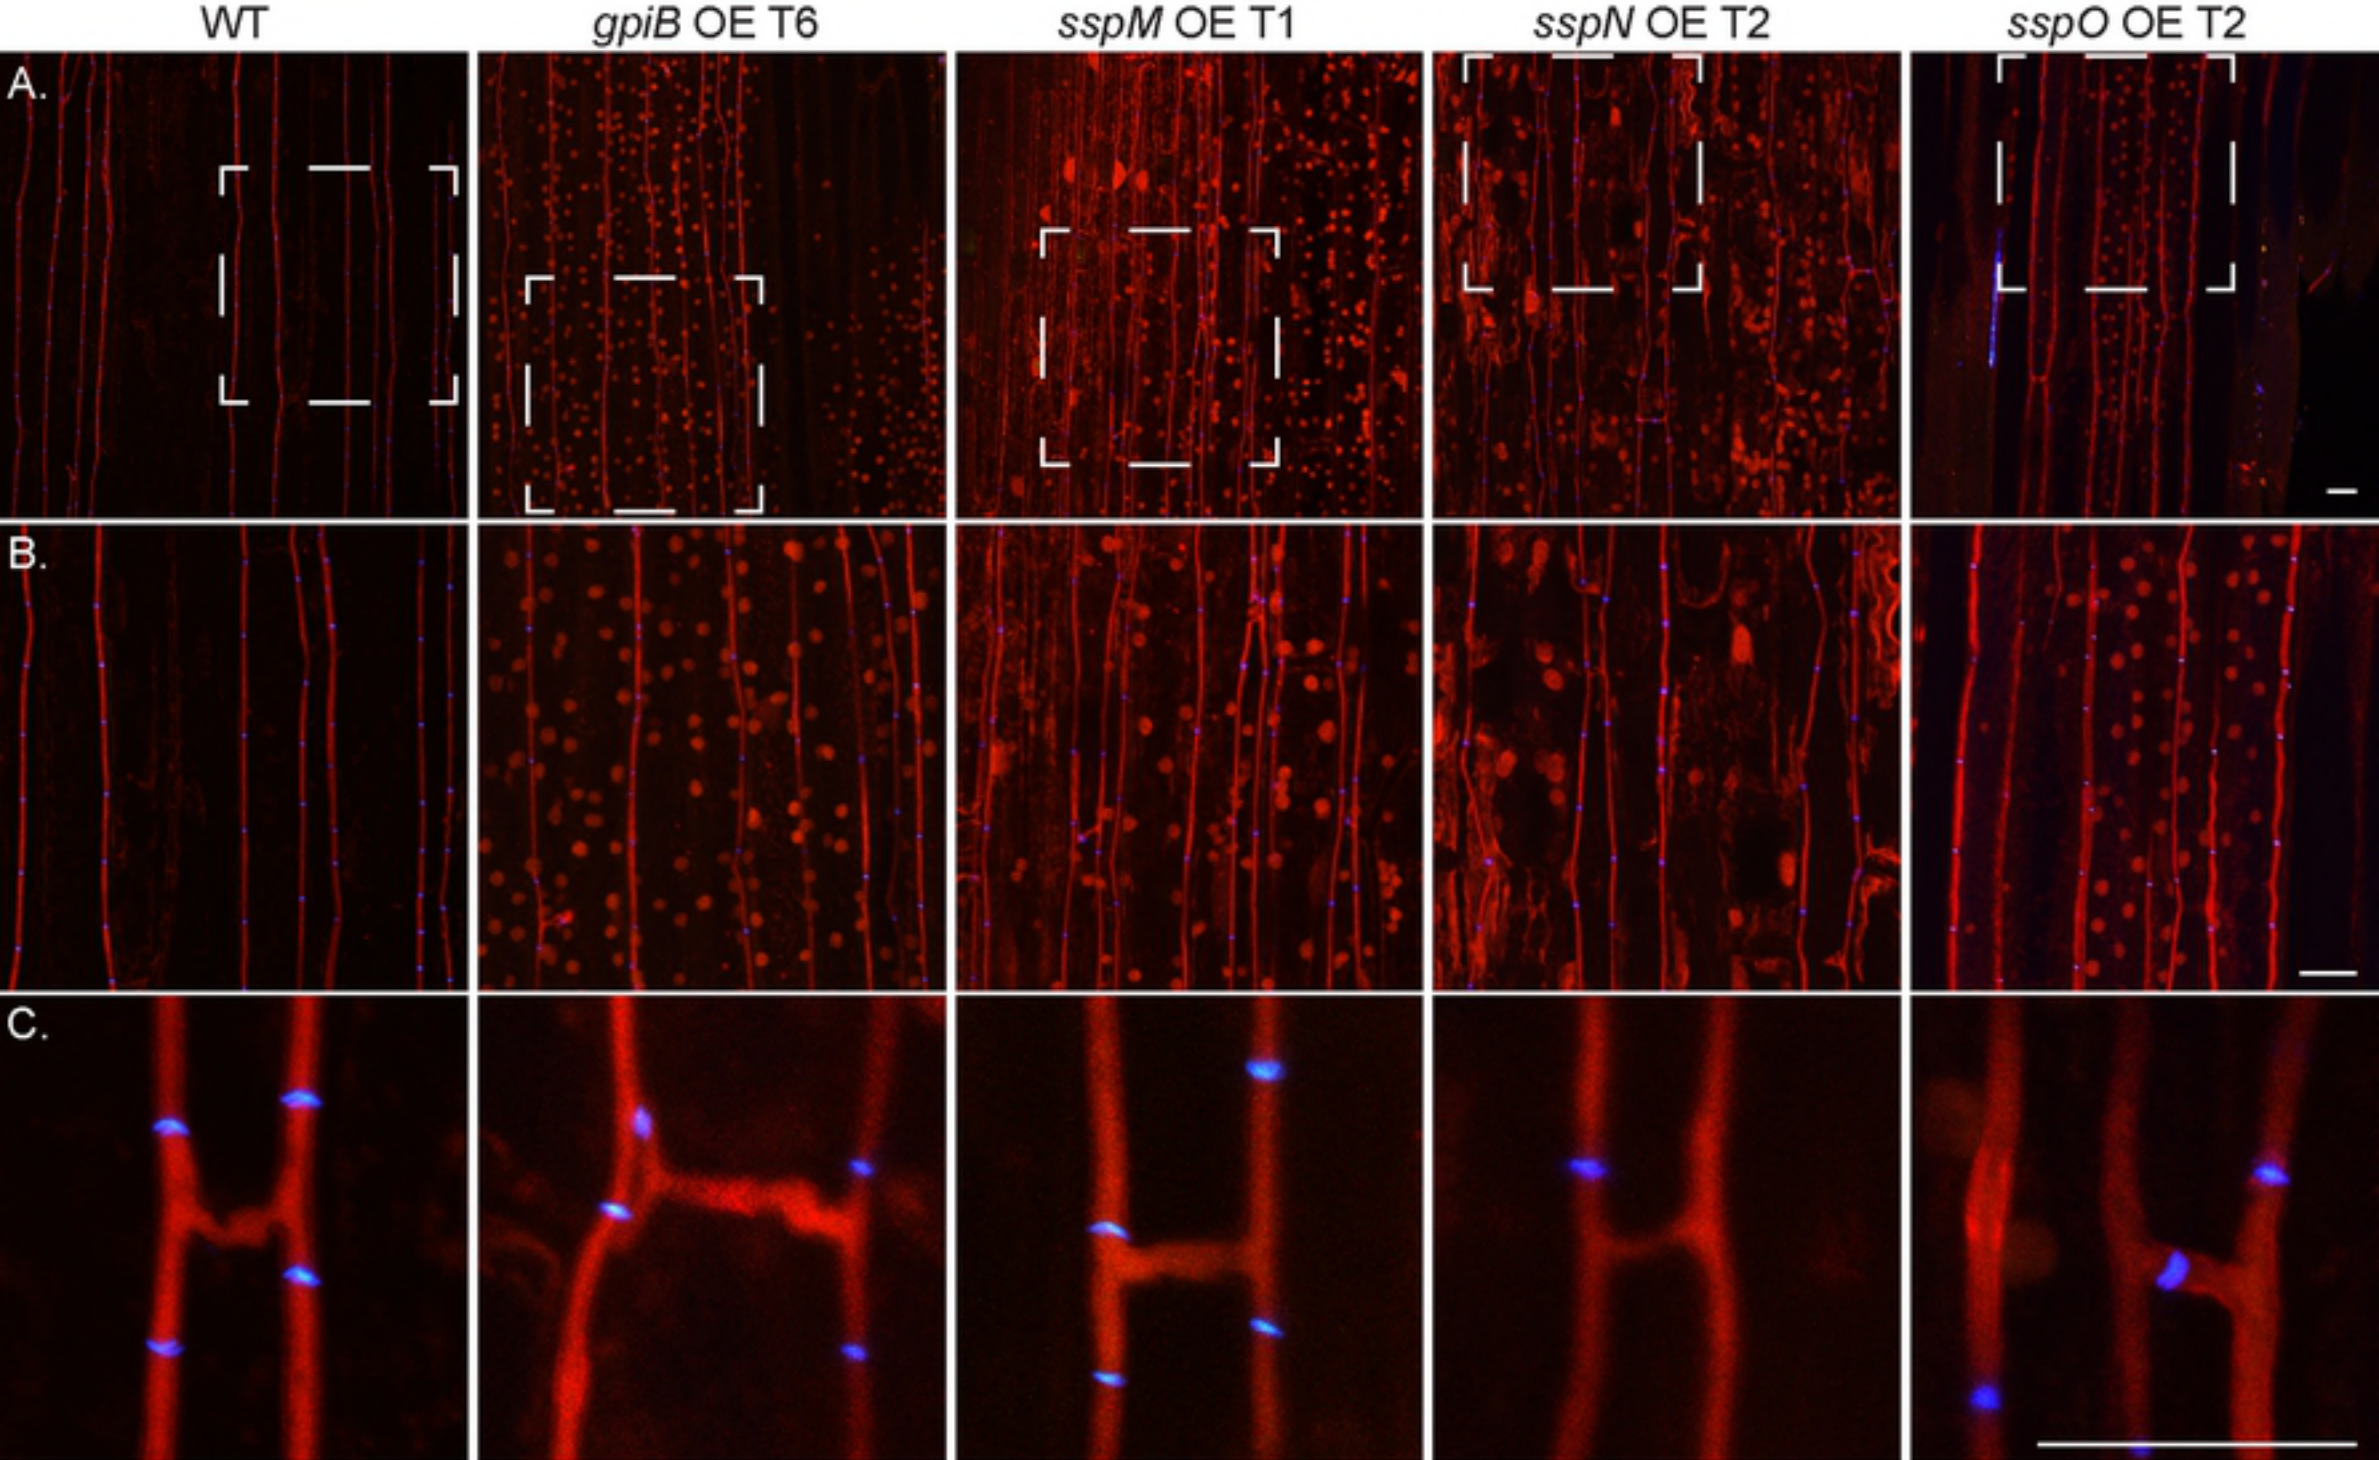

Figure 11



endophytic

epiphyllous

SspM-mCherry-NLS

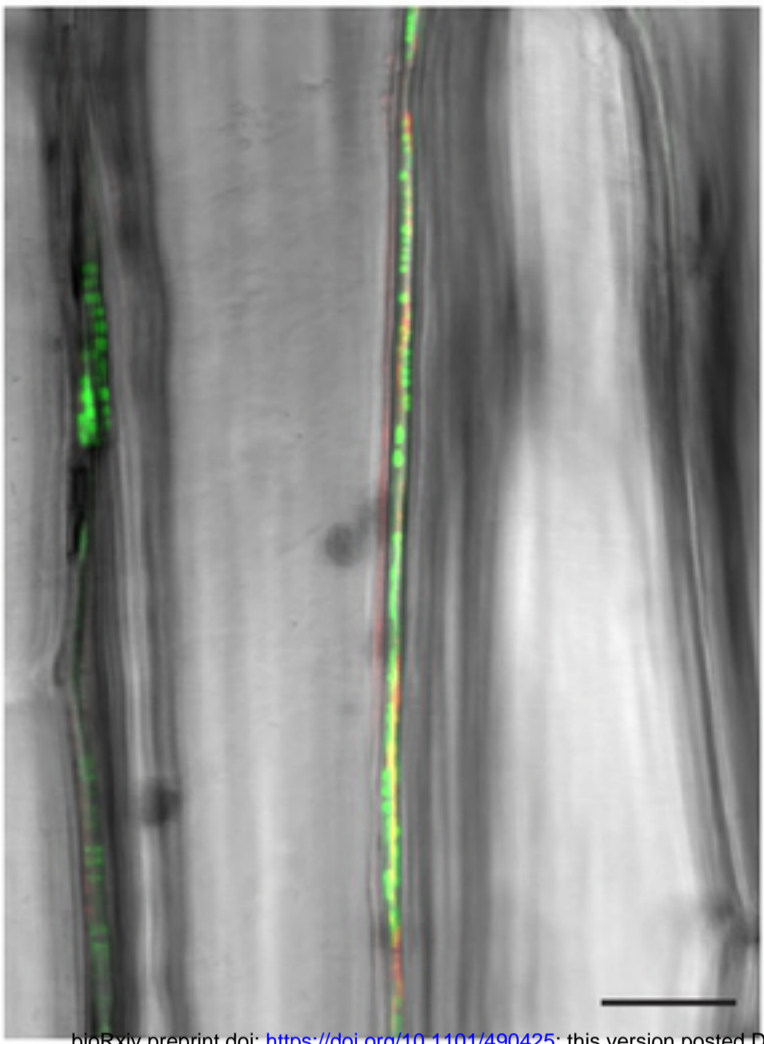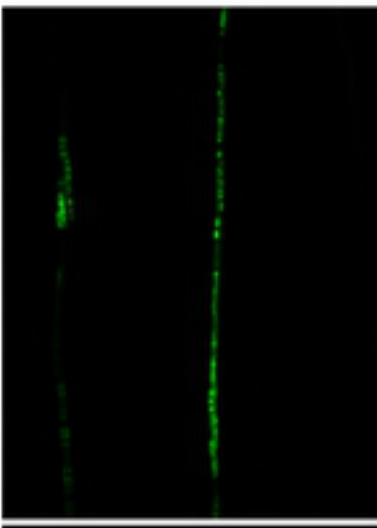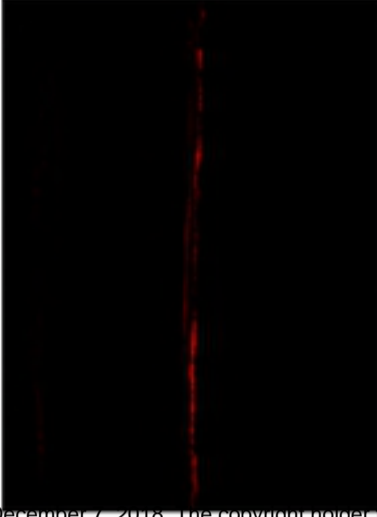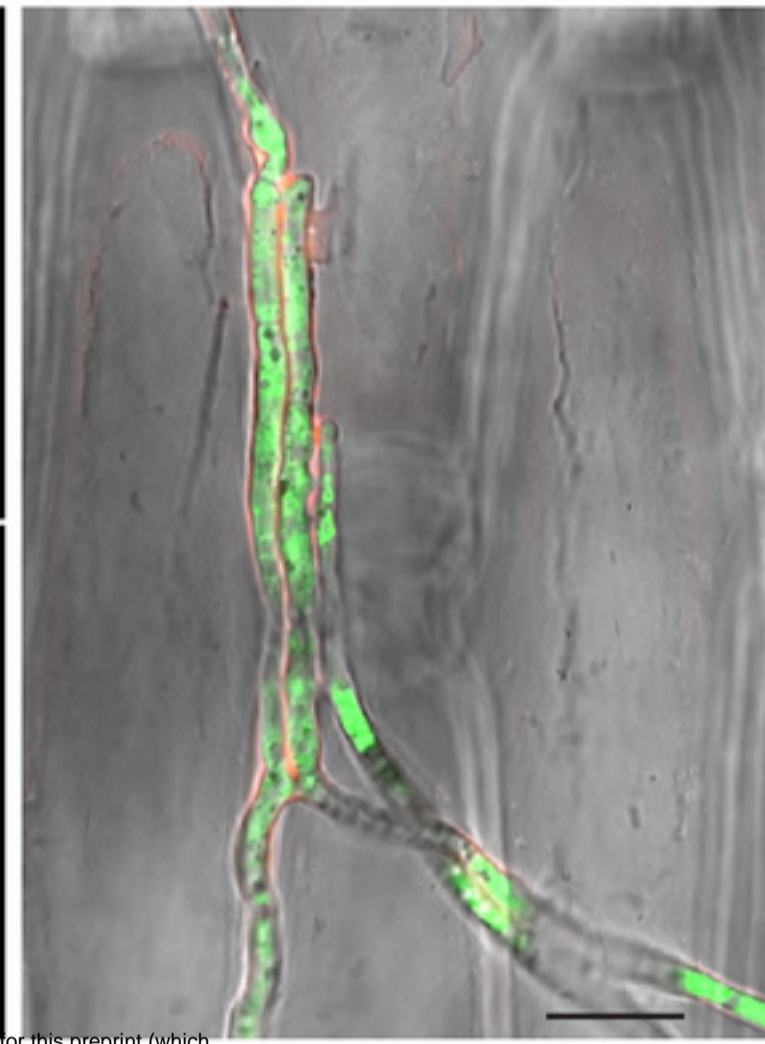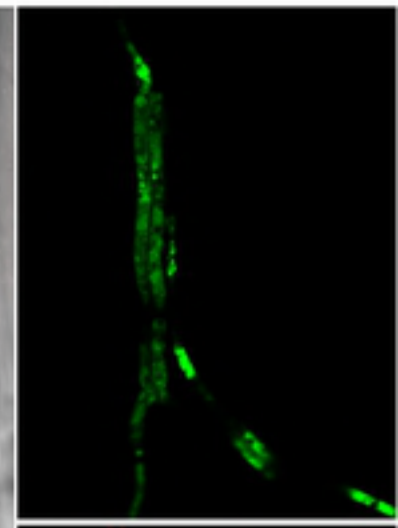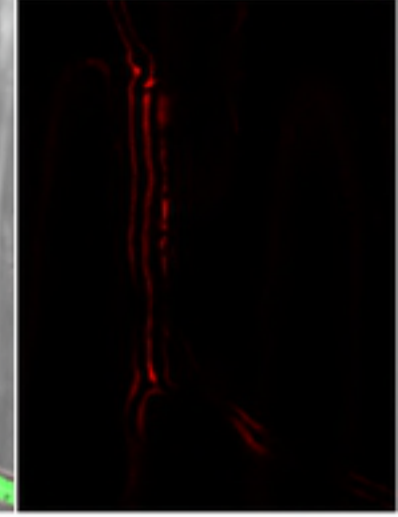

bioRxiv preprint doi: <https://doi.org/10.1101/490425>; this version posted December 7, 2018. The copyright holder for this preprint (which was not certified by peer review) is the author/funder, who has granted bioRxiv a license to display the preprint in perpetuity. It is made available under aCC-BY 4.0 International license.

SspN-mCherry-NLS

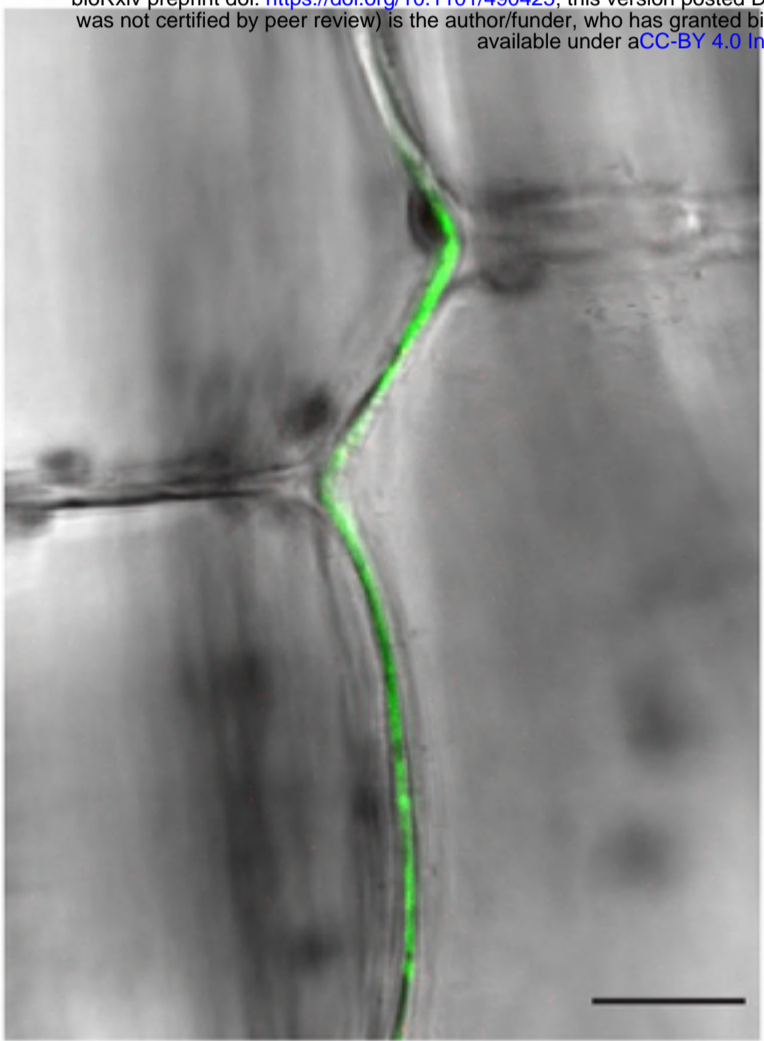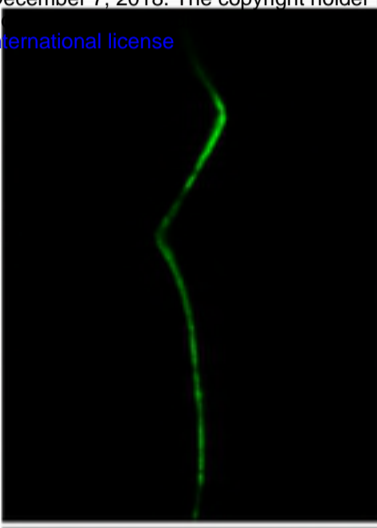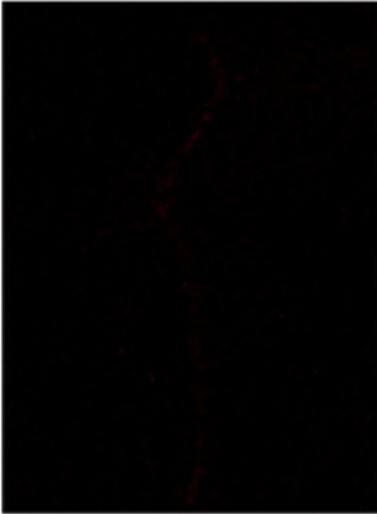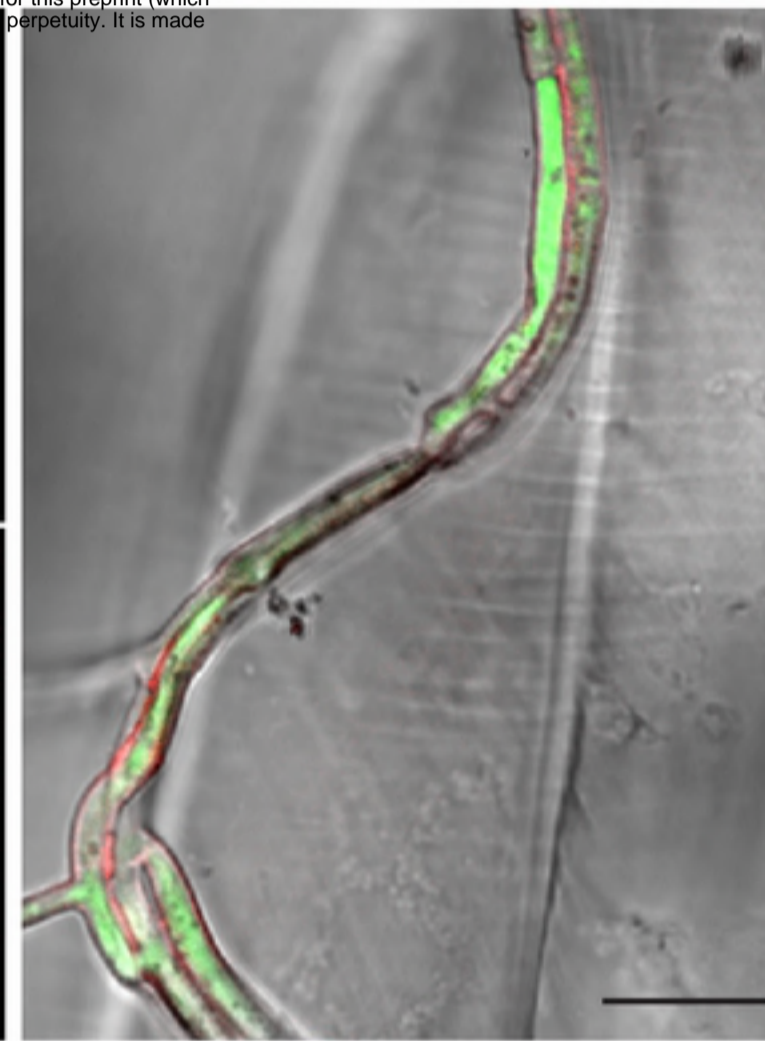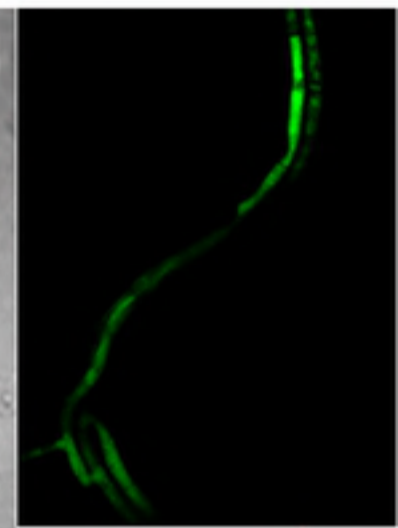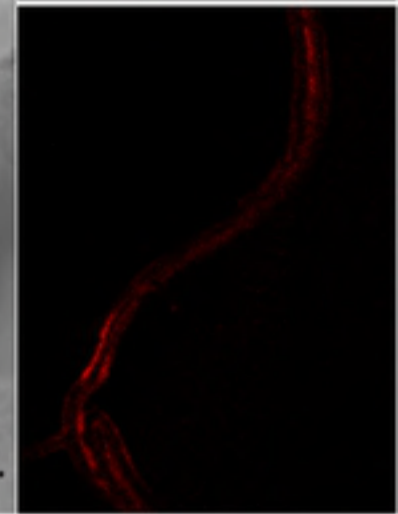

SspO-mCherry-NLS

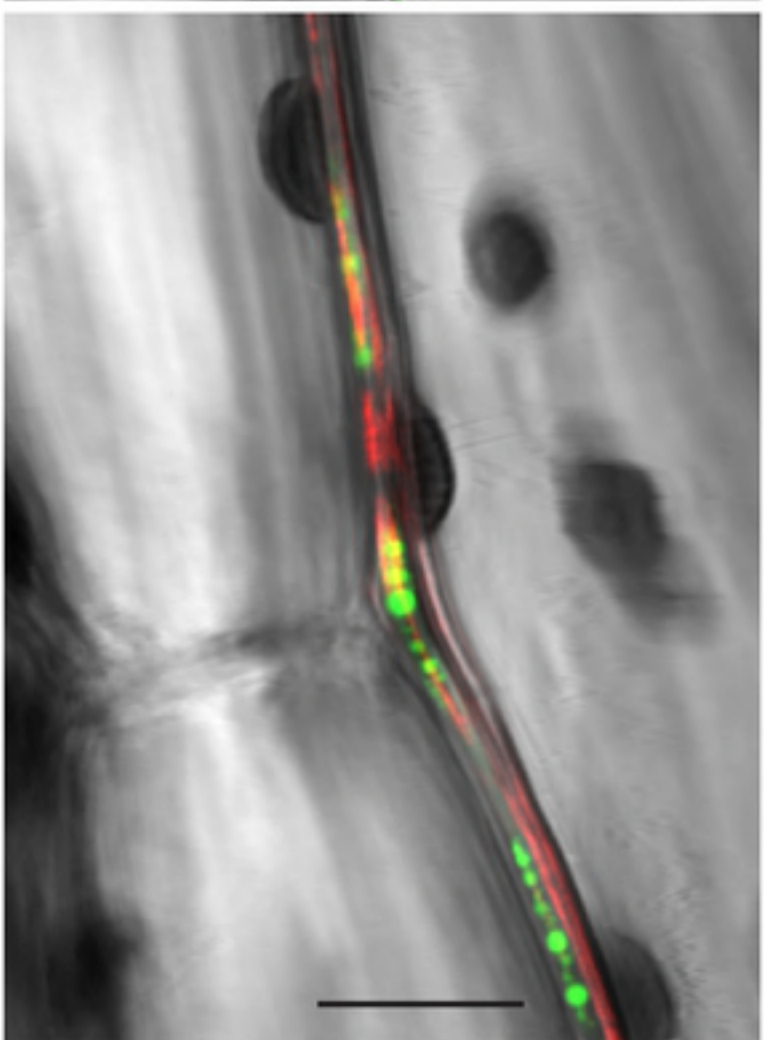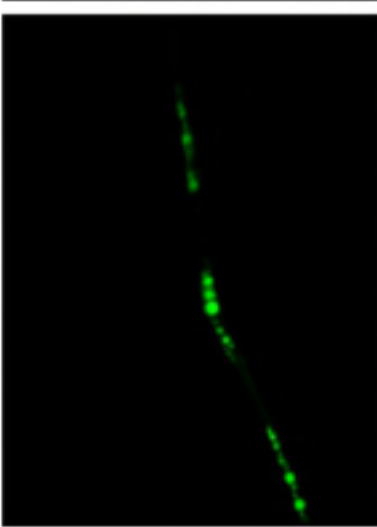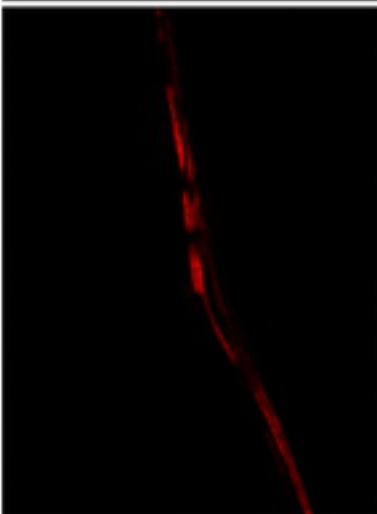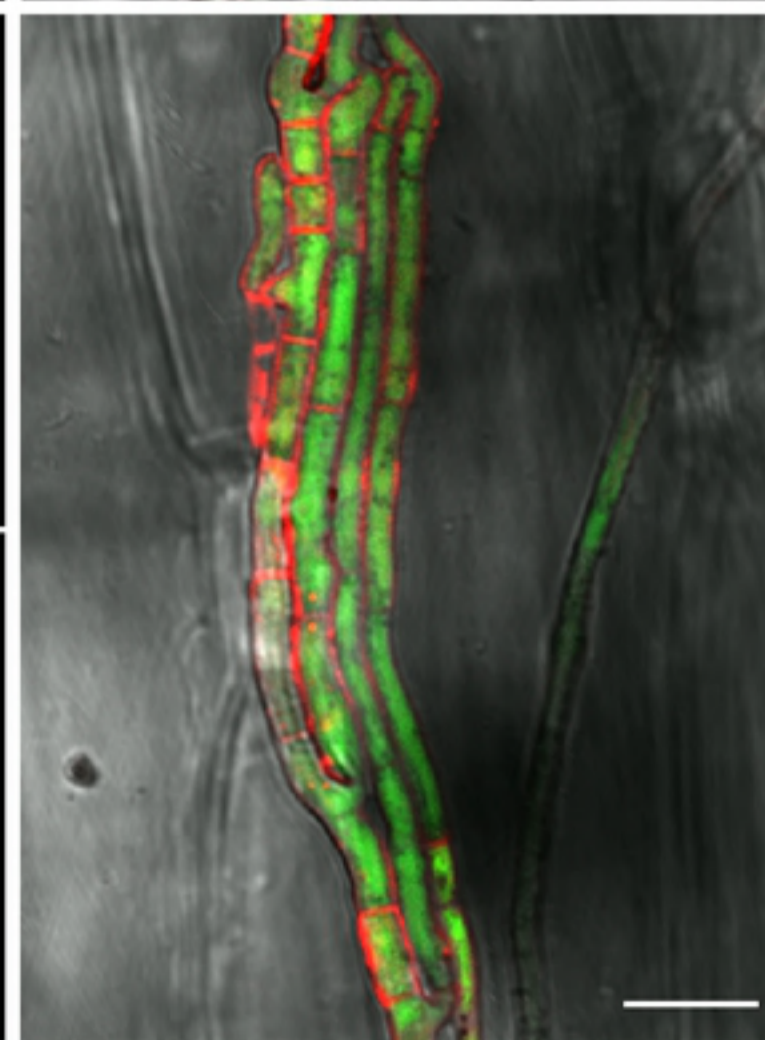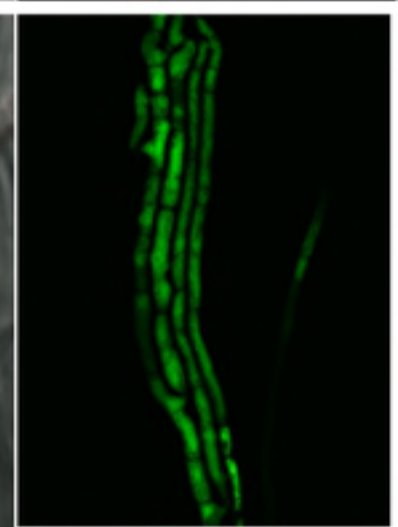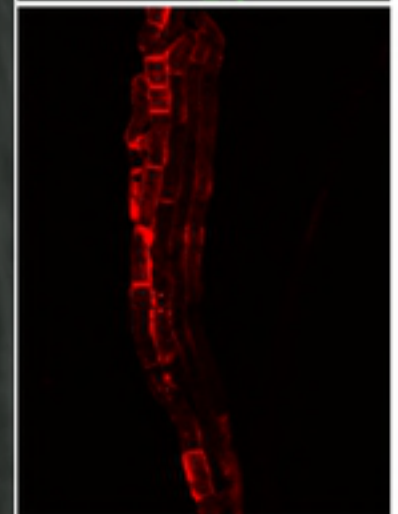

Figure 12



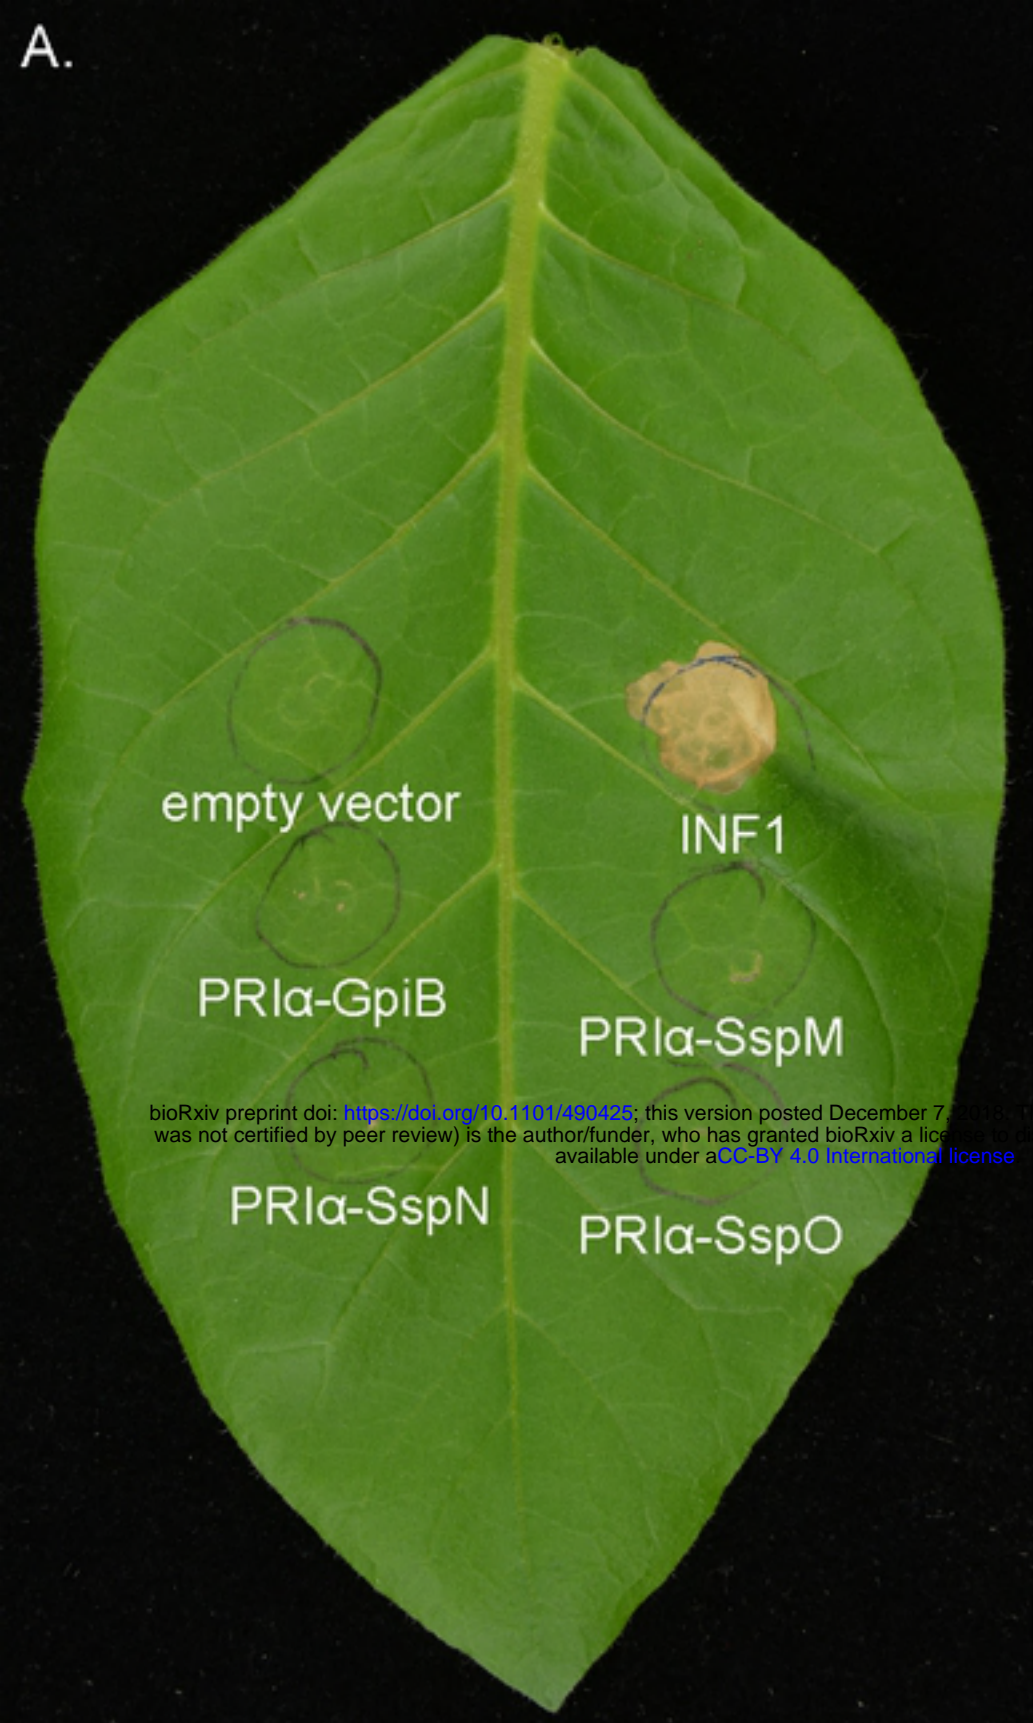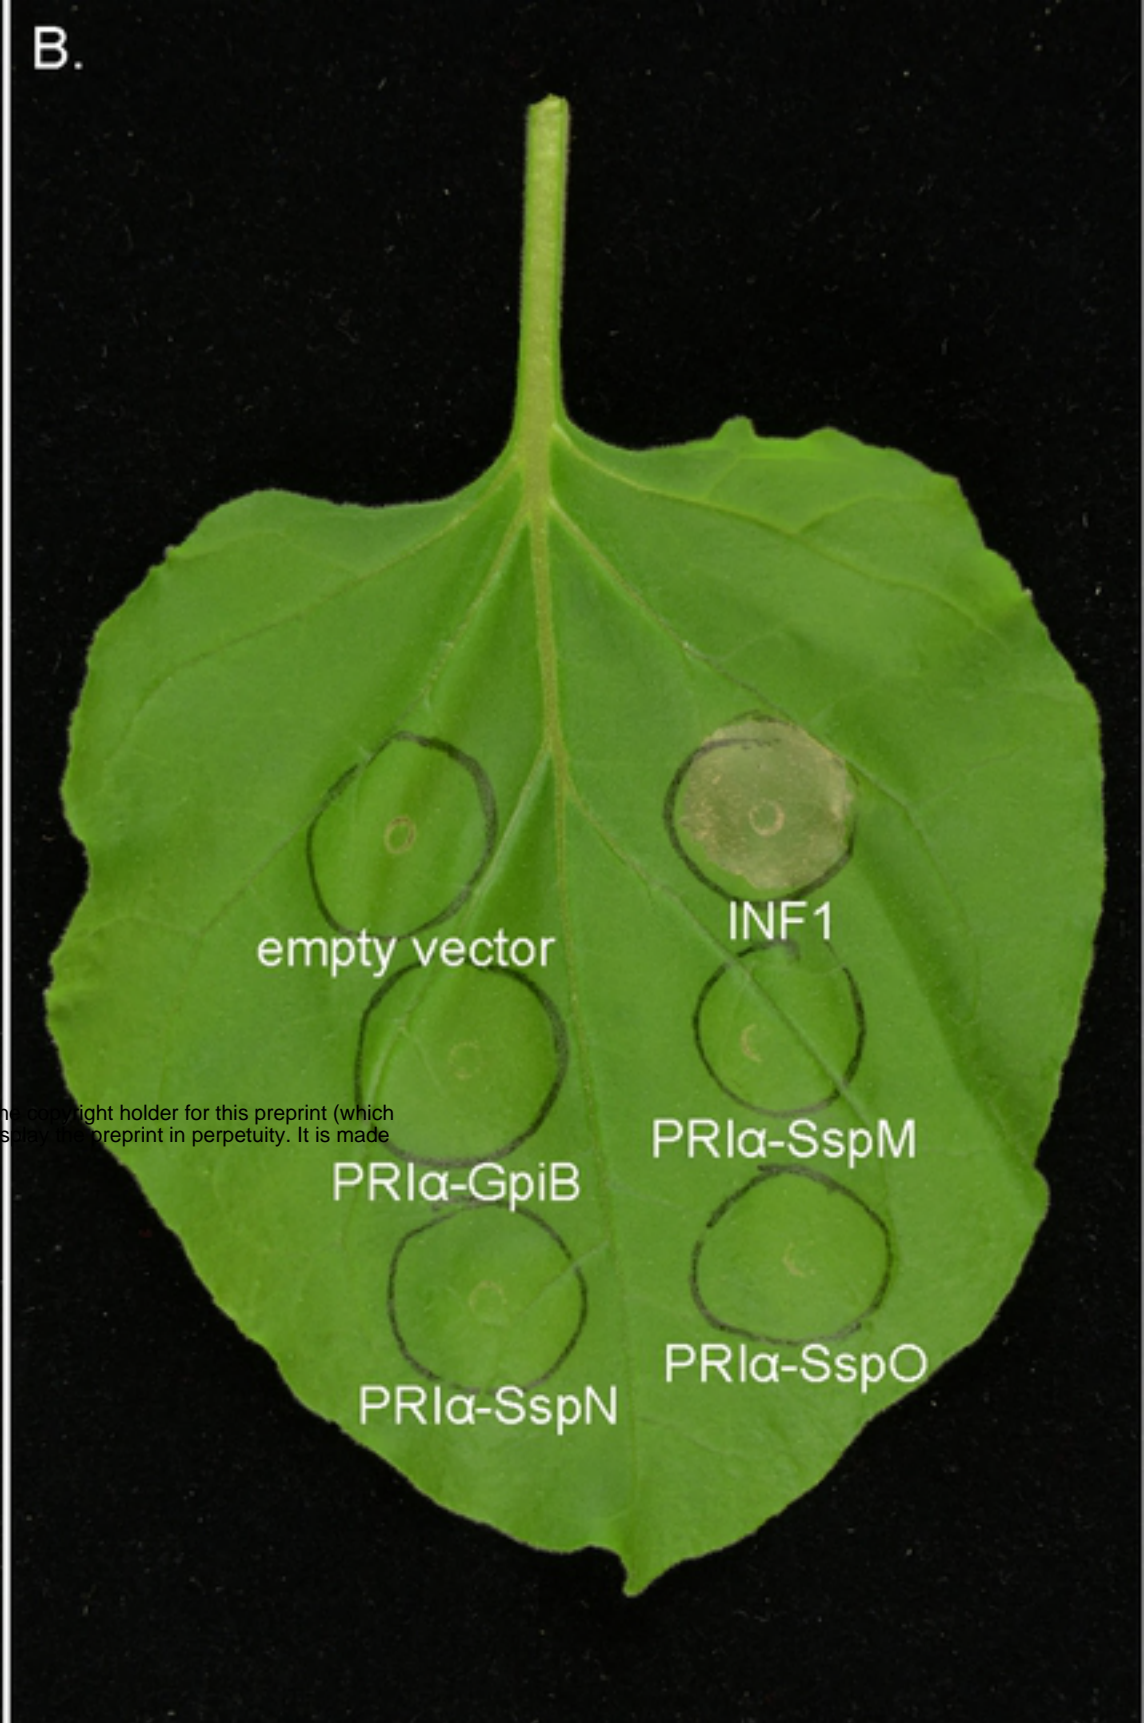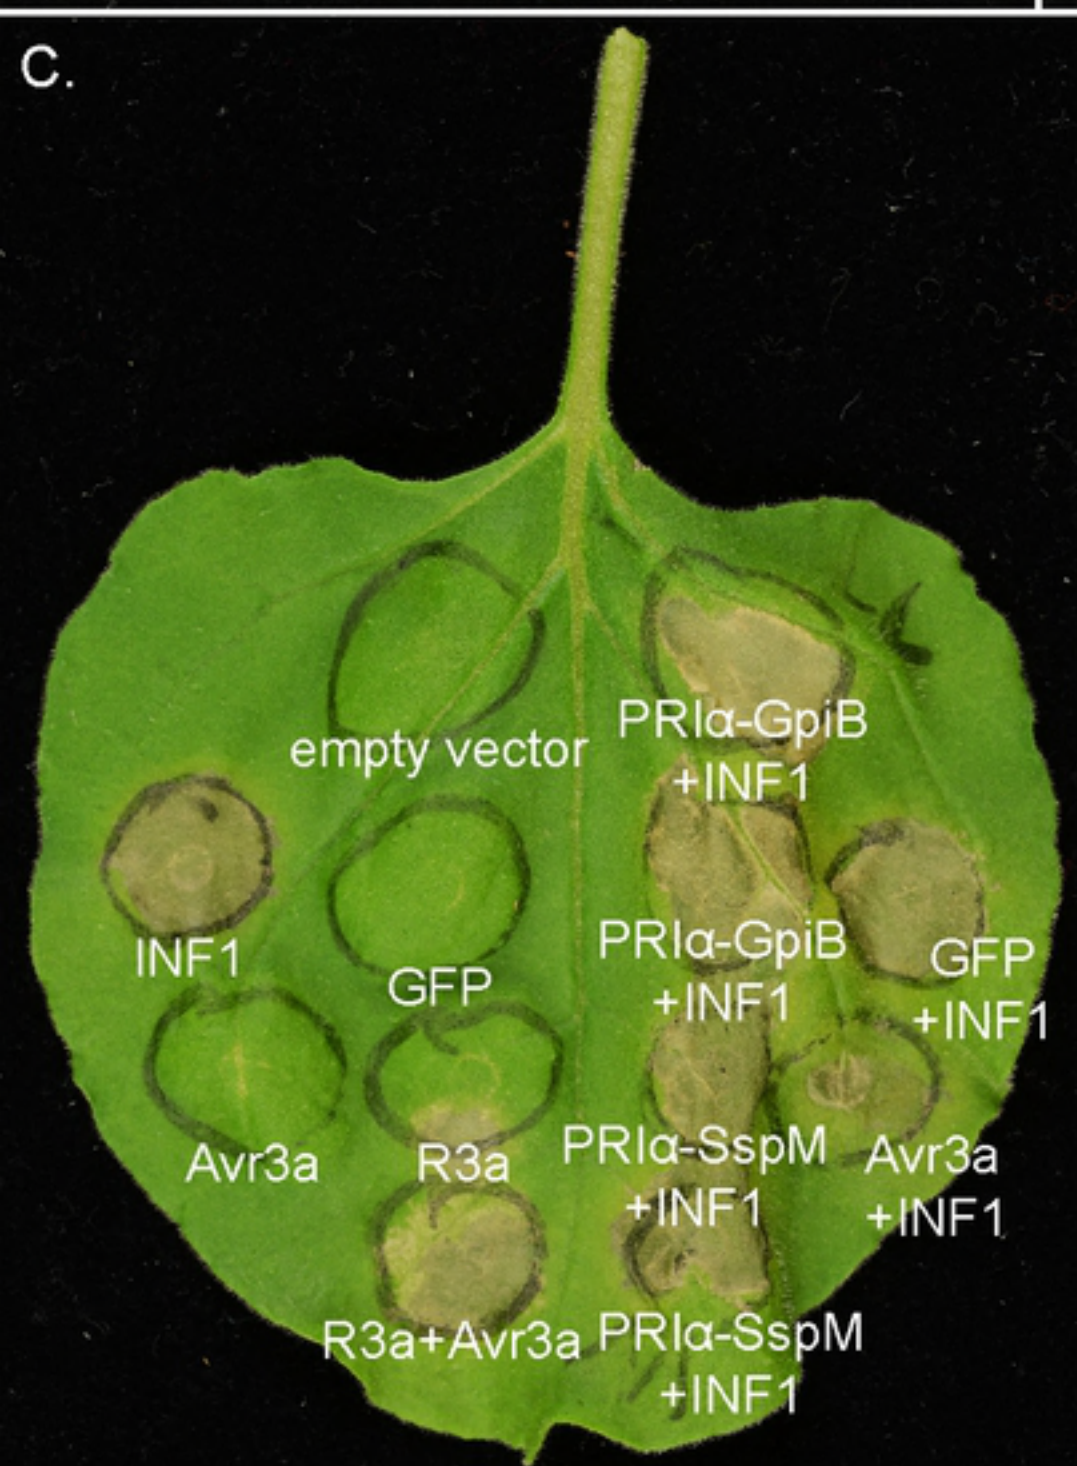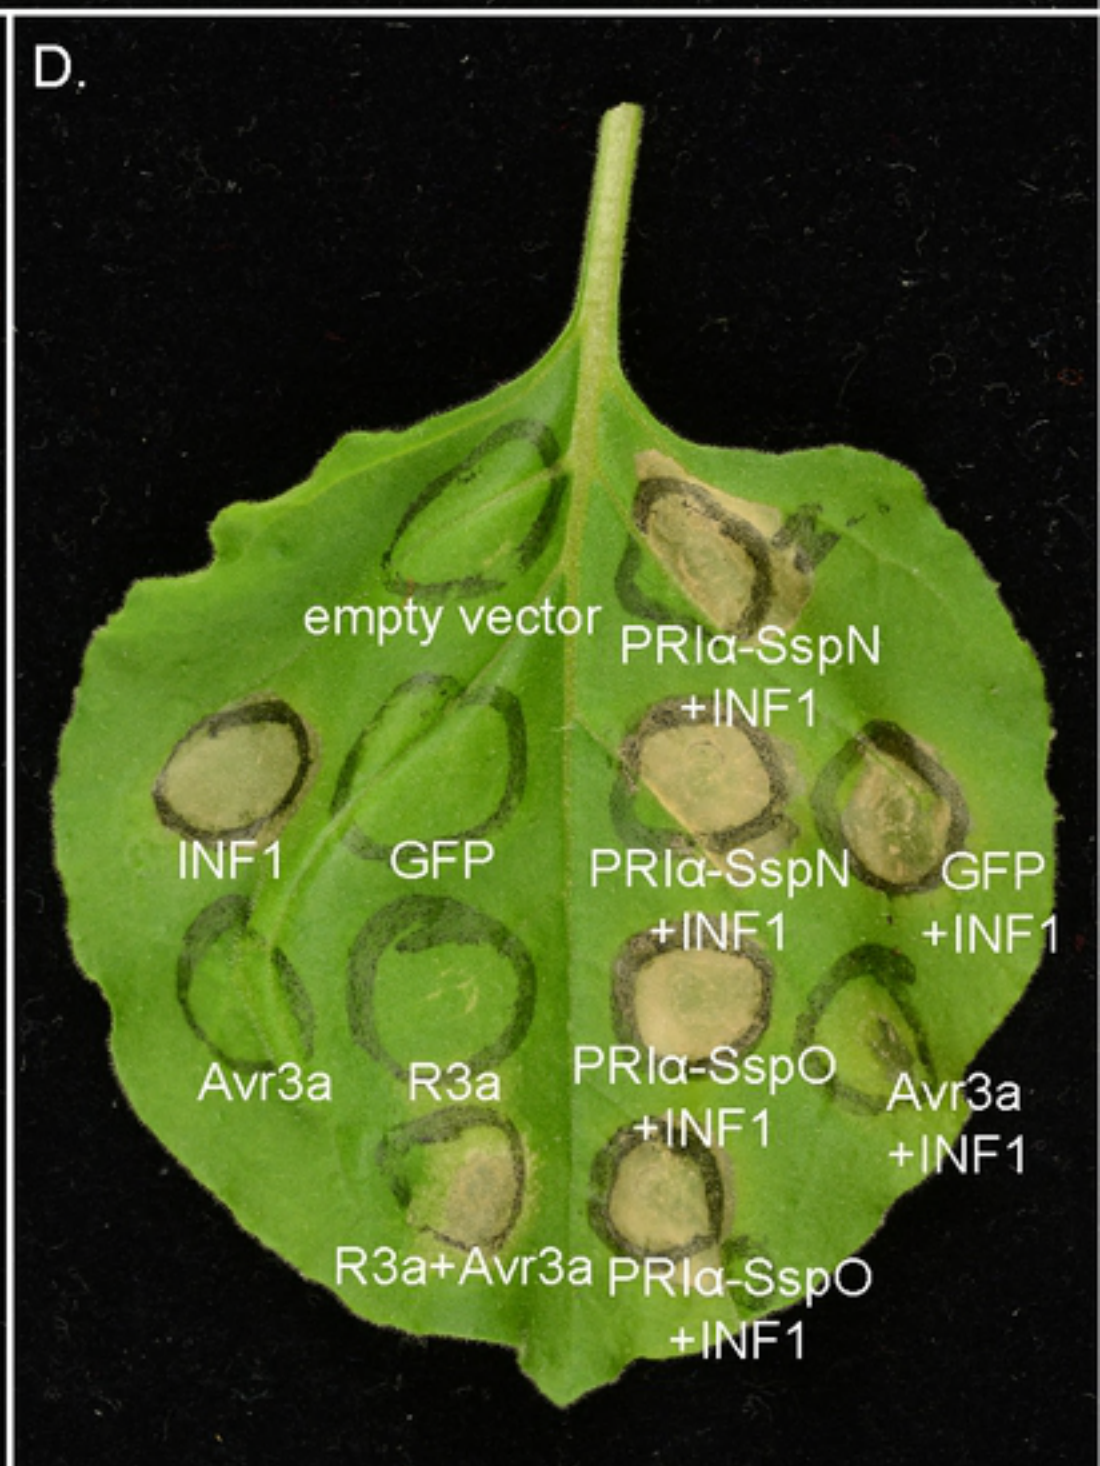

Figure 13
